# Supplementary material
Source: publisher figshare collection journal article supplement (https://gsajournals.figshare.com/ndownloader/files/28101924)
Supplement: Supplementary file 1 [file 28101924]

## Sheet: Sheet1
GeneID	Nearest_ref_gene	Isoform ID	Nearest_ref_transcript	Type	Symbol	Description	KEGG_A_class	KEGG_B_class	Pathway	K_ID	GO Component	GO Function	GO Process
Gene000787	CIL1300S0062	Isoform001620	CIL1300S0062	new	-	probable phospholipid hydroperoxide glutathione peroxidase; K00432 glutathione peroxidase [EC:1.11.1.9]	Metabolism	Metabolism of other amino acids;Lipid metabolism	ko00480//Glutathione metabolism;ko00590//Arachidonic acid metabolism	K00432	-	GO:0003824//catalytic activity;GO:0004601//peroxidase activity;GO:0016684//oxidoreductase activity, acting on peroxide as acceptor;GO:0016491//oxidoreductase activity;GO:0016209//antioxidant activity	GO:0006950//response to stress;GO:0050896//response to stimulus;GO:0044699//single-organism process;GO:0044710//single-organism metabolic process;GO:0008152//metabolic process
Gene000815	CIL1300S0072	Isoform001677	CIL1300S0072	new	-	Monogalactosyl diacylglycerol synthase 1; K03715 1,2-diacylglycerol 3-beta-galactosyltransferase [EC:2.4.1.46]	Metabolism	Global and Overview;Lipid metabolism	ko01100//Metabolic pathways;ko00561//Glycerolipid metabolism	K03715	GO:0031967//organelle envelope;GO:0005623//cell;GO:0044464//cell part;GO:0043229//intracellular organelle;GO:0016020//membrane;GO:0009528//plastid inner membrane;GO:0044422//organelle part;GO:0009526//plastid envelope;GO:0044435//plastid part;GO:0005737//cytoplasm;GO:0044446//intracellular organelle part;GO:0043226//organelle;GO:0031975//envelope;GO:0042170//plastid membrane;GO:0005622//intracell…	GO:0003824//catalytic activity;GO:0016740//transferase activity;GO:0016757//transferase activity, transferring glycosyl groups;GO:0035250//UDP-galactosyltransferase activity;GO:0008194//UDP-glycosyltransferase activity;GO:0005488//binding;GO:0008378//galactosyltransferase activity;GO:0016758//transferase activity, transferring hexosyl groups	GO:0009987//cellular process;GO:0016043//cellular component organization;GO:0061024//membrane organization;GO:1901135//carbohydrate derivative metabolic process;GO:0044238//primary metabolic process;GO:0009657//plastid organization;GO:0006996//organelle organization;GO:0050896//response to stimulus;GO:0051707//response to other organism;GO:0006664//glycolipid metabolic process;GO:0044710//single-…
Gene002013	-	Isoform004427	-	novel	-	3beta-hydroxysteroid-dehydrogenase/decarboxylase isoform 1-like; K07748 sterol-4alpha-carboxylate 3-dehydrogenase (decarboxylating) [EC:1.1.1.170]	Metabolism	Global and Overview;Lipid metabolism	ko01100//Metabolic pathways;ko01130//Biosynthesis of antibiotics;ko00100//Steroid biosynthesis	K07748	-	-	-
Gene004667	-	Isoform010305	-	novel	-	Squalene monooxygenase isoform 1; K00511 squalene monooxygenase [EC:1.14.13.132]	Metabolism	Global and Overview;Metabolism of terpenoids and polyketides;Lipid metabolism	ko01100//Metabolic pathways;ko01110//Biosynthesis of secondary metabolites;ko01130//Biosynthesis of antibiotics;ko00100//Steroid biosynthesis;ko00909//Sesquiterpenoid and triterpenoid biosynthesis	K00511	GO:0044425//membrane part;GO:0016020//membrane;GO:0031224//intrinsic component of membrane	GO:0005488//binding;GO:0004497//monooxygenase activity;GO:0097159//organic cyclic compound binding;GO:0003824//catalytic activity;GO:0016709//oxidoreductase activity, acting on paired donors, with incorporation or reduction of molecular oxygen, NAD(P)H as one donor, and incorporation of one atom of oxygen;GO:0036094//small molecule binding;GO:0000166//nucleotide binding;GO:1901265//nucleoside pho…	GO:0044699//single-organism process;GO:0008152//metabolic process;GO:0044710//single-organism metabolic process
Gene005477	CIL0262S0009	Isoform012072	CIL0262S0009	new	-	aldehyde dehydrogenase family 7 member A1; K14085 aldehyde dehydrogenase family 7 member A1 [EC:1.2.1.31 1.2.1.8 1.2.1.3]	Metabolism	Global and Overview;Amino acid metabolism;Metabolism of other amino acids;Lipid metabolism;Carbohydrate metabolism	ko01100//Metabolic pathways;ko01110//Biosynthesis of secondary metabolites;ko01130//Biosynthesis of antibiotics;ko01120//Microbial metabolism in diverse environments;ko01230//Biosynthesis of amino acids;ko00010//Glycolysis / Gluconeogenesis;ko00620//Pyruvate metabolism;ko00071//Fatty acid degradation;ko00280//Valine, leucine and isoleucine degradation;ko00561//Glycerolipid metabolism;ko00260//Gly…	K14085	-	-	-
Gene005477	CIL0262S0009	Isoform012073	CIL0262S0009	new	-	aldehyde dehydrogenase family 7 member A1; K14085 aldehyde dehydrogenase family 7 member A1 [EC:1.2.1.31 1.2.1.8 1.2.1.3]	Metabolism	Global and Overview;Metabolism of other amino acids;Lipid metabolism;Amino acid metabolism;Carbohydrate metabolism	ko01100//Metabolic pathways;ko01110//Biosynthesis of secondary metabolites;ko01130//Biosynthesis of antibiotics;ko01120//Microbial metabolism in diverse environments;ko01230//Biosynthesis of amino acids;ko00010//Glycolysis / Gluconeogenesis;ko00620//Pyruvate metabolism;ko00071//Fatty acid degradation;ko00280//Valine, leucine and isoleucine degradation;ko00561//Glycerolipid metabolism;ko00260//Gly…	K14085	-	-	-
Gene005477	CIL0262S0009	Isoform012074	CIL0262S0009	new	-	aldehyde dehydrogenase family 7 member A1-like; K14085 aldehyde dehydrogenase family 7 member A1 [EC:1.2.1.31 1.2.1.8 1.2.1.3]	Metabolism	Global and Overview;Metabolism of other amino acids;Lipid metabolism;Amino acid metabolism;Carbohydrate metabolism	ko01100//Metabolic pathways;ko01110//Biosynthesis of secondary metabolites;ko01130//Biosynthesis of antibiotics;ko01120//Microbial metabolism in diverse environments;ko01230//Biosynthesis of amino acids;ko00010//Glycolysis / Gluconeogenesis;ko00620//Pyruvate metabolism;ko00071//Fatty acid degradation;ko00280//Valine, leucine and isoleucine degradation;ko00561//Glycerolipid metabolism;ko00260//Gly…	K14085	-	-	-
Gene005477	CIL0262S0009	Isoform012075	CIL0262S0009	new	-	aldehyde dehydrogenase family 7 member A1; K14085 aldehyde dehydrogenase family 7 member A1 [EC:1.2.1.31 1.2.1.8 1.2.1.3]	Metabolism	Lipid metabolism;Metabolism of other amino acids;Amino acid metabolism;Carbohydrate metabolism;Global and Overview	ko01100//Metabolic pathways;ko01110//Biosynthesis of secondary metabolites;ko01130//Biosynthesis of antibiotics;ko01120//Microbial metabolism in diverse environments;ko01230//Biosynthesis of amino acids;ko00010//Glycolysis / Gluconeogenesis;ko00620//Pyruvate metabolism;ko00071//Fatty acid degradation;ko00280//Valine, leucine and isoleucine degradation;ko00561//Glycerolipid metabolism;ko00260//Gly…	K14085	-	GO:0016491//oxidoreductase activity;GO:0003824//catalytic activity;GO:0016903//oxidoreductase activity, acting on the aldehyde or oxo group of donors	GO:0044699//single-organism process;GO:0008152//metabolic process;GO:0044710//single-organism metabolic process
Gene005537	CIL0277S0001	Isoform012225	CIL0277S0001	new	-	lecithin:cholesterol acyltransferase family protein; K00679 phospholipid:diacylglycerol acyltransferase [EC:2.3.1.158]	Metabolism	Lipid metabolism	ko00561//Glycerolipid metabolism	K00679	-	-	-
Gene006106	-	Isoform013450	-	novel	-	acyl-[acyl-carrier-protein] desaturase, chloroplastic-like; K03921 acyl-[acyl-carrier-protein] desaturase [EC:1.14.19.2]	Metabolism	Global and Overview;Lipid metabolism	ko01212//Fatty acid metabolism;ko00061//Fatty acid biosynthesis;ko01040//Biosynthesis of unsaturated fatty acids	K03921	GO:0044424//intracellular part;GO:0005737//cytoplasm;GO:0044464//cell part;GO:0009536//plastid;GO:0005623//cell;GO:0044444//cytoplasmic part;GO:0043226//organelle;GO:0005622//intracellular;GO:0043229//intracellular organelle;GO:0043227//membrane-bounded organelle;GO:0043231//intracellular membrane-bounded organelle	GO:0016717//oxidoreductase activity, acting on paired donors, with oxidation of a pair of donors resulting in the reduction of molecular oxygen to two molecules of water;GO:0016705//oxidoreductase activity, acting on paired donors, with incorporation or reduction of molecular oxygen;GO:0016491//oxidoreductase activity;GO:0003824//catalytic activity	GO:0006631//fatty acid metabolic process;GO:0006629//lipid metabolic process;GO:0071704//organic substance metabolic process;GO:0009987//cellular process;GO:0008152//metabolic process;GO:0044699//single-organism process;GO:0044255//cellular lipid metabolic process;GO:0044237//cellular metabolic process;GO:0044281//small molecule metabolic process;GO:0043436//oxoacid metabolic process;GO:0006082//…
Gene006109	CIL0436S0014	Isoform013455	CIL0436S0014	new	-	Plant stearoyl-acyl-carrier-protein desaturase family protein; K03921 acyl-[acyl-carrier-protein] desaturase [EC:1.14.19.2]	Metabolism	Lipid metabolism;Global and Overview	ko01212//Fatty acid metabolism;ko00061//Fatty acid biosynthesis;ko01040//Biosynthesis of unsaturated fatty acids	K03921	GO:0044444//cytoplasmic part;GO:0044424//intracellular part;GO:0005623//cell;GO:0043226//organelle;GO:0043231//intracellular membrane-bounded organelle;GO:0009536//plastid;GO:0043229//intracellular organelle;GO:0043227//membrane-bounded organelle;GO:0044464//cell part;GO:0005622//intracellular;GO:0005737//cytoplasm	GO:0003824//catalytic activity;GO:0016491//oxidoreductase activity;GO:0016717//oxidoreductase activity, acting on paired donors, with oxidation of a pair of donors resulting in the reduction of molecular oxygen to two molecules of water;GO:0016705//oxidoreductase activity, acting on paired donors, with incorporation or reduction of molecular oxygen	GO:0044710//single-organism metabolic process;GO:0043436//oxoacid metabolic process;GO:0044255//cellular lipid metabolic process;GO:0006631//fatty acid metabolic process;GO:0044763//single-organism cellular process;GO:0044238//primary metabolic process;GO:0044237//cellular metabolic process;GO:0044699//single-organism process;GO:0071704//organic substance metabolic process;GO:0008152//metabolic p…
Gene006109	CIL0436S0014	Isoform013456	CIL0436S0014	new	-	acyl-[acyl-carrier-protein] desaturase, chloroplastic-like; K03921 acyl-[acyl-carrier-protein] desaturase [EC:1.14.19.2]	Metabolism	Global and Overview;Lipid metabolism	ko01212//Fatty acid metabolism;ko00061//Fatty acid biosynthesis;ko01040//Biosynthesis of unsaturated fatty acids	K03921	GO:0043226//organelle;GO:0044444//cytoplasmic part;GO:0043229//intracellular organelle;GO:0044424//intracellular part;GO:0043231//intracellular membrane-bounded organelle;GO:0005737//cytoplasm;GO:0009536//plastid;GO:0044464//cell part;GO:0005622//intracellular;GO:0005623//cell;GO:0043227//membrane-bounded organelle	GO:0016717//oxidoreductase activity, acting on paired donors, with oxidation of a pair of donors resulting in the reduction of molecular oxygen to two molecules of water;GO:0016705//oxidoreductase activity, acting on paired donors, with incorporation or reduction of molecular oxygen;GO:0016491//oxidoreductase activity;GO:0003824//catalytic activity	GO:0009987//cellular process;GO:0006631//fatty acid metabolic process;GO:0006629//lipid metabolic process;GO:0043436//oxoacid metabolic process;GO:0071704//organic substance metabolic process;GO:0044255//cellular lipid metabolic process;GO:0006082//organic acid metabolic process;GO:0044763//single-organism cellular process;GO:0019752//carboxylic acid metabolic process;GO:0044238//primary metaboli…
Gene006109	CIL0436S0014	Isoform013457	CIL0436S0014	new	-	acyl-[acyl-carrier-protein] desaturase, chloroplastic (EC:1.14.19.2); K03921 acyl-[acyl-carrier-protein] desaturase [EC:1.14.19.2]	Metabolism	Lipid metabolism;Global and Overview	ko01212//Fatty acid metabolism;ko00061//Fatty acid biosynthesis;ko01040//Biosynthesis of unsaturated fatty acids	K03921	GO:0043226//organelle;GO:0044424//intracellular part;GO:0044464//cell part;GO:0005623//cell;GO:0043229//intracellular organelle;GO:0043231//intracellular membrane-bounded organelle;GO:0005737//cytoplasm;GO:0005622//intracellular;GO:0043227//membrane-bounded organelle;GO:0009536//plastid;GO:0044444//cytoplasmic part	GO:0016705//oxidoreductase activity, acting on paired donors, with incorporation or reduction of molecular oxygen;GO:0016717//oxidoreductase activity, acting on paired donors, with oxidation of a pair of donors resulting in the reduction of molecular oxygen to two molecules of water;GO:0016491//oxidoreductase activity;GO:0003824//catalytic activity	GO:0009987//cellular process;GO:0044255//cellular lipid metabolic process;GO:0044763//single-organism cellular process;GO:0071704//organic substance metabolic process;GO:0044238//primary metabolic process;GO:0006631//fatty acid metabolic process;GO:0044699//single-organism process;GO:0019752//carboxylic acid metabolic process;GO:0006082//organic acid metabolic process;GO:0044281//small molecule m…
Gene006109	CIL0436S0014	Isoform013458	CIL0436S0014	new	-	Plant stearoyl-acyl-carrier-protein desaturase family protein; K03921 acyl-[acyl-carrier-protein] desaturase [EC:1.14.19.2]	Metabolism	Global and Overview;Lipid metabolism	ko01212//Fatty acid metabolism;ko00061//Fatty acid biosynthesis;ko01040//Biosynthesis of unsaturated fatty acids	K03921	GO:0043226//organelle;GO:0043231//intracellular membrane-bounded organelle;GO:0044444//cytoplasmic part;GO:0005737//cytoplasm;GO:0043229//intracellular organelle;GO:0044464//cell part;GO:0005622//intracellular;GO:0005623//cell;GO:0044424//intracellular part;GO:0043227//membrane-bounded organelle;GO:0009536//plastid	GO:0016705//oxidoreductase activity, acting on paired donors, with incorporation or reduction of molecular oxygen;GO:0003824//catalytic activity;GO:0016491//oxidoreductase activity;GO:0016717//oxidoreductase activity, acting on paired donors, with oxidation of a pair of donors resulting in the reduction of molecular oxygen to two molecules of water	GO:0044699//single-organism process;GO:0044710//single-organism metabolic process;GO:0044255//cellular lipid metabolic process;GO:0019752//carboxylic acid metabolic process;GO:0008152//metabolic process;GO:0044281//small molecule metabolic process;GO:0044763//single-organism cellular process;GO:0071704//organic substance metabolic process;GO:0009987//cellular process;GO:0044238//primary metabolic…
Gene008330	CIL0937S0013	Isoform018367	CIL0937S0013	new	-	prostaglandin E synthase 2-like; K05309 microsomal prostaglandin-E synthase 2 [EC:5.3.99.3]	Metabolism	Global and Overview;Lipid metabolism	ko01100//Metabolic pathways;ko00590//Arachidonic acid metabolism	K05309	-	-	-
Gene008397	CIL0937S0131	Isoform018501	CIL0937S0131	new	-	squalene epoxidase 3; K00511 squalene monooxygenase [EC:1.14.13.132]	Metabolism	Lipid metabolism;Metabolism of terpenoids and polyketides;Global and Overview	ko01100//Metabolic pathways;ko01110//Biosynthesis of secondary metabolites;ko01130//Biosynthesis of antibiotics;ko00100//Steroid biosynthesis;ko00909//Sesquiterpenoid and triterpenoid biosynthesis	K00511	GO:0044425//membrane part;GO:0031224//intrinsic component of membrane;GO:0016020//membrane	GO:0016705//oxidoreductase activity, acting on paired donors, with incorporation or reduction of molecular oxygen;GO:1901265//nucleoside phosphate binding;GO:0004497//monooxygenase activity;GO:0000166//nucleotide binding;GO:1901363//heterocyclic compound binding;GO:0016709//oxidoreductase activity, acting on paired donors, with incorporation or reduction of molecular oxygen, NAD(P)H as one donor,…	GO:0008152//metabolic process;GO:0044710//single-organism metabolic process;GO:0044699//single-organism process
Gene008397	CIL0937S0131	Isoform018502	CIL0937S0131	new	-	squalene epoxidase 3; K00511 squalene monooxygenase [EC:1.14.13.132]	Metabolism	Lipid metabolism;Metabolism of terpenoids and polyketides;Global and Overview	ko01100//Metabolic pathways;ko01110//Biosynthesis of secondary metabolites;ko01130//Biosynthesis of antibiotics;ko00100//Steroid biosynthesis;ko00909//Sesquiterpenoid and triterpenoid biosynthesis	K00511	GO:0044425//membrane part;GO:0016020//membrane;GO:0031224//intrinsic component of membrane	GO:0000166//nucleotide binding;GO:0004497//monooxygenase activity;GO:0016491//oxidoreductase activity;GO:0097159//organic cyclic compound binding;GO:0005488//binding;GO:0036094//small molecule binding;GO:0016705//oxidoreductase activity, acting on paired donors, with incorporation or reduction of molecular oxygen;GO:1901363//heterocyclic compound binding;GO:0016709//oxidoreductase activity, actin…	GO:0044710//single-organism metabolic process;GO:0044699//single-organism process;GO:0008152//metabolic process
Gene008398	CIL0937S0133	Isoform018506	CIL0937S0133	new	-	Squalene monooxygenase isoform 1; K00511 squalene monooxygenase [EC:1.14.13.132]	Metabolism	Lipid metabolism;Metabolism of terpenoids and polyketides;Global and Overview	ko01100//Metabolic pathways;ko01110//Biosynthesis of secondary metabolites;ko01130//Biosynthesis of antibiotics;ko00100//Steroid biosynthesis;ko00909//Sesquiterpenoid and triterpenoid biosynthesis	K00511	GO:0016020//membrane;GO:0031224//intrinsic component of membrane;GO:0044425//membrane part	GO:1901265//nucleoside phosphate binding;GO:0004497//monooxygenase activity;GO:0016709//oxidoreductase activity, acting on paired donors, with incorporation or reduction of molecular oxygen, NAD(P)H as one donor, and incorporation of one atom of oxygen;GO:1901363//heterocyclic compound binding;GO:0016705//oxidoreductase activity, acting on paired donors, with incorporation or reduction of molecul…	GO:0044710//single-organism metabolic process;GO:0044699//single-organism process;GO:0008152//metabolic process
Gene008399	CIL0937S0137	Isoform018508	CIL0937S0137	new	-	squalene epoxidase 3; K00511 squalene monooxygenase [EC:1.14.13.132]	Metabolism	Lipid metabolism;Metabolism of terpenoids and polyketides;Global and Overview	ko01100//Metabolic pathways;ko01110//Biosynthesis of secondary metabolites;ko01130//Biosynthesis of antibiotics;ko00100//Steroid biosynthesis;ko00909//Sesquiterpenoid and triterpenoid biosynthesis	K00511	GO:0016020//membrane;GO:0031224//intrinsic component of membrane;GO:0044425//membrane part	GO:0004497//monooxygenase activity;GO:0036094//small molecule binding;GO:0016705//oxidoreductase activity, acting on paired donors, with incorporation or reduction of molecular oxygen;GO:0003824//catalytic activity;GO:0005488//binding;GO:1901265//nucleoside phosphate binding;GO:0016491//oxidoreductase activity;GO:0097159//organic cyclic compound binding;GO:1901363//heterocyclic compound binding;G…	GO:0044699//single-organism process;GO:0008152//metabolic process;GO:0044710//single-organism metabolic process
Gene008400	CIL0937S0138	Isoform018510	CIL0937S0138	new	-	Squalene monooxygenase isoform 1; K00511 squalene monooxygenase [EC:1.14.13.132]	Metabolism	Global and Overview;Lipid metabolism;Metabolism of terpenoids and polyketides	ko01100//Metabolic pathways;ko01110//Biosynthesis of secondary metabolites;ko01130//Biosynthesis of antibiotics;ko00100//Steroid biosynthesis;ko00909//Sesquiterpenoid and triterpenoid biosynthesis	K00511	GO:0044425//membrane part;GO:0031224//intrinsic component of membrane;GO:0016020//membrane	GO:0016705//oxidoreductase activity, acting on paired donors, with incorporation or reduction of molecular oxygen;GO:0003824//catalytic activity;GO:0000166//nucleotide binding;GO:0097159//organic cyclic compound binding;GO:0005488//binding;GO:0004497//monooxygenase activity;GO:1901363//heterocyclic compound binding;GO:0016709//oxidoreductase activity, acting on paired donors, with incorporation o…	GO:0044710//single-organism metabolic process;GO:0044699//single-organism process;GO:0008152//metabolic process
Gene009215	CIL0962S0137	Isoform020426	CIL0962S0137	new	-	Plant stearoyl-acyl-carrier-protein desaturase family protein; K03921 acyl-[acyl-carrier-protein] desaturase [EC:1.14.19.2]	Metabolism	Lipid metabolism;Global and Overview	ko01212//Fatty acid metabolism;ko00061//Fatty acid biosynthesis;ko01040//Biosynthesis of unsaturated fatty acids	K03921	GO:0009536//plastid;GO:0043227//membrane-bounded organelle;GO:0005737//cytoplasm;GO:0044444//cytoplasmic part;GO:0044464//cell part;GO:0044424//intracellular part;GO:0005623//cell;GO:0043231//intracellular membrane-bounded organelle;GO:0005622//intracellular;GO:0043226//organelle;GO:0043229//intracellular organelle	GO:0003824//catalytic activity;GO:0016491//oxidoreductase activity;GO:0016717//oxidoreductase activity, acting on paired donors, with oxidation of a pair of donors resulting in the reduction of molecular oxygen to two molecules of water;GO:0016705//oxidoreductase activity, acting on paired donors, with incorporation or reduction of molecular oxygen	GO:0006082//organic acid metabolic process;GO:0071704//organic substance metabolic process;GO:0009987//cellular process;GO:0044281//small molecule metabolic process;GO:0044699//single-organism process;GO:0043436//oxoacid metabolic process;GO:0044763//single-organism cellular process;GO:0006631//fatty acid metabolic process;GO:0006629//lipid metabolic process;GO:0044255//cellular lipid metabolic p…
Gene009220	-	Isoform020444	-	novel	-	Squalene monooxygenase isoform 1; K00511 squalene monooxygenase [EC:1.14.13.132]	Metabolism	Metabolism of terpenoids and polyketides;Lipid metabolism;Global and Overview	ko01100//Metabolic pathways;ko01110//Biosynthesis of secondary metabolites;ko01130//Biosynthesis of antibiotics;ko00100//Steroid biosynthesis;ko00909//Sesquiterpenoid and triterpenoid biosynthesis	K00511	GO:0031224//intrinsic component of membrane;GO:0016020//membrane;GO:0044425//membrane part	GO:0016709//oxidoreductase activity, acting on paired donors, with incorporation or reduction of molecular oxygen, NAD(P)H as one donor, and incorporation of one atom of oxygen;GO:0097159//organic cyclic compound binding;GO:0000166//nucleotide binding;GO:0016491//oxidoreductase activity;GO:0003824//catalytic activity;GO:0036094//small molecule binding;GO:0016705//oxidoreductase activity, acting o…	GO:0008152//metabolic process;GO:0044699//single-organism process;GO:0044710//single-organism metabolic process
Gene011121	CIL1031S0128	Isoform024706	CIL1031S0128	new	-	monogalactosyldiacylglycerol synthase, chloroplastic; K03715 1,2-diacylglycerol 3-beta-galactosyltransferase [EC:2.4.1.46]	Metabolism	Lipid metabolism;Global and Overview	ko01100//Metabolic pathways;ko00561//Glycerolipid metabolism	K03715	GO:0009528//plastid inner membrane;GO:0031975//envelope;GO:0005622//intracellular;GO:0044464//cell part;GO:0043231//intracellular membrane-bounded organelle;GO:0031090//organelle membrane;GO:0043227//membrane-bounded organelle;GO:0005737//cytoplasm;GO:0009536//plastid;GO:0044422//organelle part;GO:0044446//intracellular organelle part;GO:0019866//organelle inner membrane;GO:0016020//membrane;GO:0…	GO:0016757//transferase activity, transferring glycosyl groups;GO:0008194//UDP-glycosyltransferase activity;GO:0016740//transferase activity;GO:0008378//galactosyltransferase activity;GO:0003824//catalytic activity;GO:0035250//UDP-galactosyltransferase activity;GO:0016758//transferase activity, transferring hexosyl groups;GO:0005488//binding	GO:0043207//response to external biotic stimulus;GO:0009607//response to biotic stimulus;GO:0071704//organic substance metabolic process;GO:0009987//cellular process;GO:0044237//cellular metabolic process;GO:0001101//response to acid chemical;GO:0008152//metabolic process;GO:0044763//single-organism cellular process;GO:0044710//single-organism metabolic process;GO:0030258//lipid modification;GO:0…
Gene011121	CIL1031S0128	Isoform024707	CIL1031S0128	new	-	monogalactosyldiacylglycerol synthase, chloroplastic; K03715 1,2-diacylglycerol 3-beta-galactosyltransferase [EC:2.4.1.46]	Metabolism	Lipid metabolism;Global and Overview	ko01100//Metabolic pathways;ko00561//Glycerolipid metabolism	K03715	GO:0044464//cell part;GO:0043226//organelle;GO:0031090//organelle membrane;GO:0044435//plastid part;GO:0009536//plastid;GO:0005622//intracellular;GO:0043227//membrane-bounded organelle;GO:0031967//organelle envelope;GO:0044444//cytoplasmic part;GO:0005623//cell;GO:0043231//intracellular membrane-bounded organelle;GO:0009526//plastid envelope;GO:0016020//membrane;GO:0043229//intracellular organell…	GO:0005488//binding;GO:0016758//transferase activity, transferring hexosyl groups;GO:0008378//galactosyltransferase activity;GO:0016757//transferase activity, transferring glycosyl groups;GO:0008194//UDP-glycosyltransferase activity;GO:0003824//catalytic activity;GO:0035250//UDP-galactosyltransferase activity;GO:0016740//transferase activity	GO:0032502//developmental process;GO:0061024//membrane organization;GO:0030258//lipid modification;GO:0044763//single-organism cellular process;GO:0008152//metabolic process;GO:0009987//cellular process;GO:0001101//response to acid chemical;GO:0016043//cellular component organization;GO:0006082//organic acid metabolic process;GO:0032787//monocarboxylic acid metabolic process;GO:0044767//single-or…
Gene011967	CIL1064S0022	Isoform026584	CIL1064S0022	new	-	squalene monooxygenase; K00511 squalene monooxygenase [EC:1.14.13.132]	Metabolism	Metabolism of terpenoids and polyketides;Lipid metabolism;Global and Overview	ko01100//Metabolic pathways;ko01110//Biosynthesis of secondary metabolites;ko01130//Biosynthesis of antibiotics;ko00100//Steroid biosynthesis;ko00909//Sesquiterpenoid and triterpenoid biosynthesis	K00511	-	-	-
Gene012280	CIL1077S0009	Isoform027246	CIL1077S0009	new	-	alpha-galactosidase; K07407 alpha-galactosidase [EC:3.2.1.22]	Metabolism	Carbohydrate metabolism;Glycan biosynthesis and metabolism;Lipid metabolism	ko00052//Galactose metabolism;ko00561//Glycerolipid metabolism;ko00600//Sphingolipid metabolism;ko00603//Glycosphingolipid biosynthesis - globo series	K07407	-	GO:0015925//galactosidase activity;GO:0004553//hydrolase activity, hydrolyzing O-glycosyl compounds;GO:0016787//hydrolase activity;GO:0016798//hydrolase activity, acting on glycosyl bonds;GO:0004557//alpha-galactosidase activity;GO:0003824//catalytic activity	GO:0008152//metabolic process;GO:0044238//primary metabolic process
Gene012660	CIL1090S0079	Isoform028064	CIL1090S0079	new	-	glycerol-3-phosphate acyltransferase, chloroplastic; K00630 glycerol-3-phosphate O-acyltransferase [EC:2.3.1.15]	Metabolism	Global and Overview;Lipid metabolism	ko01100//Metabolic pathways;ko01110//Biosynthesis of secondary metabolites;ko00564//Glycerophospholipid metabolism;ko00561//Glycerolipid metabolism	K00630	GO:0009532//plastid stroma;GO:0043231//intracellular membrane-bounded organelle;GO:0043226//organelle;GO:0005622//intracellular;GO:0009536//plastid;GO:0044444//cytoplasmic part;GO:0044424//intracellular part;GO:0043227//membrane-bounded organelle;GO:0044446//intracellular organelle part;GO:0005737//cytoplasm;GO:0044422//organelle part;GO:0043229//intracellular organelle;GO:0005623//cell;GO:004443…	GO:0016740//transferase activity;GO:0003824//catalytic activity	GO:0044271//cellular nitrogen compound biosynthetic process;GO:0006633//fatty acid biosynthetic process;GO:0046471//phosphatidylglycerol metabolic process;GO:0046341//CDP-diacylglycerol metabolic process;GO:0034641//cellular nitrogen compound metabolic process;GO:0006778//porphyrin-containing compound metabolic process;GO:0032787//monocarboxylic acid metabolic process;GO:0051188//cofactor biosynt…
Gene012660	CIL1090S0079	Isoform028065	CIL1090S0079	new	-	glycerol-3-phosphate acyltransferase, chloroplastic; K00630 glycerol-3-phosphate O-acyltransferase [EC:2.3.1.15]	Metabolism	Global and Overview;Lipid metabolism	ko01100//Metabolic pathways;ko01110//Biosynthesis of secondary metabolites;ko00564//Glycerophospholipid metabolism;ko00561//Glycerolipid metabolism	K00630	GO:0009536//plastid;GO:0043229//intracellular organelle;GO:0044424//intracellular part;GO:0044435//plastid part;GO:0043226//organelle;GO:0044444//cytoplasmic part;GO:0005622//intracellular;GO:0043231//intracellular membrane-bounded organelle;GO:0005623//cell;GO:0044422//organelle part;GO:0043227//membrane-bounded organelle;GO:0009532//plastid stroma;GO:0044464//cell part;GO:0005737//cytoplasm;GO:…	GO:0016740//transferase activity;GO:0003824//catalytic activity	GO:0006793//phosphorus metabolic process;GO:1901362//organic cyclic compound biosynthetic process;GO:0019438//aromatic compound biosynthetic process;GO:0033013//tetrapyrrole metabolic process;GO:1901564//organonitrogen compound metabolic process;GO:0008152//metabolic process;GO:0044271//cellular nitrogen compound biosynthetic process;GO:0006721//terpenoid metabolic process;GO:0071704//organic sub…
Gene013284	CIL1113S0002	Isoform029579	CIL1113S0002	new	-	enoyl-[acyl-carrier-protein] reductase [NADH], chloroplastic; K00208 enoyl-[acyl-carrier protein] reductase I [EC:1.3.1.9 1.3.1.10]	Metabolism	Global and Overview;Lipid metabolism;Metabolism of cofactors and vitamins	ko01100//Metabolic pathways;ko01212//Fatty acid metabolism;ko00061//Fatty acid biosynthesis;ko00780//Biotin metabolism	K00208	-	-	-
Gene013284	CIL1113S0002	Isoform029581	CIL1113S0002	new	-	enoyl-[acyl-carrier-protein] reductase [NADH], chloroplastic-like; K00208 enoyl-[acyl-carrier protein] reductase I [EC:1.3.1.9 1.3.1.10]	Metabolism	Global and Overview;Lipid metabolism;Metabolism of cofactors and vitamins	ko01100//Metabolic pathways;ko01212//Fatty acid metabolism;ko00061//Fatty acid biosynthesis;ko00780//Biotin metabolism	K00208	-	-	-
Gene013377	CIL1119S0061	Isoform029790	CIL1119S0061	new	-	omega-6 fatty acid desaturase, chloroplastic; K10255 omega-6 fatty acid desaturase (delta-12 desaturase) [EC:1.14.19.-]	Metabolism	Lipid metabolism;Global and Overview	ko01212//Fatty acid metabolism;ko01040//Biosynthesis of unsaturated fatty acids	K10255	GO:0043227//membrane-bounded organelle;GO:0044425//membrane part;GO:0019866//organelle inner membrane;GO:0044435//plastid part;GO:0044424//intracellular part;GO:0044446//intracellular organelle part;GO:0031967//organelle envelope;GO:0043226//organelle;GO:0044444//cytoplasmic part;GO:0005623//cell;GO:0009536//plastid;GO:0043231//intracellular membrane-bounded organelle;GO:0044464//cell part;GO:004…	GO:0003824//catalytic activity	GO:1901362//organic cyclic compound biosynthetic process;GO:0006139//nucleobase-containing compound metabolic process;GO:0016053//organic acid biosynthetic process;GO:1901360//organic cyclic compound metabolic process;GO:0006090//pyruvate metabolic process;GO:0006633//fatty acid biosynthetic process;GO:0019222//regulation of metabolic process;GO:0051246//regulation of protein metabolic process;GO…
Gene013377	CIL1119S0061	Isoform029791	CIL1119S0061	new	-	omega-6 fatty acid desaturase, chloroplastic; K10255 omega-6 fatty acid desaturase (delta-12 desaturase) [EC:1.14.19.-]	Metabolism	Global and Overview;Lipid metabolism	ko01212//Fatty acid metabolism;ko01040//Biosynthesis of unsaturated fatty acids	K10255	GO:0031975//envelope;GO:0044425//membrane part;GO:0009528//plastid inner membrane;GO:0043227//membrane-bounded organelle;GO:0043229//intracellular organelle;GO:0005623//cell;GO:0031090//organelle membrane;GO:0031224//intrinsic component of membrane;GO:0009526//plastid envelope;GO:0005737//cytoplasm;GO:0042170//plastid membrane;GO:0044464//cell part;GO:0016020//membrane;GO:0044444//cytoplasmic par…	GO:0003824//catalytic activity	GO:0006721//terpenoid metabolic process;GO:0031399//regulation of protein modification process;GO:0006644//phospholipid metabolic process;GO:0044281//small molecule metabolic process;GO:0044699//single-organism process;GO:0043436//oxoacid metabolic process;GO:0006790//sulfur compound metabolic process;GO:0032787//monocarboxylic acid metabolic process;GO:1901360//organic cyclic compound metabolic …
Gene014432	CIL1153S0034,CIL1153S0037,CIL1153S0043,CIL1153S0044,CIL1153S0045	Isoform032183	-	novel	-	probable trans-2-enoyl-CoA reductase, mitochondrial; K07512 mitochondrial trans-2-enoyl-CoA reductase [EC:1.3.1.38]	Metabolism	Lipid metabolism;Global and Overview	ko01100//Metabolic pathways;ko01212//Fatty acid metabolism;ko00062//Fatty acid elongation	K07512	-	-	-
Gene014594	CIL1157S0009	Isoform032701	CIL1157S0009	new	-	GPAT; glycerol-3-phosphate acyltransferase, chloroplastic; K00630 glycerol-3-phosphate O-acyltransferase [EC:2.3.1.15]	Metabolism	Global and Overview;Lipid metabolism	ko01100//Metabolic pathways;ko01110//Biosynthesis of secondary metabolites;ko00564//Glycerophospholipid metabolism;ko00561//Glycerolipid metabolism	K00630	-	GO:0016740//transferase activity;GO:0003824//catalytic activity	GO:0008152//metabolic process
Gene015696	CIL1204S0021	Isoform035186	CIL1204S0021	new	-	glyoxysomal fatty acid beta-oxidation multifunctional protein MFP-a; K10527 enoyl-CoA hydratase/3-hydroxyacyl-CoA dehydrogenase [EC:4.2.1.17 1.1.1.35 1.1.1.211]	Metabolism	Lipid metabolism;Global and Overview	ko01100//Metabolic pathways;ko01110//Biosynthesis of secondary metabolites;ko01212//Fatty acid metabolism;ko00071//Fatty acid degradation;ko00592//alpha-Linolenic acid metabolism	K10527	GO:0043228//non-membrane-bounded organelle;GO:0030312//external encapsulating structure;GO:0043229//intracellular organelle;GO:0044444//cytoplasmic part;GO:0071944//cell periphery;GO:0005737//cytoplasm;GO:0005911//cell-cell junction;GO:0043227//membrane-bounded organelle;GO:0005777//peroxisome;GO:0043232//intracellular non-membrane-bounded organelle;GO:0005622//intracellular;GO:0044424//intracell…	GO:0016856//racemase and epimerase activity, acting on hydroxy acids and derivatives;GO:0016829//lyase activity;GO:0016863//intramolecular oxidoreductase activity, transposing C=C bonds;GO:0016616//oxidoreductase activity, acting on the CH-OH group of donors, NAD or NADP as acceptor;GO:0016860//intramolecular oxidoreductase activity;GO:0016853//isomerase activity;GO:0016614//oxidoreductase activi…	GO:0044282//small molecule catabolic process;GO:0044238//primary metabolic process;GO:0016042//lipid catabolic process;GO:0009056//catabolic process;GO:0043170//macromolecule metabolic process;GO:0006629//lipid metabolic process;GO:0044712//single-organism catabolic process;GO:0006461//protein complex assembly;GO:0008152//metabolic process;GO:0035966//response to topologically incorrect protein;G…
Gene015697	CIL1204S0022	Isoform035188	CIL1204S0022	new	-	Multifunctional protein 2; K10527 enoyl-CoA hydratase/3-hydroxyacyl-CoA dehydrogenase [EC:4.2.1.17 1.1.1.35 1.1.1.211]	Metabolism	Global and Overview;Lipid metabolism	ko01100//Metabolic pathways;ko01110//Biosynthesis of secondary metabolites;ko01212//Fatty acid metabolism;ko00071//Fatty acid degradation;ko00592//alpha-Linolenic acid metabolism	K10527	GO:0043227//membrane-bounded organelle;GO:0005623//cell;GO:0030054//cell junction;GO:0005737//cytoplasm;GO:0043229//intracellular organelle;GO:0005777//peroxisome;GO:0043232//intracellular non-membrane-bounded organelle;GO:0030312//external encapsulating structure;GO:0071944//cell periphery;GO:0005911//cell-cell junction;GO:0044464//cell part;GO:0043226//organelle;GO:0044424//intracellular part;G…	GO:0016856//racemase and epimerase activity, acting on hydroxy acids and derivatives;GO:0016835//carbon-oxygen lyase activity;GO:0016853//isomerase activity;GO:0016829//lyase activity;GO:0016836//hydro-lyase activity;GO:0016491//oxidoreductase activity;GO:0016860//intramolecular oxidoreductase activity;GO:0016614//oxidoreductase activity, acting on CH-OH group of donors;GO:0016616//oxidoreductase…	GO:0016042//lipid catabolic process;GO:0043933//macromolecular complex subunit organization;GO:0009404//toxin metabolic process;GO:0006631//fatty acid metabolic process;GO:0022607//cellular component assembly;GO:0044237//cellular metabolic process;GO:0065003//macromolecular complex assembly;GO:0008152//metabolic process;GO:0044265//cellular macromolecule catabolic process;GO:0044255//cellular lip…
Gene016035	CIL1221S0019,CIL1221S0021	Isoform035965	CIL1221S0019	new	-	enoyl-[acyl-carrier-protein] reductase [NADH], chloroplastic; K00208 enoyl-[acyl-carrier protein] reductase I [EC:1.3.1.9 1.3.1.10]	Metabolism	Global and Overview;Metabolism of cofactors and vitamins;Lipid metabolism	ko01100//Metabolic pathways;ko01212//Fatty acid metabolism;ko00061//Fatty acid biosynthesis;ko00780//Biotin metabolism	K00208	-	-	-
Gene016035	CIL1221S0019,CIL1221S0021	Isoform035968	CIL1221S0019,CIL1221S0021	new	-	enoyl-[acyl-carrier-protein] reductase [NADH], chloroplastic; K00208 enoyl-[acyl-carrier protein] reductase I [EC:1.3.1.9 1.3.1.10]	Metabolism	Global and Overview;Lipid metabolism;Metabolism of cofactors and vitamins	ko01100//Metabolic pathways;ko01212//Fatty acid metabolism;ko00061//Fatty acid biosynthesis;ko00780//Biotin metabolism	K00208	-	-	-
Gene016035	CIL1221S0019,CIL1221S0021	Isoform035970	CIL1221S0019	new	-	POPTRDRAFT_555276; ENOYL-ACP REDUCTASE 1 family protein; K00208 enoyl-[acyl-carrier protein] reductase I [EC:1.3.1.9 1.3.1.10]	Metabolism	Global and Overview;Metabolism of cofactors and vitamins;Lipid metabolism	ko01100//Metabolic pathways;ko01212//Fatty acid metabolism;ko00061//Fatty acid biosynthesis;ko00780//Biotin metabolism	K00208	-	-	-
Gene002333	CIL1400S0019	Isoform005133	CIL1400S0019	known	--	PREDICTED: acyl-protein thioesterase 2-like isoform X1 [Juglans regia]	Metabolism	Lipid metabolism	ko00564//Glycerophospholipid metabolism	K06130	-	GO:0016787//hydrolase activity;GO:0016788//hydrolase activity, acting on ester bonds;GO:0003824//catalytic activity	-
Gene002013	-	Isoform004425	-	novel	3BETAHSD/D1	3beta-hydroxysteroid-dehydrogenase/decarboxylase isoform 2; K07748 sterol-4alpha-carboxylate 3-dehydrogenase (decarboxylating) [EC:1.1.1.170]	Metabolism	Lipid metabolism;Global and Overview	ko01100//Metabolic pathways;ko01130//Biosynthesis of antibiotics;ko00100//Steroid biosynthesis	K07748	-	-	-
Gene002013	-	Isoform004426	-	novel	3BETAHSD/D2	3beta-hydroxysteroid-dehydrogenase/decarboxylase isoform 2; K07748 sterol-4alpha-carboxylate 3-dehydrogenase (decarboxylating) [EC:1.1.1.170]	Metabolism	Global and Overview;Lipid metabolism	ko01100//Metabolic pathways;ko01130//Biosynthesis of antibiotics;ko00100//Steroid biosynthesis	K07748	-	-	GO:0008152//metabolic process;GO:0044699//single-organism process;GO:0044710//single-organism metabolic process
Gene002014	-	Isoform004428	-	novel	3BETAHSD/D2	3beta-hydroxysteroid-dehydrogenase/decarboxylase isoform 2; K07748 sterol-4alpha-carboxylate 3-dehydrogenase (decarboxylating) [EC:1.1.1.170]	Metabolism	Global and Overview;Lipid metabolism	ko01100//Metabolic pathways;ko01130//Biosynthesis of antibiotics;ko00100//Steroid biosynthesis	K07748	-	GO:0003824//catalytic activity;GO:0016614//oxidoreductase activity, acting on CH-OH group of donors;GO:0016491//oxidoreductase activity	GO:0008202//steroid metabolic process;GO:1901360//organic cyclic compound metabolic process;GO:0044238//primary metabolic process;GO:0008152//metabolic process;GO:0071704//organic substance metabolic process;GO:0044699//single-organism process;GO:0044710//single-organism metabolic process;GO:0006629//lipid metabolic process
Gene002014	-	Isoform004429	-	novel	3BETAHSD/D2	3beta-hydroxysteroid-dehydrogenase/decarboxylase isoform 2; K07748 sterol-4alpha-carboxylate 3-dehydrogenase (decarboxylating) [EC:1.1.1.170]	Metabolism	Lipid metabolism;Global and Overview	ko01100//Metabolic pathways;ko01130//Biosynthesis of antibiotics;ko00100//Steroid biosynthesis	K07748	-	GO:0016614//oxidoreductase activity, acting on CH-OH group of donors;GO:0003824//catalytic activity;GO:0016491//oxidoreductase activity	GO:0044710//single-organism metabolic process;GO:1901360//organic cyclic compound metabolic process;GO:0006629//lipid metabolic process;GO:0044699//single-organism process;GO:0008152//metabolic process;GO:0071704//organic substance metabolic process;GO:0044238//primary metabolic process;GO:0008202//steroid metabolic process
Gene007294	CIL0908S0119	Isoform016032	CIL0908S0119	new	3BETAHSD/D3	3beta-hydroxysteroid-dehydrogenase/decarboxylase isoform 3; K07748 sterol-4alpha-carboxylate 3-dehydrogenase (decarboxylating) [EC:1.1.1.170]	Metabolism	Lipid metabolism;Global and Overview	ko01100//Metabolic pathways;ko01130//Biosynthesis of antibiotics;ko00100//Steroid biosynthesis	K07748	GO:0043226//organelle;GO:0044424//intracellular part;GO:0016020//membrane;GO:0005622//intracellular;GO:0043229//intracellular organelle;GO:0043227//membrane-bounded organelle;GO:0043231//intracellular membrane-bounded organelle;GO:0044425//membrane part;GO:0044464//cell part;GO:0005623//cell	GO:0016616//oxidoreductase activity, acting on the CH-OH group of donors, NAD or NADP as acceptor;GO:0016614//oxidoreductase activity, acting on CH-OH group of donors;GO:0003824//catalytic activity;GO:0016491//oxidoreductase activity	GO:0044711//single-organism biosynthetic process;GO:0008610//lipid biosynthetic process;GO:1901360//organic cyclic compound metabolic process;GO:1901362//organic cyclic compound biosynthetic process;GO:0006694//steroid biosynthetic process;GO:1901576//organic substance biosynthetic process;GO:0044699//single-organism process;GO:0008202//steroid metabolic process;GO:0044238//primary metabolic proc…
Gene007294	CIL0908S0119	Isoform016033	CIL0908S0119	new	3BETAHSD/D3	3beta-hydroxysteroid-dehydrogenase/decarboxylase isoform 3; K07748 sterol-4alpha-carboxylate 3-dehydrogenase (decarboxylating) [EC:1.1.1.170]	Metabolism	Global and Overview;Lipid metabolism	ko01100//Metabolic pathways;ko01130//Biosynthesis of antibiotics;ko00100//Steroid biosynthesis	K07748	-	GO:0003824//catalytic activity;GO:0016616//oxidoreductase activity, acting on the CH-OH group of donors, NAD or NADP as acceptor;GO:0016614//oxidoreductase activity, acting on CH-OH group of donors;GO:0016491//oxidoreductase activity	GO:0008202//steroid metabolic process;GO:0006629//lipid metabolic process;GO:0008152//metabolic process;GO:0044699//single-organism process;GO:0071704//organic substance metabolic process;GO:0044238//primary metabolic process;GO:1901360//organic cyclic compound metabolic process;GO:0044710//single-organism metabolic process
Gene007294	CIL0908S0119	Isoform016034	CIL0908S0119	new	3BETAHSD/D3	3beta-hydroxysteroid-dehydrogenase/decarboxylase isoform 3; K07748 sterol-4alpha-carboxylate 3-dehydrogenase (decarboxylating) [EC:1.1.1.170]	Metabolism	Global and Overview;Lipid metabolism	ko01100//Metabolic pathways;ko01130//Biosynthesis of antibiotics;ko00100//Steroid biosynthesis	K07748	-	GO:0003824//catalytic activity;GO:0016614//oxidoreductase activity, acting on CH-OH group of donors;GO:0016491//oxidoreductase activity;GO:0016616//oxidoreductase activity, acting on the CH-OH group of donors, NAD or NADP as acceptor	GO:0044710//single-organism metabolic process;GO:0044699//single-organism process;GO:0008152//metabolic process
Gene005696	CIL0320S0003	Isoform012558	CIL0320S0003	known	4CLL5	PREDICTED: 4-coumarate--CoA ligase-like 5 [Juglans regia]	Metabolism	Global and Overview;Lipid metabolism	ko01100//Metabolic pathways;ko01110//Biosynthesis of secondary metabolites;ko00592//alpha-Linolenic acid metabolism	K10526	GO:0044444//cytoplasmic part;GO:0005737//cytoplasm;GO:0005623//cell;GO:0044424//intracellular part;GO:0043226//organelle;GO:0005622//intracellular;GO:0043231//intracellular membrane-bounded organelle;GO:0044464//cell part;GO:0043229//intracellular organelle;GO:0042579//microbody;GO:0043227//membrane-bounded organelle	GO:0032549//ribonucleoside binding;GO:0001882//nucleoside binding;GO:0097367//carbohydrate derivative binding;GO:0036094//small molecule binding;GO:0004497//monooxygenase activity;GO:0016491//oxidoreductase activity;GO:1901363//heterocyclic compound binding;GO:0032550//purine ribonucleoside binding;GO:0001883//purine nucleoside binding;GO:0016703//oxidoreductase activity, acting on single donors …	GO:0051707//response to other organism;GO:1901698//response to nitrogen compound;GO:0044281//small molecule metabolic process;GO:0042221//response to chemical;GO:0043207//response to external biotic stimulus;GO:0009605//response to external stimulus;GO:0032787//monocarboxylic acid metabolic process;GO:0010243//response to organonitrogen compound;GO:0009607//response to biotic stimulus;GO:0044237/…
Gene013141	CIL1107S0050	Isoform029240	CIL1107S0050	new	4CLL5	4-coumarate--CoA ligase-like 5-like; K10526 OPC-8:0 CoA ligase 1 [EC:6.2.1.-]	Metabolism	Lipid metabolism;Global and Overview	ko01100//Metabolic pathways;ko01110//Biosynthesis of secondary metabolites;ko00592//alpha-Linolenic acid metabolism	K10526	GO:0043226//organelle;GO:0043227//membrane-bounded organelle;GO:0043229//intracellular organelle;GO:0042579//microbody;GO:0005737//cytoplasm;GO:0044424//intracellular part;GO:0005623//cell;GO:0043231//intracellular membrane-bounded organelle;GO:0044444//cytoplasmic part;GO:0044464//cell part;GO:0005622//intracellular	GO:0005488//binding;GO:1901363//heterocyclic compound binding;GO:0003824//catalytic activity;GO:0001882//nucleoside binding;GO:0097367//carbohydrate derivative binding;GO:0097159//organic cyclic compound binding;GO:0032550//purine ribonucleoside binding;GO:0036094//small molecule binding;GO:0032549//ribonucleoside binding;GO:0001883//purine nucleoside binding	GO:0001101//response to acid chemical;GO:0010033//response to organic substance;GO:0044281//small molecule metabolic process;GO:0019752//carboxylic acid metabolic process;GO:0051707//response to other organism;GO:0071704//organic substance metabolic process;GO:0050896//response to stimulus;GO:0009607//response to biotic stimulus;GO:0009719//response to endogenous stimulus;GO:1901698//response to …
Gene010621	CIL1015S0015	Isoform023609	CIL1015S0015	new	AAE16	probable acyl-activating enzyme 16, chloroplastic; K01897 long-chain acyl-CoA synthetase [EC:6.2.1.3]	Cellular Processes;Metabolism	Transport and catabolism;Lipid metabolism;Global and Overview	ko01100//Metabolic pathways;ko01212//Fatty acid metabolism;ko04146//Peroxisome;ko00061//Fatty acid biosynthesis;ko00071//Fatty acid degradation	K01897	-	-	-
Gene010621	CIL1015S0015	Isoform023610	CIL1015S0015	new	AAE16	probable acyl-activating enzyme 16, chloroplastic; K01897 long-chain acyl-CoA synthetase [EC:6.2.1.3]	Cellular Processes;Metabolism	Global and Overview;Lipid metabolism;Transport and catabolism	ko01100//Metabolic pathways;ko01212//Fatty acid metabolism;ko04146//Peroxisome;ko00061//Fatty acid biosynthesis;ko00071//Fatty acid degradation	K01897	-	GO:0003824//catalytic activity	-
Gene010621	CIL1015S0015	Isoform023611	CIL1015S0015	new	AAE16	probable acyl-activating enzyme 16, chloroplastic; K01897 long-chain acyl-CoA synthetase [EC:6.2.1.3]	Metabolism;Cellular Processes	Global and Overview;Lipid metabolism;Transport and catabolism	ko01100//Metabolic pathways;ko01212//Fatty acid metabolism;ko04146//Peroxisome;ko00061//Fatty acid biosynthesis;ko00071//Fatty acid degradation	K01897	-	GO:0003824//catalytic activity	-
Gene003444	CIL1481S0031,CIL1481S0032	Isoform007463	CIL1481S0031,CIL1481S0032	new	AAPT1	choline/ethanolaminephosphotransferase 1; K00993 ethanolaminephosphotransferase [EC:2.7.8.1]	Metabolism	Lipid metabolism;Global and Overview	ko01100//Metabolic pathways;ko01110//Biosynthesis of secondary metabolites;ko00564//Glycerophospholipid metabolism;ko00565//Ether lipid metabolism	K00993	GO:0043226//organelle;GO:0043229//intracellular organelle;GO:0044424//intracellular part;GO:0044425//membrane part;GO:0043227//membrane-bounded organelle;GO:0031224//intrinsic component of membrane;GO:0016020//membrane;GO:0005622//intracellular;GO:0005623//cell;GO:0044464//cell part;GO:0043231//intracellular membrane-bounded organelle	GO:0043167//ion binding;GO:0016740//transferase activity;GO:0016772//transferase activity, transferring phosphorus-containing groups;GO:0016780//phosphotransferase activity, for other substituted phosphate groups;GO:0005488//binding;GO:0017169//CDP-alcohol phosphatidyltransferase activity;GO:0043169//cation binding;GO:0003824//catalytic activity	GO:0042221//response to chemical;GO:0010035//response to inorganic substance;GO:0044238//primary metabolic process;GO:0006650//glycerophospholipid metabolic process;GO:0046486//glycerolipid metabolic process;GO:0044699//single-organism process;GO:0009987//cellular process;GO:0044710//single-organism metabolic process;GO:0008152//metabolic process;GO:0010038//response to metal ion;GO:0006793//phos…
Gene003444	CIL1481S0031,CIL1481S0032	Isoform007464	CIL1481S0031,CIL1481S0032	new	AAPT1	choline/ethanolaminephosphotransferase 1; K00993 ethanolaminephosphotransferase [EC:2.7.8.1]	Metabolism	Lipid metabolism;Global and Overview	ko01100//Metabolic pathways;ko01110//Biosynthesis of secondary metabolites;ko00564//Glycerophospholipid metabolism;ko00565//Ether lipid metabolism	K00993	GO:0005623//cell;GO:0044425//membrane part;GO:0005622//intracellular;GO:0044464//cell part;GO:0043231//intracellular membrane-bounded organelle;GO:0043229//intracellular organelle;GO:0043226//organelle;GO:0031224//intrinsic component of membrane;GO:0044424//intracellular part;GO:0016020//membrane;GO:0043227//membrane-bounded organelle	GO:0016780//phosphotransferase activity, for other substituted phosphate groups;GO:0017169//CDP-alcohol phosphatidyltransferase activity;GO:0016740//transferase activity;GO:0005488//binding;GO:0003824//catalytic activity;GO:0016772//transferase activity, transferring phosphorus-containing groups;GO:0043167//ion binding;GO:0043169//cation binding	GO:0008152//metabolic process;GO:0006793//phosphorus metabolic process;GO:0009987//cellular process;GO:0006796//phosphate-containing compound metabolic process;GO:0046486//glycerolipid metabolic process;GO:0019637//organophosphate metabolic process;GO:0071704//organic substance metabolic process;GO:0050896//response to stimulus;GO:0044255//cellular lipid metabolic process;GO:0010035//response to …
Gene003444	CIL1481S0031,CIL1481S0032	Isoform007466	CIL1481S0031,CIL1481S0032	new	AAPT1	choline/ethanolaminephosphotransferase 1; K00993 ethanolaminephosphotransferase [EC:2.7.8.1]	Metabolism	Global and Overview;Lipid metabolism	ko01100//Metabolic pathways;ko01110//Biosynthesis of secondary metabolites;ko00564//Glycerophospholipid metabolism;ko00565//Ether lipid metabolism	K00993	GO:0043229//intracellular organelle;GO:0043227//membrane-bounded organelle;GO:0043226//organelle;GO:0016020//membrane;GO:0043231//intracellular membrane-bounded organelle;GO:0044425//membrane part;GO:0044464//cell part;GO:0044424//intracellular part;GO:0005622//intracellular;GO:0005623//cell;GO:0031224//intrinsic component of membrane	GO:0016772//transferase activity, transferring phosphorus-containing groups;GO:0043167//ion binding;GO:0005488//binding;GO:0043169//cation binding;GO:0003824//catalytic activity;GO:0016740//transferase activity;GO:0017169//CDP-alcohol phosphatidyltransferase activity;GO:0016780//phosphotransferase activity, for other substituted phosphate groups	GO:0044699//single-organism process;GO:0042221//response to chemical;GO:0010035//response to inorganic substance;GO:0019637//organophosphate metabolic process;GO:0006629//lipid metabolic process;GO:0046337//phosphatidylethanolamine metabolic process;GO:0006796//phosphate-containing compound metabolic process;GO:0044763//single-organism cellular process;GO:0044238//primary metabolic process;GO:004…
Gene005341	CIL0228S0008	Isoform011790	CIL0228S0008	new	AAPT1	choline/ethanolaminephosphotransferase 1; K00993 ethanolaminephosphotransferase [EC:2.7.8.1]	Metabolism	Global and Overview;Lipid metabolism	ko01100//Metabolic pathways;ko01110//Biosynthesis of secondary metabolites;ko00564//Glycerophospholipid metabolism;ko00565//Ether lipid metabolism	K00993	GO:0043226//organelle;GO:0043227//membrane-bounded organelle;GO:0005623//cell;GO:0016020//membrane;GO:0005622//intracellular;GO:0044464//cell part;GO:0043231//intracellular membrane-bounded organelle;GO:0043229//intracellular organelle;GO:0031224//intrinsic component of membrane;GO:0044425//membrane part;GO:0044424//intracellular part	GO:0003824//catalytic activity;GO:0016780//phosphotransferase activity, for other substituted phosphate groups;GO:0043169//cation binding;GO:0005488//binding;GO:0016772//transferase activity, transferring phosphorus-containing groups;GO:0016740//transferase activity;GO:0043167//ion binding;GO:0017169//CDP-alcohol phosphatidyltransferase activity	GO:0044238//primary metabolic process;GO:0019637//organophosphate metabolic process;GO:0008152//metabolic process;GO:0006796//phosphate-containing compound metabolic process;GO:0046486//glycerolipid metabolic process;GO:0044763//single-organism cellular process;GO:0042221//response to chemical;GO:0044699//single-organism process;GO:0046337//phosphatidylethanolamine metabolic process;GO:0009987//c…
Gene003444	CIL1481S0031,CIL1481S0032	Isoform007465	CIL1481S0031	new	AAPT2	choline/ethanolaminephosphotransferase 2-like	Metabolism	Global and Overview;Lipid metabolism	ko01100//Metabolic pathways;ko01110//Biosynthesis of secondary metabolites;ko00564//Glycerophospholipid metabolism;ko00565//Ether lipid metabolism	K00993	-	-	-
Gene011778	CIL1057S0094	Isoform026222	CIL1057S0094	new	AAT1	Acetoacetyl-CoA thiolase 2 isoform 1; K00626 acetyl-CoA C-acetyltransferase [EC:2.3.1.9]	Metabolism	Global and Overview;Amino acid metabolism;Metabolism of terpenoids and polyketides;Lipid metabolism;Carbohydrate metabolism	ko01100//Metabolic pathways;ko01110//Biosynthesis of secondary metabolites;ko01130//Biosynthesis of antibiotics;ko01120//Microbial metabolism in diverse environments;ko01200//Carbon metabolism;ko00620//Pyruvate metabolism;ko01212//Fatty acid metabolism;ko00630//Glyoxylate and dicarboxylate metabolism;ko00071//Fatty acid degradation;ko00280//Valine, leucine and isoleucine degradation;ko00640//Prop…	K00626	GO:0016020//membrane;GO:0043229//intracellular organelle;GO:0043227//membrane-bounded organelle;GO:0043226//organelle;GO:0005737//cytoplasm;GO:0044444//cytoplasmic part;GO:0005622//intracellular;GO:0044464//cell part;GO:0044424//intracellular part;GO:0005623//cell;GO:0042579//microbody;GO:0043231//intracellular membrane-bounded organelle	GO:0016408//C-acyltransferase activity;GO:0003988//acetyl-CoA C-acyltransferase activity;GO:0016746//transferase activity, transferring acyl groups;GO:0003824//catalytic activity;GO:0016747//transferase activity, transferring acyl groups other than amino-acyl groups;GO:0005488//binding;GO:0043169//cation binding;GO:0043167//ion binding;GO:0016740//transferase activity	GO:0048856//anatomical structure development;GO:0006084//acetyl-CoA metabolic process;GO:0044238//primary metabolic process;GO:0009058//biosynthetic process;GO:0044255//cellular lipid metabolic process;GO:0051186//cofactor metabolic process;GO:1901360//organic cyclic compound metabolic process;GO:0006793//phosphorus metabolic process;GO:0008299//isoprenoid biosynthetic process;GO:0006732//coenzym…
Gene014545	CIL1155S0020	Isoform032575	CIL1155S0020	new	AAT1	acetyl-CoA acetyltransferase, cytosolic 1; K00626 acetyl-CoA C-acetyltransferase [EC:2.3.1.9]	Metabolism	Lipid metabolism;Metabolism of terpenoids and polyketides;Amino acid metabolism;Carbohydrate metabolism;Global and Overview	ko01100//Metabolic pathways;ko01110//Biosynthesis of secondary metabolites;ko01130//Biosynthesis of antibiotics;ko01120//Microbial metabolism in diverse environments;ko01200//Carbon metabolism;ko00620//Pyruvate metabolism;ko01212//Fatty acid metabolism;ko00630//Glyoxylate and dicarboxylate metabolism;ko00071//Fatty acid degradation;ko00280//Valine, leucine and isoleucine degradation;ko00640//Prop…	K00626	GO:0044464//cell part;GO:0043229//intracellular organelle;GO:0044424//intracellular part;GO:0005622//intracellular;GO:0043227//membrane-bounded organelle;GO:0016020//membrane;GO:0005623//cell;GO:0044444//cytoplasmic part;GO:0042579//microbody;GO:0043231//intracellular membrane-bounded organelle;GO:0005737//cytoplasm;GO:0043226//organelle	GO:0016408//C-acyltransferase activity;GO:0003824//catalytic activity;GO:0016740//transferase activity;GO:0016746//transferase activity, transferring acyl groups;GO:0043167//ion binding;GO:0016747//transferase activity, transferring acyl groups other than amino-acyl groups;GO:0003988//acetyl-CoA C-acyltransferase activity;GO:0005488//binding;GO:0043169//cation binding	GO:0046165//alcohol biosynthetic process;GO:0044699//single-organism process;GO:0044281//small molecule metabolic process;GO:0035383//thioester metabolic process;GO:0048468//cell development;GO:0044767//single-organism developmental process;GO:0006722//triterpenoid metabolic process;GO:0032989//cellular component morphogenesis;GO:0009987//cellular process;GO:0044763//single-organism cellular proc…
Gene002291	CIL1396S0001,CIL1396S0002	Isoform005068	CIL1396S0001,CIL1396S0002	new	ACC1	Acetyl-CoA carboxylase 1 isoform 1; K11262 acetyl-CoA carboxylase / biotin carboxylase 1 [EC:6.4.1.2 6.3.4.14]	Metabolism	Global and Overview;Lipid metabolism;Carbohydrate metabolism	ko01100//Metabolic pathways;ko01110//Biosynthesis of secondary metabolites;ko00620//Pyruvate metabolism;ko01212//Fatty acid metabolism;ko00061//Fatty acid biosynthesis;ko00640//Propanoate metabolism	K11262	-	GO:0016421//CoA carboxylase activity;GO:0043167//ion binding;GO:0005488//binding;GO:0001882//nucleoside binding;GO:1901363//heterocyclic compound binding;GO:0016879//ligase activity, forming carbon-nitrogen bonds;GO:0003824//catalytic activity;GO:0097159//organic cyclic compound binding;GO:0043169//cation binding;GO:0036094//small molecule binding;GO:0097367//carbohydrate derivative binding;GO:00…	GO:0009987//cellular process;GO:0044237//cellular metabolic process;GO:0044763//single-organism cellular process;GO:0019752//carboxylic acid metabolic process;GO:0006631//fatty acid metabolic process;GO:0044710//single-organism metabolic process;GO:0044281//small molecule metabolic process;GO:0071704//organic substance metabolic process;GO:0032787//monocarboxylic acid metabolic process;GO:0044238…
Gene002301	CIL1396S0003	Isoform005081	CIL1396S0003	new	ACC1	Acetyl-CoA carboxylase 1 isoform 1; K11262 acetyl-CoA carboxylase / biotin carboxylase 1 [EC:6.4.1.2 6.3.4.14]	Metabolism	Global and Overview;Lipid metabolism;Carbohydrate metabolism	ko01100//Metabolic pathways;ko01110//Biosynthesis of secondary metabolites;ko00620//Pyruvate metabolism;ko01212//Fatty acid metabolism;ko00061//Fatty acid biosynthesis;ko00640//Propanoate metabolism	K11262	-	GO:0097367//carbohydrate derivative binding;GO:0032549//ribonucleoside binding;GO:0016421//CoA carboxylase activity;GO:0001883//purine nucleoside binding;GO:0016879//ligase activity, forming carbon-nitrogen bonds;GO:0043167//ion binding;GO:0003824//catalytic activity;GO:1901363//heterocyclic compound binding;GO:0036094//small molecule binding;GO:0016885//ligase activity, forming carbon-carbon bon…	GO:0006082//organic acid metabolic process;GO:0006631//fatty acid metabolic process;GO:0044255//cellular lipid metabolic process;GO:0043436//oxoacid metabolic process;GO:0071704//organic substance metabolic process;GO:0044763//single-organism cellular process;GO:0032787//monocarboxylic acid metabolic process;GO:0009987//cellular process;GO:0019752//carboxylic acid metabolic process;GO:0044699//si…
Gene002301	CIL1396S0003	Isoform005082	CIL1396S0003	new	ACC1	Acetyl-CoA carboxylase 1 isoform 1; K11262 acetyl-CoA carboxylase / biotin carboxylase 1 [EC:6.4.1.2 6.3.4.14]	Metabolism	Lipid metabolism;Carbohydrate metabolism;Global and Overview	ko01100//Metabolic pathways;ko01110//Biosynthesis of secondary metabolites;ko00620//Pyruvate metabolism;ko01212//Fatty acid metabolism;ko00061//Fatty acid biosynthesis;ko00640//Propanoate metabolism	K11262	-	GO:0001882//nucleoside binding;GO:0016874//ligase activity;GO:0043169//cation binding;GO:0036094//small molecule binding;GO:0032550//purine ribonucleoside binding;GO:0016885//ligase activity, forming carbon-carbon bonds;GO:0097367//carbohydrate derivative binding;GO:0016421//CoA carboxylase activity;GO:0097159//organic cyclic compound binding;GO:0043167//ion binding;GO:1901363//heterocyclic compo…	GO:0019752//carboxylic acid metabolic process;GO:0006629//lipid metabolic process;GO:0032787//monocarboxylic acid metabolic process;GO:0044255//cellular lipid metabolic process;GO:0044238//primary metabolic process;GO:0006631//fatty acid metabolic process;GO:0008152//metabolic process;GO:0044710//single-organism metabolic process;GO:0009987//cellular process;GO:0044237//cellular metabolic process…
Gene015822	CIL1211S0023	Isoform035457	CIL1211S0023	new	ACC1	Acetyl-CoA carboxylase 1 isoform 1; K11262 acetyl-CoA carboxylase / biotin carboxylase 1 [EC:6.4.1.2 6.3.4.14]	Metabolism	Global and Overview;Lipid metabolism;Carbohydrate metabolism	ko01100//Metabolic pathways;ko01110//Biosynthesis of secondary metabolites;ko00620//Pyruvate metabolism;ko01212//Fatty acid metabolism;ko00061//Fatty acid biosynthesis;ko00640//Propanoate metabolism	K11262	-	GO:0016885//ligase activity, forming carbon-carbon bonds;GO:0001883//purine nucleoside binding;GO:0097367//carbohydrate derivative binding;GO:0032549//ribonucleoside binding;GO:0001882//nucleoside binding;GO:0005488//binding;GO:0016421//CoA carboxylase activity;GO:0003824//catalytic activity;GO:0097159//organic cyclic compound binding;GO:0043167//ion binding;GO:0032550//purine ribonucleoside bind…	GO:0071704//organic substance metabolic process;GO:0032787//monocarboxylic acid metabolic process;GO:0044281//small molecule metabolic process;GO:0006082//organic acid metabolic process;GO:0044763//single-organism cellular process;GO:0006631//fatty acid metabolic process;GO:0044238//primary metabolic process;GO:0008152//metabolic process;GO:0044699//single-organism process;GO:0009987//cellular pr…
Gene015822	CIL1211S0023	Isoform035458	CIL1211S0023	new	ACC1	Homomeric Acetyl-CoA Carboxylase (Hom-ACCase) (EC:6.4.1.2); K11262 acetyl-CoA carboxylase / biotin carboxylase 1 [EC:6.4.1.2 6.3.4.14]	Metabolism	Carbohydrate metabolism;Lipid metabolism;Global and Overview	ko01100//Metabolic pathways;ko01110//Biosynthesis of secondary metabolites;ko00620//Pyruvate metabolism;ko01212//Fatty acid metabolism;ko00061//Fatty acid biosynthesis;ko00640//Propanoate metabolism	K11262	-	GO:0097367//carbohydrate derivative binding;GO:1901363//heterocyclic compound binding;GO:0001883//purine nucleoside binding;GO:0043167//ion binding;GO:0032550//purine ribonucleoside binding;GO:0001882//nucleoside binding;GO:0016885//ligase activity, forming carbon-carbon bonds;GO:0016421//CoA carboxylase activity;GO:0097159//organic cyclic compound binding;GO:0043169//cation binding;GO:0016874//l…	GO:0008152//metabolic process;GO:0044763//single-organism cellular process;GO:0044699//single-organism process;GO:0032787//monocarboxylic acid metabolic process;GO:0044710//single-organism metabolic process;GO:0044281//small molecule metabolic process;GO:0019752//carboxylic acid metabolic process;GO:0006631//fatty acid metabolic process;GO:0071704//organic substance metabolic process;GO:0006629//…
Gene000550	CIL1284S0002,CIL1284S0003	Isoform001073	CIL1284S0002,CIL1284S0003	known	accD	acetyl-CoA carboxylase carboxyltransferase beta subunit (chloroplast) [Juglans mandshurica]	Metabolism	Lipid metabolism;Carbohydrate metabolism;Global and Overview	ko01100//Metabolic pathways;ko01110//Biosynthesis of secondary metabolites;ko01200//Carbon metabolism;ko00620//Pyruvate metabolism;ko01212//Fatty acid metabolism;ko00061//Fatty acid biosynthesis;ko00640//Propanoate metabolism	K01963	GO:0044446//intracellular organelle part;GO:0043226//organelle;GO:0044444//cytoplasmic part;GO:0044422//organelle part;GO:0005623//cell;GO:0043231//intracellular membrane-bounded organelle;GO:0043227//membrane-bounded organelle;GO:0005622//intracellular;GO:0005737//cytoplasm;GO:0009532//plastid stroma;GO:0043229//intracellular organelle;GO:0044464//cell part;GO:0009536//plastid;GO:0044435//plasti…	GO:0032549//ribonucleoside binding;GO:0097367//carbohydrate derivative binding;GO:0001882//nucleoside binding;GO:1901363//heterocyclic compound binding;GO:0046872//metal ion binding;GO:0097159//organic cyclic compound binding;GO:0046914//transition metal ion binding;GO:0032550//purine ribonucleoside binding;GO:0016421//CoA carboxylase activity;GO:0016874//ligase activity;GO:0001883//purine nucleo…	GO:0009259//ribonucleotide metabolic process;GO:0044271//cellular nitrogen compound biosynthetic process;GO:0033865//nucleoside bisphosphate metabolic process;GO:0009058//biosynthetic process;GO:0044281//small molecule metabolic process;GO:0072521//purine-containing compound metabolic process;GO:0044238//primary metabolic process;GO:0006807//nitrogen compound metabolic process;GO:0015936//coenzym…
Gene004348	CIL1555S0026	Isoform009482	CIL1555S0026	new	Acer3	alkaline ceramidase 3; K04711 dihydroceramidase [EC:3.5.1.-]	Metabolism	Lipid metabolism	ko00600//Sphingolipid metabolism	K04711	GO:0043231//intracellular membrane-bounded organelle;GO:0043226//organelle;GO:0005622//intracellular;GO:0016020//membrane;GO:0044464//cell part;GO:0005623//cell;GO:0043229//intracellular organelle;GO:0044424//intracellular part;GO:0031224//intrinsic component of membrane;GO:0044425//membrane part;GO:0043227//membrane-bounded organelle	GO:0016787//hydrolase activity;GO:0003824//catalytic activity;GO:0016810//hydrolase activity, acting on carbon-nitrogen (but not peptide) bonds	GO:0071704//organic substance metabolic process;GO:0044710//single-organism metabolic process;GO:0044699//single-organism process;GO:0044238//primary metabolic process;GO:0006643//membrane lipid metabolic process;GO:1901564//organonitrogen compound metabolic process;GO:0044255//cellular lipid metabolic process;GO:0044763//single-organism cellular process;GO:0009987//cellular process;GO:0006665//s…
Gene016192	CIL1230S0006	Isoform036315	CIL1230S0006	new	Acer3	Alkaline phytoceramidase (aPHC); K04711 dihydroceramidase [EC:3.5.1.-]	Metabolism	Lipid metabolism	ko00600//Sphingolipid metabolism	K04711	GO:0005623//cell;GO:0005622//intracellular;GO:0031224//intrinsic component of membrane;GO:0016020//membrane;GO:0043229//intracellular organelle;GO:0043231//intracellular membrane-bounded organelle;GO:0044424//intracellular part;GO:0044464//cell part;GO:0044425//membrane part;GO:0043227//membrane-bounded organelle;GO:0043226//organelle	GO:0003824//catalytic activity;GO:0016787//hydrolase activity;GO:0016810//hydrolase activity, acting on carbon-nitrogen (but not peptide) bonds	GO:0044763//single-organism cellular process;GO:0044710//single-organism metabolic process;GO:0008152//metabolic process;GO:0009987//cellular process;GO:0044699//single-organism process;GO:0071704//organic substance metabolic process;GO:0006629//lipid metabolic process;GO:0006665//sphingolipid metabolic process;GO:1901564//organonitrogen compound metabolic process;GO:0044238//primary metabolic pr…
Gene016192	CIL1230S0006	Isoform036316	CIL1230S0006	new	Acer3	Alkaline phytoceramidase (aPHC); K04711 dihydroceramidase [EC:3.5.1.-]	Metabolism	Lipid metabolism	ko00600//Sphingolipid metabolism	K04711	GO:0043226//organelle;GO:0005622//intracellular;GO:0044464//cell part;GO:0044424//intracellular part;GO:0031224//intrinsic component of membrane;GO:0005623//cell;GO:0043231//intracellular membrane-bounded organelle;GO:0044425//membrane part;GO:0043229//intracellular organelle;GO:0043227//membrane-bounded organelle;GO:0016020//membrane	GO:0016810//hydrolase activity, acting on carbon-nitrogen (but not peptide) bonds;GO:0003824//catalytic activity;GO:0016787//hydrolase activity	GO:0006629//lipid metabolic process;GO:0006643//membrane lipid metabolic process;GO:0071704//organic substance metabolic process;GO:0044763//single-organism cellular process;GO:0044255//cellular lipid metabolic process;GO:0008152//metabolic process;GO:0044710//single-organism metabolic process;GO:0044237//cellular metabolic process;GO:1901564//organonitrogen compound metabolic process;GO:0009987/…
Gene016682	CIL1256S0019	Isoform037457	CIL1256S0019	new	Acot8	acyl-coenzyme A thioesterase 8; K01068 acyl-coenzyme A thioesterase 1/2/4 [EC:3.1.2.2]	Metabolism	Global and Overview;Lipid metabolism	ko01100//Metabolic pathways;ko01110//Biosynthesis of secondary metabolites;ko01040//Biosynthesis of unsaturated fatty acids;ko00062//Fatty acid elongation	K01068	-	GO:0016289//CoA hydrolase activity;GO:0016788//hydrolase activity, acting on ester bonds;GO:0003824//catalytic activity;GO:0047617//acyl-CoA hydrolase activity;GO:0016787//hydrolase activity;GO:0016790//thiolester hydrolase activity	-
Gene004663	CIL1588S0027	Isoform010296	CIL1588S0027	known	ACX1	PREDICTED: peroxisomal acyl-coenzyme A oxidase 1-like [Juglans regia]	Metabolism;Cellular Processes	Transport and catabolism;Lipid metabolism;Global and Overview	ko01100//Metabolic pathways;ko01110//Biosynthesis of secondary metabolites;ko01212//Fatty acid metabolism;ko04146//Peroxisome;ko00071//Fatty acid degradation;ko00592//alpha-Linolenic acid metabolism;ko01040//Biosynthesis of unsaturated fatty acids	K00232	GO:0005737//cytoplasm;GO:0043229//intracellular organelle;GO:0043226//organelle;GO:0005623//cell;GO:0044464//cell part;GO:0043227//membrane-bounded organelle;GO:0042579//microbody;GO:0044424//intracellular part;GO:0044444//cytoplasmic part;GO:0005622//intracellular;GO:0043231//intracellular membrane-bounded organelle	GO:0097159//organic cyclic compound binding;GO:1901363//heterocyclic compound binding;GO:0016634//oxidoreductase activity, acting on the CH-CH group of donors, oxygen as acceptor;GO:0000166//nucleotide binding;GO:0005488//binding;GO:0036094//small molecule binding;GO:0016627//oxidoreductase activity, acting on the CH-CH group of donors;GO:0003824//catalytic activity;GO:1901265//nucleoside phospha…	GO:0009056//catabolic process;GO:0071704//organic substance metabolic process;GO:0044255//cellular lipid metabolic process;GO:0016054//organic acid catabolic process;GO:0044238//primary metabolic process;GO:0006629//lipid metabolic process;GO:0044699//single-organism process;GO:0043436//oxoacid metabolic process;GO:0006631//fatty acid metabolic process;GO:1901575//organic substance catabolic proc…
Gene007099	CIL0902S0189	Isoform015545	CIL0902S0189	new	ACX1	peroxisomal acyl-coenzyme A oxidase 1-like; K00232 acyl-CoA oxidase [EC:1.3.3.6]	Metabolism;Cellular Processes	Transport and catabolism;Lipid metabolism;Global and Overview	ko01100//Metabolic pathways;ko01110//Biosynthesis of secondary metabolites;ko01212//Fatty acid metabolism;ko04146//Peroxisome;ko00071//Fatty acid degradation;ko00592//alpha-Linolenic acid metabolism;ko01040//Biosynthesis of unsaturated fatty acids	K00232	GO:0044444//cytoplasmic part;GO:0043229//intracellular organelle;GO:0043226//organelle;GO:0043227//membrane-bounded organelle;GO:0005623//cell;GO:0005737//cytoplasm;GO:0042579//microbody;GO:0005622//intracellular;GO:0043231//intracellular membrane-bounded organelle;GO:0044424//intracellular part;GO:0044464//cell part	GO:0003824//catalytic activity;GO:0036094//small molecule binding;GO:0097159//organic cyclic compound binding;GO:0016491//oxidoreductase activity;GO:1901363//heterocyclic compound binding;GO:0016634//oxidoreductase activity, acting on the CH-CH group of donors, oxygen as acceptor;GO:0016627//oxidoreductase activity, acting on the CH-CH group of donors;GO:0005488//binding;GO:0000166//nucleotide bi…	GO:0043436//oxoacid metabolic process;GO:0044712//single-organism catabolic process;GO:0016042//lipid catabolic process;GO:1901575//organic substance catabolic process;GO:0009056//catabolic process;GO:0044238//primary metabolic process;GO:0009987//cellular process;GO:0044282//small molecule catabolic process;GO:0006629//lipid metabolic process;GO:0071704//organic substance metabolic process;GO:00…
Gene007099	CIL0902S0189	Isoform015546	CIL0902S0189	new	ACX1	peroxisomal acyl-coenzyme A oxidase 1-like; K00232 acyl-CoA oxidase [EC:1.3.3.6]	Metabolism;Cellular Processes	Lipid metabolism;Transport and catabolism;Global and Overview	ko01100//Metabolic pathways;ko01110//Biosynthesis of secondary metabolites;ko01212//Fatty acid metabolism;ko04146//Peroxisome;ko00071//Fatty acid degradation;ko00592//alpha-Linolenic acid metabolism;ko01040//Biosynthesis of unsaturated fatty acids	K00232	GO:0005622//intracellular;GO:0043227//membrane-bounded organelle;GO:0042579//microbody;GO:0043231//intracellular membrane-bounded organelle;GO:0043226//organelle;GO:0005737//cytoplasm;GO:0005623//cell;GO:0044464//cell part;GO:0044424//intracellular part;GO:0044444//cytoplasmic part;GO:0043229//intracellular organelle	GO:1901363//heterocyclic compound binding;GO:0005488//binding;GO:0016627//oxidoreductase activity, acting on the CH-CH group of donors;GO:0003824//catalytic activity;GO:1901265//nucleoside phosphate binding;GO:0036094//small molecule binding;GO:0016491//oxidoreductase activity;GO:0097159//organic cyclic compound binding;GO:0016634//oxidoreductase activity, acting on the CH-CH group of donors, oxy…	GO:0006629//lipid metabolic process;GO:0006082//organic acid metabolic process;GO:0032787//monocarboxylic acid metabolic process;GO:0044282//small molecule catabolic process;GO:1901575//organic substance catabolic process;GO:0009987//cellular process;GO:0009062//fatty acid catabolic process;GO:0019752//carboxylic acid metabolic process;GO:0046395//carboxylic acid catabolic process;GO:0006631//fat…
Gene007099	CIL0902S0189	Isoform015548	CIL0902S0189	new	ACX1	peroxisomal acyl-coenzyme A oxidase 1-like; K00232 acyl-CoA oxidase [EC:1.3.3.6]	Cellular Processes;Metabolism	Lipid metabolism;Transport and catabolism;Global and Overview	ko01100//Metabolic pathways;ko01110//Biosynthesis of secondary metabolites;ko01212//Fatty acid metabolism;ko04146//Peroxisome;ko00071//Fatty acid degradation;ko00592//alpha-Linolenic acid metabolism;ko01040//Biosynthesis of unsaturated fatty acids	K00232	GO:0042579//microbody;GO:0044444//cytoplasmic part;GO:0043231//intracellular membrane-bounded organelle;GO:0043226//organelle;GO:0044424//intracellular part;GO:0005737//cytoplasm;GO:0005622//intracellular;GO:0043227//membrane-bounded organelle;GO:0005623//cell;GO:0044464//cell part;GO:0043229//intracellular organelle	GO:1901363//heterocyclic compound binding;GO:0097159//organic cyclic compound binding;GO:0016634//oxidoreductase activity, acting on the CH-CH group of donors, oxygen as acceptor;GO:0005488//binding;GO:0016627//oxidoreductase activity, acting on the CH-CH group of donors;GO:0016491//oxidoreductase activity;GO:1901265//nucleoside phosphate binding;GO:0003824//catalytic activity;GO:0036094//small m…	GO:0016054//organic acid catabolic process;GO:0071704//organic substance metabolic process;GO:0046395//carboxylic acid catabolic process;GO:0044710//single-organism metabolic process;GO:0044248//cellular catabolic process;GO:0044282//small molecule catabolic process;GO:0009056//catabolic process;GO:0032787//monocarboxylic acid metabolic process;GO:0072329//monocarboxylic acid catabolic process;GO…
Gene001774	CIL1359S0006	Isoform003885	CIL1359S0006	known	ACX2	PREDICTED: acyl-coenzyme A oxidase 2, peroxisomal [Juglans regia]	Cellular Processes;Metabolism	Global and Overview;Transport and catabolism;Lipid metabolism	ko01100//Metabolic pathways;ko01110//Biosynthesis of secondary metabolites;ko01212//Fatty acid metabolism;ko04146//Peroxisome;ko00071//Fatty acid degradation;ko00592//alpha-Linolenic acid metabolism;ko01040//Biosynthesis of unsaturated fatty acids	K00232	GO:0043226//organelle;GO:0043229//intracellular organelle;GO:0044464//cell part;GO:0005622//intracellular;GO:0043231//intracellular membrane-bounded organelle;GO:0044444//cytoplasmic part;GO:0005623//cell;GO:0044424//intracellular part;GO:0005737//cytoplasm;GO:0042579//microbody;GO:0043227//membrane-bounded organelle	GO:0005488//binding;GO:0003824//catalytic activity;GO:0036094//small molecule binding;GO:0016634//oxidoreductase activity, acting on the CH-CH group of donors, oxygen as acceptor;GO:1901363//heterocyclic compound binding;GO:0016491//oxidoreductase activity;GO:0016627//oxidoreductase activity, acting on the CH-CH group of donors;GO:1901265//nucleoside phosphate binding;GO:0000166//nucleotide bindi…	GO:0044257//cellular protein catabolic process;GO:0043632//modification-dependent macromolecule catabolic process;GO:0010033//response to organic substance;GO:0006631//fatty acid metabolic process;GO:0035966//response to topologically incorrect protein;GO:0040007//growth;GO:0043436//oxoacid metabolic process;GO:0009719//response to endogenous stimulus;GO:0071840//cellular component organization o…
Gene016309	CIL1236S0034	Isoform036619	CIL1236S0034	new	ACX3	acyl-coenzyme A oxidase 3, peroxisomal; K00232 acyl-CoA oxidase [EC:1.3.3.6]	Metabolism;Cellular Processes	Global and Overview;Transport and catabolism;Lipid metabolism	ko01100//Metabolic pathways;ko01110//Biosynthesis of secondary metabolites;ko01212//Fatty acid metabolism;ko04146//Peroxisome;ko00071//Fatty acid degradation;ko00592//alpha-Linolenic acid metabolism;ko01040//Biosynthesis of unsaturated fatty acids	K00232	GO:0005622//intracellular;GO:0005737//cytoplasm;GO:0044424//intracellular part;GO:0044444//cytoplasmic part;GO:0043229//intracellular organelle;GO:0044464//cell part;GO:0043226//organelle;GO:0043227//membrane-bounded organelle;GO:0005623//cell;GO:0043231//intracellular membrane-bounded organelle;GO:0042579//microbody	GO:0000166//nucleotide binding;GO:0036094//small molecule binding;GO:1901265//nucleoside phosphate binding;GO:0097159//organic cyclic compound binding;GO:1901363//heterocyclic compound binding;GO:0016634//oxidoreductase activity, acting on the CH-CH group of donors, oxygen as acceptor;GO:0005488//binding;GO:0016491//oxidoreductase activity;GO:0003824//catalytic activity;GO:0016627//oxidoreductase…	GO:0044237//cellular metabolic process;GO:0044710//single-organism metabolic process;GO:0046395//carboxylic acid catabolic process;GO:0009056//catabolic process;GO:0044763//single-organism cellular process;GO:0044282//small molecule catabolic process;GO:0072329//monocarboxylic acid catabolic process;GO:0071704//organic substance metabolic process;GO:0019752//carboxylic acid metabolic process;GO:0…
Gene016309	CIL1236S0034	Isoform036620	CIL1236S0034	new	ACX3	acyl-coenzyme A oxidase 3, peroxisomal-like; K00232 acyl-CoA oxidase [EC:1.3.3.6]	Metabolism;Cellular Processes	Global and Overview;Lipid metabolism;Transport and catabolism	ko01100//Metabolic pathways;ko01110//Biosynthesis of secondary metabolites;ko01212//Fatty acid metabolism;ko04146//Peroxisome;ko00071//Fatty acid degradation;ko00592//alpha-Linolenic acid metabolism;ko01040//Biosynthesis of unsaturated fatty acids	K00232	GO:0005622//intracellular;GO:0005623//cell;GO:0044444//cytoplasmic part;GO:0043226//organelle;GO:0043229//intracellular organelle;GO:0043231//intracellular membrane-bounded organelle;GO:0044424//intracellular part;GO:0043227//membrane-bounded organelle;GO:0044464//cell part;GO:0005737//cytoplasm;GO:0042579//microbody	GO:0003824//catalytic activity;GO:0000166//nucleotide binding;GO:0097159//organic cyclic compound binding;GO:1901265//nucleoside phosphate binding;GO:0005488//binding;GO:1901363//heterocyclic compound binding;GO:0016491//oxidoreductase activity;GO:0016634//oxidoreductase activity, acting on the CH-CH group of donors, oxygen as acceptor;GO:0036094//small molecule binding;GO:0016627//oxidoreductase…	GO:0044281//small molecule metabolic process;GO:0044238//primary metabolic process;GO:0009056//catabolic process;GO:0006629//lipid metabolic process;GO:0044763//single-organism cellular process;GO:0044712//single-organism catabolic process;GO:0009987//cellular process;GO:0009062//fatty acid catabolic process;GO:0006082//organic acid metabolic process;GO:0044282//small molecule catabolic process;G…
Gene010649	CIL1018S0043	Isoform023663	CIL1018S0043	new	ACX4	acyl-coenzyme A oxidase 4, peroxisomal; K00232 acyl-CoA oxidase [EC:1.3.3.6]	Metabolism;Cellular Processes	Global and Overview;Lipid metabolism;Transport and catabolism	ko01100//Metabolic pathways;ko01110//Biosynthesis of secondary metabolites;ko01212//Fatty acid metabolism;ko04146//Peroxisome;ko00071//Fatty acid degradation;ko00592//alpha-Linolenic acid metabolism;ko01040//Biosynthesis of unsaturated fatty acids	K00232	GO:0005623//cell;GO:0044444//cytoplasmic part;GO:0005737//cytoplasm;GO:0043227//membrane-bounded organelle;GO:0044464//cell part;GO:0005777//peroxisome;GO:0043231//intracellular membrane-bounded organelle;GO:0043226//organelle;GO:0044424//intracellular part;GO:0005622//intracellular;GO:0043229//intracellular organelle;GO:0042579//microbody	GO:0016491//oxidoreductase activity;GO:0005488//binding;GO:0097159//organic cyclic compound binding;GO:0016634//oxidoreductase activity, acting on the CH-CH group of donors, oxygen as acceptor;GO:1901265//nucleoside phosphate binding;GO:0000166//nucleotide binding;GO:1901363//heterocyclic compound binding;GO:0036094//small molecule binding;GO:0016627//oxidoreductase activity, acting on the CH-CH …	GO:0007031//peroxisome organization;GO:0006631//fatty acid metabolic process;GO:1902589//single-organism organelle organization;GO:1902580//single-organism cellular localization;GO:0071840//cellular component organization or biogenesis;GO:0044765//single-organism transport;GO:0009987//cellular process;GO:0006810//transport;GO:0044763//single-organism cellular process;GO:0000003//reproduction;GO:0…
Gene010649	CIL1018S0043	Isoform023664	CIL1018S0043	new	ACX4	acyl-coenzyme A oxidase 4, peroxisomal; K00232 acyl-CoA oxidase [EC:1.3.3.6]	Metabolism;Cellular Processes	Lipid metabolism;Transport and catabolism;Global and Overview	ko01100//Metabolic pathways;ko01110//Biosynthesis of secondary metabolites;ko01212//Fatty acid metabolism;ko04146//Peroxisome;ko00071//Fatty acid degradation;ko00592//alpha-Linolenic acid metabolism;ko01040//Biosynthesis of unsaturated fatty acids	K00232	GO:0044424//intracellular part;GO:0044464//cell part;GO:0005622//intracellular;GO:0005623//cell;GO:0043229//intracellular organelle;GO:0044444//cytoplasmic part;GO:0043231//intracellular membrane-bounded organelle;GO:0043226//organelle;GO:0005777//peroxisome;GO:0042579//microbody;GO:0005737//cytoplasm;GO:0043227//membrane-bounded organelle	GO:0016491//oxidoreductase activity;GO:0005488//binding;GO:0016634//oxidoreductase activity, acting on the CH-CH group of donors, oxygen as acceptor;GO:1901265//nucleoside phosphate binding;GO:0036094//small molecule binding;GO:0016627//oxidoreductase activity, acting on the CH-CH group of donors;GO:0003824//catalytic activity;GO:0000166//nucleotide binding;GO:0097159//organic cyclic compound bin…	GO:0016482//cytoplasmic transport;GO:0043436//oxoacid metabolic process;GO:0044699//single-organism process;GO:0051179//localization;GO:0034613//cellular protein localization;GO:0006625//protein targeting to peroxisome;GO:0044763//single-organism cellular process;GO:0051649//establishment of localization in cell;GO:0006629//lipid metabolic process;GO:0051641//cellular localization;GO:0006605//pro…
Gene010649	CIL1018S0043	Isoform023665	CIL1018S0043	new	ACX4	acyl-coenzyme A oxidase 4, peroxisomal; K00232 acyl-CoA oxidase [EC:1.3.3.6]	Cellular Processes;Metabolism	Global and Overview;Transport and catabolism;Lipid metabolism	ko01100//Metabolic pathways;ko01110//Biosynthesis of secondary metabolites;ko01212//Fatty acid metabolism;ko04146//Peroxisome;ko00071//Fatty acid degradation;ko00592//alpha-Linolenic acid metabolism;ko01040//Biosynthesis of unsaturated fatty acids	K00232	GO:0005622//intracellular;GO:0005777//peroxisome;GO:0005623//cell;GO:0044424//intracellular part;GO:0043226//organelle;GO:0043227//membrane-bounded organelle;GO:0005737//cytoplasm;GO:0044444//cytoplasmic part;GO:0043231//intracellular membrane-bounded organelle;GO:0044464//cell part;GO:0042579//microbody;GO:0043229//intracellular organelle	GO:0000166//nucleotide binding;GO:0016627//oxidoreductase activity, acting on the CH-CH group of donors;GO:0036094//small molecule binding;GO:0005488//binding;GO:0016491//oxidoreductase activity;GO:0003824//catalytic activity;GO:1901265//nucleoside phosphate binding;GO:1901363//heterocyclic compound binding;GO:0097159//organic cyclic compound binding;GO:0016634//oxidoreductase activity, acting on…	GO:0051234//establishment of localization;GO:0044237//cellular metabolic process;GO:0044712//single-organism catabolic process;GO:0016042//lipid catabolic process;GO:1902589//single-organism organelle organization;GO:0072594//establishment of protein localization to organelle;GO:0015031//protein transport;GO:1902578//single-organism localization;GO:0044255//cellular lipid metabolic process;GO:001…
Gene010649	CIL1018S0043	Isoform023667	CIL1018S0043	new	ACX4	acyl-coenzyme A oxidase 4, peroxisomal; K00232 acyl-CoA oxidase [EC:1.3.3.6]	Cellular Processes;Metabolism	Transport and catabolism;Lipid metabolism;Global and Overview	ko01100//Metabolic pathways;ko01110//Biosynthesis of secondary metabolites;ko01212//Fatty acid metabolism;ko04146//Peroxisome;ko00071//Fatty acid degradation;ko00592//alpha-Linolenic acid metabolism;ko01040//Biosynthesis of unsaturated fatty acids	K00232	GO:0005623//cell;GO:0043227//membrane-bounded organelle;GO:0005777//peroxisome;GO:0044424//intracellular part;GO:0043229//intracellular organelle;GO:0043226//organelle;GO:0005737//cytoplasm;GO:0042579//microbody;GO:0005622//intracellular;GO:0044444//cytoplasmic part;GO:0043231//intracellular membrane-bounded organelle;GO:0044464//cell part	GO:0016627//oxidoreductase activity, acting on the CH-CH group of donors;GO:0097159//organic cyclic compound binding;GO:0016491//oxidoreductase activity;GO:0036094//small molecule binding;GO:1901265//nucleoside phosphate binding;GO:0005488//binding;GO:1901363//heterocyclic compound binding;GO:0000166//nucleotide binding;GO:0003824//catalytic activity;GO:0016634//oxidoreductase activity, acting on…	GO:0043436//oxoacid metabolic process;GO:0006605//protein targeting;GO:0006629//lipid metabolic process;GO:0043170//macromolecule metabolic process;GO:0006631//fatty acid metabolic process;GO:0051234//establishment of localization;GO:0016042//lipid catabolic process;GO:0044237//cellular metabolic process;GO:0071702//organic substance transport;GO:0033036//macromolecule localization;GO:0015031//pr…
Gene010649	CIL1018S0043	Isoform023668	CIL1018S0043	new	ACX4	acyl-coenzyme A oxidase 4, peroxisomal; K00232 acyl-CoA oxidase [EC:1.3.3.6]	Cellular Processes;Metabolism	Transport and catabolism;Lipid metabolism;Global and Overview	ko01100//Metabolic pathways;ko01110//Biosynthesis of secondary metabolites;ko01212//Fatty acid metabolism;ko04146//Peroxisome;ko00071//Fatty acid degradation;ko00592//alpha-Linolenic acid metabolism;ko01040//Biosynthesis of unsaturated fatty acids	K00232	GO:0043227//membrane-bounded organelle;GO:0044464//cell part;GO:0005737//cytoplasm;GO:0005777//peroxisome;GO:0042579//microbody;GO:0005623//cell;GO:0044424//intracellular part;GO:0043229//intracellular organelle;GO:0005622//intracellular;GO:0043226//organelle;GO:0044444//cytoplasmic part;GO:0043231//intracellular membrane-bounded organelle	GO:0000166//nucleotide binding;GO:0016627//oxidoreductase activity, acting on the CH-CH group of donors;GO:0097159//organic cyclic compound binding;GO:0016634//oxidoreductase activity, acting on the CH-CH group of donors, oxygen as acceptor;GO:1901363//heterocyclic compound binding;GO:0003824//catalytic activity;GO:0005488//binding;GO:0016491//oxidoreductase activity;GO:1901265//nucleoside phosph…	GO:0044238//primary metabolic process;GO:0070727//cellular macromolecule localization;GO:0034613//cellular protein localization;GO:0000003//reproduction;GO:0007031//peroxisome organization;GO:0009057//macromolecule catabolic process;GO:0071702//organic substance transport;GO:0006886//intracellular protein transport;GO:0051179//localization;GO:0044281//small molecule metabolic process;GO:0003006//…
Gene010649	CIL1018S0043	Isoform023669	CIL1018S0043	new	ACX4	acyl-coenzyme A oxidase 4, peroxisomal; K00232 acyl-CoA oxidase [EC:1.3.3.6]	Metabolism;Cellular Processes	Global and Overview;Transport and catabolism;Lipid metabolism	ko01100//Metabolic pathways;ko01110//Biosynthesis of secondary metabolites;ko01212//Fatty acid metabolism;ko04146//Peroxisome;ko00071//Fatty acid degradation;ko00592//alpha-Linolenic acid metabolism;ko01040//Biosynthesis of unsaturated fatty acids	K00232	GO:0005622//intracellular;GO:0043229//intracellular organelle;GO:0043226//organelle;GO:0044444//cytoplasmic part;GO:0043231//intracellular membrane-bounded organelle;GO:0042579//microbody;GO:0044464//cell part;GO:0005737//cytoplasm;GO:0005777//peroxisome;GO:0043227//membrane-bounded organelle;GO:0005623//cell;GO:0044424//intracellular part	GO:0003824//catalytic activity;GO:1901363//heterocyclic compound binding;GO:0000166//nucleotide binding;GO:0016627//oxidoreductase activity, acting on the CH-CH group of donors;GO:0016634//oxidoreductase activity, acting on the CH-CH group of donors, oxygen as acceptor;GO:0097159//organic cyclic compound binding;GO:0016491//oxidoreductase activity;GO:1901265//nucleoside phosphate binding;GO:00054…	GO:0044281//small molecule metabolic process;GO:0016054//organic acid catabolic process;GO:0022414//reproductive process;GO:0008104//protein localization;GO:0051649//establishment of localization in cell;GO:0043574//peroxisomal transport;GO:0072329//monocarboxylic acid catabolic process;GO:0071704//organic substance metabolic process;GO:0006082//organic acid metabolic process;GO:0072663//establis…
Gene010649	CIL1018S0043	Isoform023670	CIL1018S0043	new	ACX4	acyl-coenzyme A oxidase 4, peroxisomal; K00232 acyl-CoA oxidase [EC:1.3.3.6]	Metabolism;Cellular Processes	Global and Overview;Lipid metabolism;Transport and catabolism	ko01100//Metabolic pathways;ko01110//Biosynthesis of secondary metabolites;ko01212//Fatty acid metabolism;ko04146//Peroxisome;ko00071//Fatty acid degradation;ko00592//alpha-Linolenic acid metabolism;ko01040//Biosynthesis of unsaturated fatty acids	K00232	GO:0005777//peroxisome;GO:0043226//organelle;GO:0042579//microbody;GO:0043231//intracellular membrane-bounded organelle;GO:0005622//intracellular;GO:0044424//intracellular part;GO:0044444//cytoplasmic part;GO:0044464//cell part;GO:0005623//cell;GO:0043229//intracellular organelle;GO:0043227//membrane-bounded organelle;GO:0005737//cytoplasm	GO:0005488//binding;GO:0003824//catalytic activity;GO:1901265//nucleoside phosphate binding;GO:1901363//heterocyclic compound binding;GO:0016491//oxidoreductase activity;GO:0016634//oxidoreductase activity, acting on the CH-CH group of donors, oxygen as acceptor;GO:0097159//organic cyclic compound binding;GO:0000166//nucleotide binding;GO:0016627//oxidoreductase activity, acting on the CH-CH grou…	GO:0072662//protein localization to peroxisome;GO:1901575//organic substance catabolic process;GO:0044242//cellular lipid catabolic process;GO:0032787//monocarboxylic acid metabolic process;GO:0072594//establishment of protein localization to organelle;GO:0033036//macromolecule localization;GO:0016054//organic acid catabolic process;GO:0072663//establishment of protein localization to peroxisome;…
Gene010649	CIL1018S0043	Isoform023671	CIL1018S0043	new	ACX4	ACX4; acyl-coenzyme A oxidase 4; K00232 acyl-CoA oxidase [EC:1.3.3.6]	Metabolism;Cellular Processes	Global and Overview;Transport and catabolism;Lipid metabolism	ko01100//Metabolic pathways;ko01110//Biosynthesis of secondary metabolites;ko01212//Fatty acid metabolism;ko04146//Peroxisome;ko00071//Fatty acid degradation;ko00592//alpha-Linolenic acid metabolism;ko01040//Biosynthesis of unsaturated fatty acids	K00232	GO:0005623//cell;GO:0005777//peroxisome;GO:0044444//cytoplasmic part;GO:0043229//intracellular organelle;GO:0005737//cytoplasm;GO:0043226//organelle;GO:0044424//intracellular part;GO:0043231//intracellular membrane-bounded organelle;GO:0005622//intracellular;GO:0042579//microbody;GO:0043227//membrane-bounded organelle;GO:0044464//cell part	GO:0016627//oxidoreductase activity, acting on the CH-CH group of donors;GO:0003824//catalytic activity;GO:0016634//oxidoreductase activity, acting on the CH-CH group of donors, oxygen as acceptor;GO:0005488//binding;GO:0036094//small molecule binding;GO:1901363//heterocyclic compound binding;GO:0000166//nucleotide binding;GO:0016491//oxidoreductase activity;GO:0097159//organic cyclic compound bi…	GO:0072662//protein localization to peroxisome;GO:0006631//fatty acid metabolic process;GO:0051234//establishment of localization;GO:0008104//protein localization;GO:0006886//intracellular protein transport;GO:1902580//single-organism cellular localization;GO:0044248//cellular catabolic process;GO:0007031//peroxisome organization;GO:0009062//fatty acid catabolic process;GO:0000003//reproduction;G…
Gene010649	CIL1018S0043	Isoform023672	CIL1018S0043	new	ACX4	acyl-coenzyme A oxidase 4, peroxisomal; K00232 acyl-CoA oxidase [EC:1.3.3.6]	Metabolism;Cellular Processes	Global and Overview;Lipid metabolism;Transport and catabolism	ko01100//Metabolic pathways;ko01110//Biosynthesis of secondary metabolites;ko01212//Fatty acid metabolism;ko04146//Peroxisome;ko00071//Fatty acid degradation;ko00592//alpha-Linolenic acid metabolism;ko01040//Biosynthesis of unsaturated fatty acids	K00232	GO:0005777//peroxisome;GO:0043229//intracellular organelle;GO:0043231//intracellular membrane-bounded organelle;GO:0044424//intracellular part;GO:0042579//microbody;GO:0044464//cell part;GO:0044444//cytoplasmic part;GO:0005622//intracellular;GO:0043226//organelle;GO:0043227//membrane-bounded organelle;GO:0005623//cell;GO:0005737//cytoplasm	GO:0016634//oxidoreductase activity, acting on the CH-CH group of donors, oxygen as acceptor;GO:0097159//organic cyclic compound binding;GO:0016491//oxidoreductase activity;GO:1901363//heterocyclic compound binding;GO:0000166//nucleotide binding;GO:0036094//small molecule binding;GO:1901265//nucleoside phosphate binding;GO:0003824//catalytic activity;GO:0016627//oxidoreductase activity, acting on…	GO:0044765//single-organism transport;GO:0016043//cellular component organization;GO:0072663//establishment of protein localization to peroxisome;GO:0009056//catabolic process;GO:0044237//cellular metabolic process;GO:0044710//single-organism metabolic process;GO:1901575//organic substance catabolic process;GO:0003006//developmental process involved in reproduction;GO:0051234//establishment of lo…
Gene002173	CIL1386S0032	Isoform004801	CIL1386S0032	new	ADH	alcohol dehydrogenase class-P; K18857 alcohol dehydrogenase class-P [EC:1.1.1.1]	Metabolism	Lipid metabolism;Amino acid metabolism;Carbohydrate metabolism;Global and Overview	ko01100//Metabolic pathways;ko01110//Biosynthesis of secondary metabolites;ko01130//Biosynthesis of antibiotics;ko01120//Microbial metabolism in diverse environments;ko00010//Glycolysis / Gluconeogenesis;ko00071//Fatty acid degradation;ko00350//Tyrosine metabolism;ko01220//Degradation of aromatic compounds	K00001	-	GO:0043169//cation binding;GO:0003824//catalytic activity;GO:0043167//ion binding;GO:0005488//binding;GO:0016491//oxidoreductase activity;GO:0016614//oxidoreductase activity, acting on CH-OH group of donors;GO:0016616//oxidoreductase activity, acting on the CH-OH group of donors, NAD or NADP as acceptor	GO:0044699//single-organism process;GO:0008152//metabolic process;GO:0044710//single-organism metabolic process
Gene002173	CIL1386S0032	Isoform004802	CIL1386S0032	new	ADH	alcohol dehydrogenase class-P; K18857 alcohol dehydrogenase class-P [EC:1.1.1.1]	Metabolism	Carbohydrate metabolism;Amino acid metabolism;Lipid metabolism;Global and Overview	ko01100//Metabolic pathways;ko01110//Biosynthesis of secondary metabolites;ko01120//Microbial metabolism in diverse environments;ko00010//Glycolysis / Gluconeogenesis;ko00071//Fatty acid degradation;ko00350//Tyrosine metabolism;ko00592//alpha-Linolenic acid metabolism	K18857	-	GO:0016616//oxidoreductase activity, acting on the CH-OH group of donors, NAD or NADP as acceptor;GO:0043169//cation binding;GO:0005488//binding;GO:0003824//catalytic activity;GO:0043167//ion binding;GO:0016614//oxidoreductase activity, acting on CH-OH group of donors;GO:0016491//oxidoreductase activity	GO:0044710//single-organism metabolic process;GO:0044699//single-organism process;GO:0008152//metabolic process
Gene002173	CIL1386S0032	Isoform004803	CIL1386S0032	new	ADH	alcohol dehydrogenase class-P; K18857 alcohol dehydrogenase class-P [EC:1.1.1.1]	Metabolism	Global and Overview;Carbohydrate metabolism;Lipid metabolism;Amino acid metabolism	ko01100//Metabolic pathways;ko01110//Biosynthesis of secondary metabolites;ko01120//Microbial metabolism in diverse environments;ko00010//Glycolysis / Gluconeogenesis;ko00071//Fatty acid degradation;ko00350//Tyrosine metabolism;ko00592//alpha-Linolenic acid metabolism	K18857	-	GO:0016616//oxidoreductase activity, acting on the CH-OH group of donors, NAD or NADP as acceptor;GO:0005488//binding;GO:0016491//oxidoreductase activity;GO:0003824//catalytic activity;GO:0016614//oxidoreductase activity, acting on CH-OH group of donors;GO:0043167//ion binding;GO:0043169//cation binding	GO:0008152//metabolic process;GO:0044710//single-organism metabolic process;GO:0044699//single-organism process
Gene002175	CIL1386S0037	Isoform004811	CIL1386S0037	new	ADH	POPTRDRAFT_718546; alcohol-dehydrogenase family protein; K18857 alcohol dehydrogenase class-P [EC:1.1.1.1]	Metabolism	Global and Overview;Carbohydrate metabolism;Amino acid metabolism;Lipid metabolism	ko01100//Metabolic pathways;ko01110//Biosynthesis of secondary metabolites;ko01120//Microbial metabolism in diverse environments;ko00010//Glycolysis / Gluconeogenesis;ko00071//Fatty acid degradation;ko00350//Tyrosine metabolism;ko00592//alpha-Linolenic acid metabolism	K18857	-	GO:0016491//oxidoreductase activity;GO:0016616//oxidoreductase activity, acting on the CH-OH group of donors, NAD or NADP as acceptor;GO:0003824//catalytic activity;GO:0005488//binding;GO:0043169//cation binding;GO:0016614//oxidoreductase activity, acting on CH-OH group of donors;GO:0043167//ion binding	GO:0044699//single-organism process;GO:0044710//single-organism metabolic process;GO:0008152//metabolic process
Gene002175	CIL1386S0037	Isoform004813	CIL1386S0037	new	ADH	POPTRDRAFT_718546; alcohol-dehydrogenase family protein; K18857 alcohol dehydrogenase class-P [EC:1.1.1.1]	Metabolism	Global and Overview;Carbohydrate metabolism;Lipid metabolism;Amino acid metabolism	ko01100//Metabolic pathways;ko01110//Biosynthesis of secondary metabolites;ko01120//Microbial metabolism in diverse environments;ko00010//Glycolysis / Gluconeogenesis;ko00071//Fatty acid degradation;ko00350//Tyrosine metabolism;ko00592//alpha-Linolenic acid metabolism	K18857	-	GO:0043169//cation binding;GO:0043167//ion binding;GO:0016491//oxidoreductase activity;GO:0016616//oxidoreductase activity, acting on the CH-OH group of donors, NAD or NADP as acceptor;GO:0016614//oxidoreductase activity, acting on CH-OH group of donors;GO:0003824//catalytic activity;GO:0005488//binding	GO:0008152//metabolic process;GO:0044710//single-organism metabolic process;GO:0044699//single-organism process
Gene002175	CIL1386S0037	Isoform004814	CIL1386S0037	new	ADH	alcohol dehydrogenase 1-like; K18857 alcohol dehydrogenase class-P [EC:1.1.1.1]	Metabolism	Lipid metabolism;Amino acid metabolism;Carbohydrate metabolism;Global and Overview	ko01100//Metabolic pathways;ko01110//Biosynthesis of secondary metabolites;ko01120//Microbial metabolism in diverse environments;ko00010//Glycolysis / Gluconeogenesis;ko00071//Fatty acid degradation;ko00350//Tyrosine metabolism;ko00592//alpha-Linolenic acid metabolism	K18857	-	GO:0003824//catalytic activity;GO:0043169//cation binding;GO:0043167//ion binding;GO:0005488//binding	GO:0044699//single-organism process;GO:0044710//single-organism metabolic process;GO:0008152//metabolic process
Gene002175	CIL1386S0037	Isoform004815	CIL1386S0037	new	ADH	POPTRDRAFT_718546; alcohol-dehydrogenase family protein; K18857 alcohol dehydrogenase class-P [EC:1.1.1.1]	Metabolism	Global and Overview;Amino acid metabolism;Lipid metabolism;Carbohydrate metabolism	ko01100//Metabolic pathways;ko01110//Biosynthesis of secondary metabolites;ko01120//Microbial metabolism in diverse environments;ko00010//Glycolysis / Gluconeogenesis;ko00071//Fatty acid degradation;ko00350//Tyrosine metabolism;ko00592//alpha-Linolenic acid metabolism	K18857	-	GO:0043167//ion binding;GO:0016616//oxidoreductase activity, acting on the CH-OH group of donors, NAD or NADP as acceptor;GO:0043169//cation binding;GO:0016614//oxidoreductase activity, acting on CH-OH group of donors;GO:0003824//catalytic activity;GO:0016491//oxidoreductase activity;GO:0005488//binding	GO:0044699//single-organism process;GO:0044710//single-organism metabolic process;GO:0008152//metabolic process
Gene002173	CIL1386S0032	Isoform004800	CIL1386S0032	new	ADH1	alcohol dehydrogenase class-P; K18857 alcohol dehydrogenase class-P [EC:1.1.1.1]	Metabolism	Carbohydrate metabolism;Lipid metabolism;Amino acid metabolism;Global and Overview	ko01100//Metabolic pathways;ko01110//Biosynthesis of secondary metabolites;ko01120//Microbial metabolism in diverse environments;ko00010//Glycolysis / Gluconeogenesis;ko00071//Fatty acid degradation;ko00350//Tyrosine metabolism;ko00592//alpha-Linolenic acid metabolism	K18857	-	GO:0016491//oxidoreductase activity;GO:0043167//ion binding;GO:0046914//transition metal ion binding;GO:0016616//oxidoreductase activity, acting on the CH-OH group of donors, NAD or NADP as acceptor;GO:0003824//catalytic activity;GO:0046872//metal ion binding;GO:0005488//binding;GO:0016614//oxidoreductase activity, acting on CH-OH group of donors;GO:0043169//cation binding	GO:0044710//single-organism metabolic process;GO:0008152//metabolic process;GO:0044699//single-organism process
Gene002173	CIL1386S0032	Isoform004804	CIL1386S0032	new	ADH1	alcohol dehydrogenase class-P; K18857 alcohol dehydrogenase class-P [EC:1.1.1.1]	Metabolism	Amino acid metabolism;Lipid metabolism;Carbohydrate metabolism;Global and Overview	ko01100//Metabolic pathways;ko01110//Biosynthesis of secondary metabolites;ko01120//Microbial metabolism in diverse environments;ko00010//Glycolysis / Gluconeogenesis;ko00071//Fatty acid degradation;ko00350//Tyrosine metabolism;ko00592//alpha-Linolenic acid metabolism	K18857	-	GO:0043167//ion binding;GO:0003824//catalytic activity;GO:0043169//cation binding;GO:0005488//binding	GO:0008152//metabolic process;GO:0044699//single-organism process;GO:0044710//single-organism metabolic process
Gene002173	CIL1386S0032	Isoform004805	CIL1386S0032	new	ADH1	alcohol dehydrogenase class-P; K18857 alcohol dehydrogenase class-P [EC:1.1.1.1]	Metabolism	Carbohydrate metabolism;Amino acid metabolism;Lipid metabolism;Global and Overview	ko01100//Metabolic pathways;ko01110//Biosynthesis of secondary metabolites;ko01120//Microbial metabolism in diverse environments;ko00010//Glycolysis / Gluconeogenesis;ko00071//Fatty acid degradation;ko00350//Tyrosine metabolism;ko00592//alpha-Linolenic acid metabolism	K18857	-	GO:0043169//cation binding;GO:0016614//oxidoreductase activity, acting on CH-OH group of donors;GO:0043167//ion binding;GO:0005488//binding;GO:0016616//oxidoreductase activity, acting on the CH-OH group of donors, NAD or NADP as acceptor;GO:0016491//oxidoreductase activity;GO:0003824//catalytic activity	GO:0044710//single-organism metabolic process;GO:0044699//single-organism process;GO:0008152//metabolic process
Gene002174	CIL1386S0034,CIL1386S0035,CIL1386S0036	Isoform004808	CIL1386S0034,CIL1386S0035,CIL1386S0036	new	ADH1	POPTRDRAFT_718546; alcohol-dehydrogenase family protein; K18857 alcohol dehydrogenase class-P [EC:1.1.1.1]	Metabolism	Global and Overview;Carbohydrate metabolism;Amino acid metabolism;Lipid metabolism	ko01100//Metabolic pathways;ko01110//Biosynthesis of secondary metabolites;ko01120//Microbial metabolism in diverse environments;ko00010//Glycolysis / Gluconeogenesis;ko00071//Fatty acid degradation;ko00350//Tyrosine metabolism;ko00592//alpha-Linolenic acid metabolism	K18857	-	GO:0016616//oxidoreductase activity, acting on the CH-OH group of donors, NAD or NADP as acceptor;GO:0016491//oxidoreductase activity;GO:0043167//ion binding;GO:0043169//cation binding;GO:0005488//binding;GO:0003824//catalytic activity;GO:0016614//oxidoreductase activity, acting on CH-OH group of donors	GO:0044710//single-organism metabolic process;GO:0008152//metabolic process;GO:0044699//single-organism process
Gene002174	CIL1386S0034,CIL1386S0035,CIL1386S0036	Isoform004809	CIL1386S0036	new	ADH1	alcohol dehydrogenase class-P; K18857 alcohol dehydrogenase class-P [EC:1.1.1.1]	Metabolism	Global and Overview;Amino acid metabolism;Lipid metabolism;Carbohydrate metabolism	ko01100//Metabolic pathways;ko01110//Biosynthesis of secondary metabolites;ko01120//Microbial metabolism in diverse environments;ko00010//Glycolysis / Gluconeogenesis;ko00071//Fatty acid degradation;ko00350//Tyrosine metabolism;ko00592//alpha-Linolenic acid metabolism	K18857	-	GO:0043169//cation binding;GO:0003824//catalytic activity;GO:0043167//ion binding;GO:0005488//binding	GO:0008152//metabolic process;GO:0044699//single-organism process;GO:0044710//single-organism metabolic process
Gene002175	CIL1386S0037	Isoform004812	CIL1386S0037	new	ADH1	alcohol dehydrogenase class-P; K18857 alcohol dehydrogenase class-P [EC:1.1.1.1]	Metabolism	Global and Overview;Lipid metabolism;Amino acid metabolism;Carbohydrate metabolism	ko01100//Metabolic pathways;ko01110//Biosynthesis of secondary metabolites;ko01130//Biosynthesis of antibiotics;ko01120//Microbial metabolism in diverse environments;ko00010//Glycolysis / Gluconeogenesis;ko00071//Fatty acid degradation;ko00350//Tyrosine metabolism;ko01220//Degradation of aromatic compounds	K00001	-	-	-
Gene000642	CIL1293S0070	Isoform001281	CIL1293S0070	known	ADH2	PREDICTED: alcohol dehydrogenase class-3 [Juglans regia]	Metabolism	Global and Overview;Amino acid metabolism;Lipid metabolism;Carbohydrate metabolism	ko01100//Metabolic pathways;ko01110//Biosynthesis of secondary metabolites;ko01200//Carbon metabolism;ko00010//Glycolysis / Gluconeogenesis;ko00071//Fatty acid degradation;ko00350//Tyrosine metabolism	K00121	-	GO:0016614//oxidoreductase activity, acting on CH-OH group of donors;GO:0005488//binding;GO:0016491//oxidoreductase activity;GO:0046872//metal ion binding;GO:0003824//catalytic activity;GO:0043167//ion binding;GO:0016616//oxidoreductase activity, acting on the CH-OH group of donors, NAD or NADP as acceptor;GO:0043169//cation binding;GO:0046914//transition metal ion binding	GO:0008152//metabolic process;GO:0044699//single-organism process;GO:0044710//single-organism metabolic process
Gene009055	CIL0957S0031	Isoform019967	CIL0957S0031	new	AGAL1	alpha-galactosidase; K07407 alpha-galactosidase [EC:3.2.1.22]	Metabolism	Lipid metabolism;Carbohydrate metabolism;Glycan biosynthesis and metabolism	ko00052//Galactose metabolism;ko00561//Glycerolipid metabolism;ko00600//Sphingolipid metabolism;ko00603//Glycosphingolipid biosynthesis - globo series	K07407	-	GO:0003824//catalytic activity;GO:0016787//hydrolase activity;GO:0015925//galactosidase activity;GO:0004557//alpha-galactosidase activity;GO:0004553//hydrolase activity, hydrolyzing O-glycosyl compounds;GO:0016798//hydrolase activity, acting on glycosyl bonds	GO:0008152//metabolic process;GO:0044238//primary metabolic process
Gene001939	CIL1370S0030	Isoform004261	CIL1370S0030	known	AGAL3	PREDICTED: alpha-galactosidase 3 isoform X1 [Juglans regia]	Metabolism	Lipid metabolism;Glycan biosynthesis and metabolism;Carbohydrate metabolism;Global and Overview	ko01100//Metabolic pathways;ko00052//Galactose metabolism;ko00561//Glycerolipid metabolism;ko00600//Sphingolipid metabolism;ko00603//Glycosphingolipid biosynthesis - globo series	K07407	-	-	-
Gene001939	CIL1370S0030	Isoform004262	CIL1370S0030	new	AGAL3	alpha-galactosidase; K07407 alpha-galactosidase [EC:3.2.1.22]	Metabolism	Glycan biosynthesis and metabolism;Carbohydrate metabolism;Lipid metabolism	ko00052//Galactose metabolism;ko00561//Glycerolipid metabolism;ko00600//Sphingolipid metabolism;ko00603//Glycosphingolipid biosynthesis - globo series	K07407	-	-	-
Gene001939	CIL1370S0030	Isoform004263	CIL1370S0030	new	AGAL3	alpha-galactosidase; K07407 alpha-galactosidase [EC:3.2.1.22]	Metabolism	Lipid metabolism;Carbohydrate metabolism;Glycan biosynthesis and metabolism	ko00052//Galactose metabolism;ko00561//Glycerolipid metabolism;ko00600//Sphingolipid metabolism;ko00603//Glycosphingolipid biosynthesis - globo series	K07407	-	-	-
Gene001939	CIL1370S0030	Isoform004264	CIL1370S0030	new	AGAL3	alpha-galactosidase; K07407 alpha-galactosidase [EC:3.2.1.22]	Metabolism	Glycan biosynthesis and metabolism;Carbohydrate metabolism;Lipid metabolism	ko00052//Galactose metabolism;ko00561//Glycerolipid metabolism;ko00600//Sphingolipid metabolism;ko00603//Glycosphingolipid biosynthesis - globo series	K07407	GO:0044464//cell part;GO:0043226//organelle;GO:0005623//cell;GO:0043227//membrane-bounded organelle;GO:0043229//intracellular organelle;GO:0043231//intracellular membrane-bounded organelle;GO:0005576//extracellular region;GO:0005622//intracellular;GO:0044424//intracellular part	GO:0004553//hydrolase activity, hydrolyzing O-glycosyl compounds;GO:0004557//alpha-galactosidase activity;GO:0003824//catalytic activity;GO:0015925//galactosidase activity;GO:0016787//hydrolase activity;GO:0016798//hydrolase activity, acting on glycosyl bonds	GO:0044281//small molecule metabolic process;GO:0044237//cellular metabolic process;GO:0051641//cellular localization;GO:0051179//localization;GO:0006886//intracellular protein transport;GO:0006629//lipid metabolic process;GO:0045184//establishment of protein localization;GO:0016049//cell growth;GO:0016042//lipid catabolic process;GO:0048193//Golgi vesicle transport;GO:0048468//cell development;G…
Gene005374	CIL0240S0006	Isoform011866	CIL0240S0006	new	AGPAT6	glycerol-3-phosphate acyltransferase 3; K13506 glycerol-3-phosphate O-acyltransferase 3/4 [EC:2.3.1.15]	Metabolism	Lipid metabolism;Global and Overview	ko01100//Metabolic pathways;ko01110//Biosynthesis of secondary metabolites;ko00564//Glycerophospholipid metabolism;ko00561//Glycerolipid metabolism	K13506	-	GO:0003824//catalytic activity;GO:0016740//transferase activity	-
Gene004993	CIL0156S0025	Isoform010957	CIL0156S0025	new	Agpat9	glycerol-3-phosphate acyltransferase 3-like; K13506 glycerol-3-phosphate O-acyltransferase 3/4 [EC:2.3.1.15]	Metabolism	Lipid metabolism;Global and Overview	ko01100//Metabolic pathways;ko01110//Biosynthesis of secondary metabolites;ko00564//Glycerophospholipid metabolism;ko00561//Glycerolipid metabolism	K13506	-	-	-
Gene005374	CIL0240S0006	Isoform011867	CIL0240S0006	new	Agpat9	glycerol-3-phosphate acyltransferase 3; K13506 glycerol-3-phosphate O-acyltransferase 3/4 [EC:2.3.1.15]	Metabolism	Global and Overview;Lipid metabolism	ko01100//Metabolic pathways;ko01110//Biosynthesis of secondary metabolites;ko00564//Glycerophospholipid metabolism;ko00561//Glycerolipid metabolism	K13506	-	-	-
Gene015937	CIL1218S0050	Isoform035738	CIL1218S0050	new	AIM1	Enoyl-CoA hydratase/isomerase family; K10527 enoyl-CoA hydratase/3-hydroxyacyl-CoA dehydrogenase [EC:4.2.1.17 1.1.1.35 1.1.1.211]	Metabolism	Global and Overview;Lipid metabolism	ko01100//Metabolic pathways;ko01110//Biosynthesis of secondary metabolites;ko01212//Fatty acid metabolism;ko00071//Fatty acid degradation;ko00592//alpha-Linolenic acid metabolism	K10527	-	GO:0016616//oxidoreductase activity, acting on the CH-OH group of donors, NAD or NADP as acceptor;GO:0016614//oxidoreductase activity, acting on CH-OH group of donors;GO:0016491//oxidoreductase activity;GO:0005488//binding;GO:0016856//racemase and epimerase activity, acting on hydroxy acids and derivatives;GO:0016853//isomerase activity;GO:0016854//racemase and epimerase activity;GO:0003824//cata…	GO:0044699//single-organism process;GO:0071704//organic substance metabolic process;GO:0009987//cellular process;GO:0044710//single-organism metabolic process;GO:0019752//carboxylic acid metabolic process;GO:0043436//oxoacid metabolic process;GO:0044281//small molecule metabolic process;GO:0008152//metabolic process;GO:0044237//cellular metabolic process;GO:0032787//monocarboxylic acid metabolic …
Gene015937	CIL1218S0050	Isoform035740	CIL1218S0050	new	AIM1	Enoyl-CoA hydratase/isomerase family; K10527 enoyl-CoA hydratase/3-hydroxyacyl-CoA dehydrogenase [EC:4.2.1.17 1.1.1.35 1.1.1.211]	Metabolism	Global and Overview;Lipid metabolism	ko01100//Metabolic pathways;ko01110//Biosynthesis of secondary metabolites;ko01212//Fatty acid metabolism;ko00071//Fatty acid degradation;ko00592//alpha-Linolenic acid metabolism	K10527	-	GO:0048037//cofactor binding;GO:0016614//oxidoreductase activity, acting on CH-OH group of donors;GO:0016491//oxidoreductase activity;GO:0016616//oxidoreductase activity, acting on the CH-OH group of donors, NAD or NADP as acceptor;GO:0003824//catalytic activity;GO:0016854//racemase and epimerase activity;GO:0016856//racemase and epimerase activity, acting on hydroxy acids and derivatives;GO:0005…	GO:0019752//carboxylic acid metabolic process;GO:0044237//cellular metabolic process;GO:0032787//monocarboxylic acid metabolic process;GO:0008152//metabolic process;GO:0044699//single-organism process;GO:0044710//single-organism metabolic process;GO:0006082//organic acid metabolic process;GO:0043436//oxoacid metabolic process;GO:0044763//single-organism cellular process;GO:0009987//cellular proce…
Gene015937	CIL1218S0050	Isoform035741	CIL1218S0050	new	AIM1	peroxisomal fatty acid beta-oxidation multifunctional protein AIM1; K10527 enoyl-CoA hydratase/3-hydroxyacyl-CoA dehydrogenase [EC:4.2.1.17 1.1.1.35 1.1.1.211]	Metabolism	Lipid metabolism;Global and Overview	ko01100//Metabolic pathways;ko01110//Biosynthesis of secondary metabolites;ko01212//Fatty acid metabolism;ko00071//Fatty acid degradation;ko00592//alpha-Linolenic acid metabolism	K10527	-	GO:0005488//binding;GO:0016616//oxidoreductase activity, acting on the CH-OH group of donors, NAD or NADP as acceptor;GO:0016491//oxidoreductase activity;GO:0016614//oxidoreductase activity, acting on CH-OH group of donors;GO:0048037//cofactor binding;GO:0003824//catalytic activity	GO:0043436//oxoacid metabolic process;GO:0071704//organic substance metabolic process;GO:0006082//organic acid metabolic process;GO:0044699//single-organism process;GO:0008152//metabolic process;GO:0009987//cellular process;GO:0044281//small molecule metabolic process;GO:0044763//single-organism cellular process;GO:0032787//monocarboxylic acid metabolic process;GO:0044710//single-organism metabol…
Gene015937	CIL1218S0050	Isoform035742	CIL1218S0050	new	AIM1	Enoyl-CoA hydratase/isomerase family; K10527 enoyl-CoA hydratase/3-hydroxyacyl-CoA dehydrogenase [EC:4.2.1.17 1.1.1.35 1.1.1.211]	Metabolism	Global and Overview;Lipid metabolism	ko01100//Metabolic pathways;ko01110//Biosynthesis of secondary metabolites;ko01212//Fatty acid metabolism;ko00071//Fatty acid degradation;ko00592//alpha-Linolenic acid metabolism	K10527	-	GO:0003824//catalytic activity;GO:0016614//oxidoreductase activity, acting on CH-OH group of donors;GO:0005488//binding;GO:0016491//oxidoreductase activity;GO:0048037//cofactor binding;GO:0016853//isomerase activity;GO:0016856//racemase and epimerase activity, acting on hydroxy acids and derivatives;GO:0016616//oxidoreductase activity, acting on the CH-OH group of donors, NAD or NADP as acceptor;…	GO:0044710//single-organism metabolic process;GO:0019752//carboxylic acid metabolic process;GO:0044281//small molecule metabolic process;GO:0009987//cellular process;GO:0032787//monocarboxylic acid metabolic process;GO:0044763//single-organism cellular process;GO:0006082//organic acid metabolic process;GO:0071704//organic substance metabolic process;GO:0044237//cellular metabolic process;GO:00446…
Gene015937	CIL1218S0050	Isoform035744	CIL1218S0050	new	AIM1	Enoyl-CoA hydratase/isomerase family; K10527 enoyl-CoA hydratase/3-hydroxyacyl-CoA dehydrogenase [EC:4.2.1.17 1.1.1.35 1.1.1.211]	Metabolism	Lipid metabolism;Global and Overview	ko01100//Metabolic pathways;ko01110//Biosynthesis of secondary metabolites;ko01212//Fatty acid metabolism;ko00071//Fatty acid degradation;ko00592//alpha-Linolenic acid metabolism	K10527	-	GO:0016491//oxidoreductase activity;GO:0005488//binding;GO:0003824//catalytic activity;GO:0048037//cofactor binding;GO:0016614//oxidoreductase activity, acting on CH-OH group of donors;GO:0016616//oxidoreductase activity, acting on the CH-OH group of donors, NAD or NADP as acceptor	GO:0044763//single-organism cellular process;GO:0044237//cellular metabolic process;GO:0032787//monocarboxylic acid metabolic process;GO:0044710//single-organism metabolic process;GO:0043436//oxoacid metabolic process;GO:0008152//metabolic process;GO:0044281//small molecule metabolic process;GO:0019752//carboxylic acid metabolic process;GO:0009987//cellular process;GO:0044699//single-organism pro…
Gene015937	CIL1218S0050	Isoform035745	CIL1218S0050	new	AIM1	peroxisomal fatty acid beta-oxidation multifunctional protein AIM1; K10527 enoyl-CoA hydratase/3-hydroxyacyl-CoA dehydrogenase [EC:4.2.1.17 1.1.1.35 1.1.1.211]	Metabolism	Global and Overview;Lipid metabolism	ko01100//Metabolic pathways;ko01110//Biosynthesis of secondary metabolites;ko01212//Fatty acid metabolism;ko00071//Fatty acid degradation;ko00592//alpha-Linolenic acid metabolism	K10527	-	GO:0048037//cofactor binding;GO:0005488//binding;GO:0016616//oxidoreductase activity, acting on the CH-OH group of donors, NAD or NADP as acceptor;GO:0016491//oxidoreductase activity;GO:0016614//oxidoreductase activity, acting on CH-OH group of donors;GO:0003824//catalytic activity	GO:0044281//small molecule metabolic process;GO:0008152//metabolic process;GO:0071704//organic substance metabolic process;GO:0044763//single-organism cellular process;GO:0044237//cellular metabolic process;GO:0043436//oxoacid metabolic process;GO:0032787//monocarboxylic acid metabolic process;GO:0044699//single-organism process;GO:0044710//single-organism metabolic process;GO:0009987//cellular p…
Gene015937	CIL1218S0050	Isoform035746	CIL1218S0050	new	AIM1	peroxisomal fatty acid beta-oxidation multifunctional protein AIM1; K10527 enoyl-CoA hydratase/3-hydroxyacyl-CoA dehydrogenase [EC:4.2.1.17 1.1.1.35 1.1.1.211]	Metabolism	Lipid metabolism;Global and Overview	ko01100//Metabolic pathways;ko01110//Biosynthesis of secondary metabolites;ko01212//Fatty acid metabolism;ko00071//Fatty acid degradation;ko00592//alpha-Linolenic acid metabolism	K10527	-	GO:0005488//binding;GO:0016616//oxidoreductase activity, acting on the CH-OH group of donors, NAD or NADP as acceptor;GO:0016614//oxidoreductase activity, acting on CH-OH group of donors;GO:0016491//oxidoreductase activity;GO:0048037//cofactor binding;GO:0003824//catalytic activity	GO:0032787//monocarboxylic acid metabolic process;GO:0044281//small molecule metabolic process;GO:0071704//organic substance metabolic process;GO:0044763//single-organism cellular process;GO:0044699//single-organism process;GO:0043436//oxoacid metabolic process;GO:0019752//carboxylic acid metabolic process;GO:0044710//single-organism metabolic process;GO:0009987//cellular process;GO:0044237//cell…
Gene015937	CIL1218S0050	Isoform035747	CIL1218S0050	new	AIM1	Enoyl-CoA hydratase/isomerase family; K10527 enoyl-CoA hydratase/3-hydroxyacyl-CoA dehydrogenase [EC:4.2.1.17 1.1.1.35 1.1.1.211]	Metabolism	Lipid metabolism;Global and Overview	ko01100//Metabolic pathways;ko01110//Biosynthesis of secondary metabolites;ko01212//Fatty acid metabolism;ko00071//Fatty acid degradation;ko00592//alpha-Linolenic acid metabolism	K10527	-	GO:0016853//isomerase activity;GO:0016614//oxidoreductase activity, acting on CH-OH group of donors;GO:0005488//binding;GO:0016856//racemase and epimerase activity, acting on hydroxy acids and derivatives;GO:0016491//oxidoreductase activity;GO:0016616//oxidoreductase activity, acting on the CH-OH group of donors, NAD or NADP as acceptor;GO:0003824//catalytic activity;GO:0016854//racemase and epim…	GO:0009987//cellular process;GO:0071704//organic substance metabolic process;GO:0044710//single-organism metabolic process;GO:0044281//small molecule metabolic process;GO:0043436//oxoacid metabolic process;GO:0032787//monocarboxylic acid metabolic process;GO:0044699//single-organism process;GO:0006082//organic acid metabolic process;GO:0019752//carboxylic acid metabolic process;GO:0008152//metabo…
Gene016078	CIL1224S0031	Isoform036064	CIL1224S0031	new	AIM1	peroxisomal fatty acid beta-oxidation multifunctional protein AIM1; K10527 enoyl-CoA hydratase/3-hydroxyacyl-CoA dehydrogenase [EC:4.2.1.17 1.1.1.35 1.1.1.211]	Metabolism	Global and Overview;Lipid metabolism	ko01100//Metabolic pathways;ko01110//Biosynthesis of secondary metabolites;ko01212//Fatty acid metabolism;ko00071//Fatty acid degradation;ko00592//alpha-Linolenic acid metabolism	K10527	-	GO:0016614//oxidoreductase activity, acting on CH-OH group of donors;GO:0005488//binding;GO:0016491//oxidoreductase activity;GO:0003824//catalytic activity;GO:0016616//oxidoreductase activity, acting on the CH-OH group of donors, NAD or NADP as acceptor;GO:0048037//cofactor binding	GO:0006082//organic acid metabolic process;GO:0044699//single-organism process;GO:0044763//single-organism cellular process;GO:0044710//single-organism metabolic process;GO:0044237//cellular metabolic process;GO:0008152//metabolic process;GO:0043436//oxoacid metabolic process;GO:0032787//monocarboxylic acid metabolic process;GO:0009987//cellular process;GO:0071704//organic substance metabolic pro…
Gene016078	CIL1224S0031	Isoform036065	CIL1224S0031	new	AIM1	peroxisomal fatty acid beta-oxidation multifunctional protein AIM1; K10527 enoyl-CoA hydratase/3-hydroxyacyl-CoA dehydrogenase [EC:4.2.1.17 1.1.1.35 1.1.1.211]	Metabolism	Global and Overview;Lipid metabolism	ko01100//Metabolic pathways;ko01110//Biosynthesis of secondary metabolites;ko01212//Fatty acid metabolism;ko00071//Fatty acid degradation;ko00592//alpha-Linolenic acid metabolism	K10527	-	GO:0003824//catalytic activity;GO:0048037//cofactor binding;GO:0016491//oxidoreductase activity;GO:0005488//binding;GO:0016614//oxidoreductase activity, acting on CH-OH group of donors;GO:0016616//oxidoreductase activity, acting on the CH-OH group of donors, NAD or NADP as acceptor	GO:0009987//cellular process;GO:0043436//oxoacid metabolic process;GO:0044710//single-organism metabolic process;GO:0032787//monocarboxylic acid metabolic process;GO:0044281//small molecule metabolic process;GO:0071704//organic substance metabolic process;GO:0044237//cellular metabolic process;GO:0006082//organic acid metabolic process;GO:0008152//metabolic process;GO:0044763//single-organism cel…
Gene016078	CIL1224S0031	Isoform036067	CIL1224S0031	new	AIM1	peroxisomal fatty acid beta-oxidation multifunctional protein AIM1; K10527 enoyl-CoA hydratase/3-hydroxyacyl-CoA dehydrogenase [EC:4.2.1.17 1.1.1.35 1.1.1.211]	Metabolism	Global and Overview;Lipid metabolism	ko01100//Metabolic pathways;ko01110//Biosynthesis of secondary metabolites;ko01212//Fatty acid metabolism;ko00071//Fatty acid degradation;ko00592//alpha-Linolenic acid metabolism	K10527	-	GO:0005488//binding;GO:0016614//oxidoreductase activity, acting on CH-OH group of donors;GO:0016616//oxidoreductase activity, acting on the CH-OH group of donors, NAD or NADP as acceptor;GO:0048037//cofactor binding;GO:0016491//oxidoreductase activity;GO:0003824//catalytic activity	GO:0044710//single-organism metabolic process;GO:0043436//oxoacid metabolic process;GO:0032787//monocarboxylic acid metabolic process;GO:0008152//metabolic process;GO:0044699//single-organism process;GO:0006082//organic acid metabolic process;GO:0044281//small molecule metabolic process;GO:0044763//single-organism cellular process;GO:0019752//carboxylic acid metabolic process;GO:0071704//organic …
Gene016078	CIL1224S0031	Isoform036068	CIL1224S0031	new	AIM1	peroxisomal fatty acid beta-oxidation multifunctional protein AIM1; K10527 enoyl-CoA hydratase/3-hydroxyacyl-CoA dehydrogenase [EC:4.2.1.17 1.1.1.35 1.1.1.211]	Metabolism	Global and Overview;Lipid metabolism	ko01100//Metabolic pathways;ko01110//Biosynthesis of secondary metabolites;ko01212//Fatty acid metabolism;ko00071//Fatty acid degradation;ko00592//alpha-Linolenic acid metabolism	K10527	-	GO:0016491//oxidoreductase activity;GO:0048037//cofactor binding;GO:0016616//oxidoreductase activity, acting on the CH-OH group of donors, NAD or NADP as acceptor;GO:0003824//catalytic activity;GO:0005488//binding;GO:0016614//oxidoreductase activity, acting on CH-OH group of donors	GO:0044710//single-organism metabolic process;GO:0044699//single-organism process;GO:0006082//organic acid metabolic process;GO:0044763//single-organism cellular process;GO:0008152//metabolic process;GO:0009987//cellular process;GO:0044281//small molecule metabolic process;GO:0019752//carboxylic acid metabolic process;GO:0043436//oxoacid metabolic process;GO:0044237//cellular metabolic process;GO…
Gene016078	CIL1224S0031	Isoform036069	CIL1224S0031	new	AIM1	peroxisomal fatty acid beta-oxidation multifunctional protein AIM1; K10527 enoyl-CoA hydratase/3-hydroxyacyl-CoA dehydrogenase [EC:4.2.1.17 1.1.1.35 1.1.1.211]	Metabolism	Global and Overview;Lipid metabolism	ko01100//Metabolic pathways;ko01110//Biosynthesis of secondary metabolites;ko01212//Fatty acid metabolism;ko00071//Fatty acid degradation;ko00592//alpha-Linolenic acid metabolism	K10527	-	GO:0003824//catalytic activity;GO:0016614//oxidoreductase activity, acting on CH-OH group of donors;GO:0048037//cofactor binding;GO:0016491//oxidoreductase activity;GO:0016616//oxidoreductase activity, acting on the CH-OH group of donors, NAD or NADP as acceptor;GO:0005488//binding	GO:0043436//oxoacid metabolic process;GO:0044763//single-organism cellular process;GO:0044699//single-organism process;GO:0006082//organic acid metabolic process;GO:0032787//monocarboxylic acid metabolic process;GO:0008152//metabolic process;GO:0044237//cellular metabolic process;GO:0009987//cellular process;GO:0044710//single-organism metabolic process;GO:0044281//small molecule metabolic proces…
Gene000932	CIL1310S0039	Isoform001978	CIL1310S0039	new	ALDH2B4	aldehyde dehydrogenase family 2 member B4, mitochondrial; K00128 aldehyde dehydrogenase (NAD+) [EC:1.2.1.3]	Metabolism	Global and Overview;Amino acid metabolism;Metabolism of terpenoids and polyketides;Lipid metabolism;Metabolism of other amino acids;Carbohydrate metabolism	ko01100//Metabolic pathways;ko01110//Biosynthesis of secondary metabolites;ko01130//Biosynthesis of antibiotics;ko01120//Microbial metabolism in diverse environments;ko00010//Glycolysis / Gluconeogenesis;ko00620//Pyruvate metabolism;ko00071//Fatty acid degradation;ko00280//Valine, leucine and isoleucine degradation;ko00561//Glycerolipid metabolism;ko00330//Arginine and proline metabolism;ko00410/…	K00128	-	GO:0016903//oxidoreductase activity, acting on the aldehyde or oxo group of donors;GO:0016491//oxidoreductase activity;GO:0003824//catalytic activity	GO:0044699//single-organism process;GO:0008152//metabolic process;GO:0044710//single-organism metabolic process
Gene000932	CIL1310S0039	Isoform001979	CIL1310S0039	known	ALDH2B4	PREDICTED: aldehyde dehydrogenase family 2 member B4, mitochondrial isoform X1 [Juglans regia]	Metabolism	Global and Overview;Carbohydrate metabolism;Amino acid metabolism;Lipid metabolism;Metabolism of other amino acids	ko01100//Metabolic pathways;ko01110//Biosynthesis of secondary metabolites;ko00010//Glycolysis / Gluconeogenesis;ko00620//Pyruvate metabolism;ko00071//Fatty acid degradation;ko00280//Valine, leucine and isoleucine degradation;ko00561//Glycerolipid metabolism;ko00330//Arginine and proline metabolism;ko00410//beta-Alanine metabolism;ko00310//Lysine degradation;ko00053//Ascorbate and aldarate metabo…	K00128	-	GO:0016903//oxidoreductase activity, acting on the aldehyde or oxo group of donors;GO:0016491//oxidoreductase activity;GO:0003824//catalytic activity	GO:0044699//single-organism process;GO:0008152//metabolic process;GO:0044710//single-organism metabolic process
Gene000932	CIL1310S0039	Isoform001980	CIL1310S0039	new	ALDH2B4	aldehyde dehydrogenase family 2 member B4, mitochondrial; K00128 aldehyde dehydrogenase (NAD+) [EC:1.2.1.3]	Metabolism	Global and Overview;Carbohydrate metabolism;Metabolism of other amino acids;Lipid metabolism;Amino acid metabolism	ko01100//Metabolic pathways;ko01110//Biosynthesis of secondary metabolites;ko01130//Biosynthesis of antibiotics;ko01120//Microbial metabolism in diverse environments;ko00010//Glycolysis / Gluconeogenesis;ko00620//Pyruvate metabolism;ko00071//Fatty acid degradation;ko00280//Valine, leucine and isoleucine degradation;ko00561//Glycerolipid metabolism;ko00330//Arginine and proline metabolism;ko00410/…	K00128	-	GO:0016491//oxidoreductase activity;GO:0003824//catalytic activity;GO:0016903//oxidoreductase activity, acting on the aldehyde or oxo group of donors	GO:0044699//single-organism process;GO:0008152//metabolic process;GO:0044710//single-organism metabolic process
Gene000932	CIL1310S0039	Isoform001981	CIL1310S0039	new	ALDH2B4	aldehyde dehydrogenase family 2 member B4, mitochondrial-like; K00128 aldehyde dehydrogenase (NAD+) [EC:1.2.1.3]	Metabolism	Global and Overview;Carbohydrate metabolism;Amino acid metabolism;Metabolism of terpenoids and polyketides;Lipid metabolism;Metabolism of other amino acids	ko01100//Metabolic pathways;ko01110//Biosynthesis of secondary metabolites;ko01130//Biosynthesis of antibiotics;ko01120//Microbial metabolism in diverse environments;ko00010//Glycolysis / Gluconeogenesis;ko00620//Pyruvate metabolism;ko00071//Fatty acid degradation;ko00280//Valine, leucine and isoleucine degradation;ko00561//Glycerolipid metabolism;ko00330//Arginine and proline metabolism;ko00410/…	K00128	-	GO:0016491//oxidoreductase activity;GO:0016903//oxidoreductase activity, acting on the aldehyde or oxo group of donors;GO:0003824//catalytic activity	GO:0008152//metabolic process;GO:0044710//single-organism metabolic process;GO:0044699//single-organism process
Gene006931	CIL0897S0031	Isoform015167	CIL0897S0031	new	ALDH2B7	aldehyde dehydrogenase family 2 member B7, mitochondrial-like; K00128 aldehyde dehydrogenase (NAD+) [EC:1.2.1.3]	Metabolism	Carbohydrate metabolism;Amino acid metabolism;Lipid metabolism;Metabolism of other amino acids;Global and Overview	ko01100//Metabolic pathways;ko01110//Biosynthesis of secondary metabolites;ko01130//Biosynthesis of antibiotics;ko01120//Microbial metabolism in diverse environments;ko00010//Glycolysis / Gluconeogenesis;ko00620//Pyruvate metabolism;ko00071//Fatty acid degradation;ko00280//Valine, leucine and isoleucine degradation;ko00561//Glycerolipid metabolism;ko00330//Arginine and proline metabolism;ko00410/…	K00128	-	-	-
Gene006931	CIL0897S0031	Isoform015168	CIL0897S0031	new	ALDH2B7	aldehyde dehydrogenase family 2 member B7, mitochondrial-like; K00128 aldehyde dehydrogenase (NAD+) [EC:1.2.1.3]	Metabolism	Global and Overview;Carbohydrate metabolism;Amino acid metabolism;Metabolism of other amino acids;Lipid metabolism	ko01100//Metabolic pathways;ko01110//Biosynthesis of secondary metabolites;ko01130//Biosynthesis of antibiotics;ko01120//Microbial metabolism in diverse environments;ko00010//Glycolysis / Gluconeogenesis;ko00620//Pyruvate metabolism;ko00071//Fatty acid degradation;ko00280//Valine, leucine and isoleucine degradation;ko00561//Glycerolipid metabolism;ko00330//Arginine and proline metabolism;ko00410/…	K00128	-	-	-
Gene006931	CIL0897S0031	Isoform015169	CIL0897S0031	new	ALDH2B7	aldehyde dehydrogenase family 2 member B7, mitochondrial-like; K00128 aldehyde dehydrogenase (NAD+) [EC:1.2.1.3]	Metabolism	Carbohydrate metabolism;Amino acid metabolism;Metabolism of other amino acids;Lipid metabolism;Global and Overview	ko01100//Metabolic pathways;ko01110//Biosynthesis of secondary metabolites;ko01130//Biosynthesis of antibiotics;ko01120//Microbial metabolism in diverse environments;ko00010//Glycolysis / Gluconeogenesis;ko00620//Pyruvate metabolism;ko00071//Fatty acid degradation;ko00280//Valine, leucine and isoleucine degradation;ko00561//Glycerolipid metabolism;ko00330//Arginine and proline metabolism;ko00410/…	K00128	-	-	-
Gene014858	CIL1167S0033	Isoform033288	CIL1167S0033	new	ALDH2B7	aldehyde dehydrogenase family 2 member B7, mitochondrial-like; K00128 aldehyde dehydrogenase (NAD+) [EC:1.2.1.3]	Metabolism	Carbohydrate metabolism;Amino acid metabolism;Lipid metabolism;Metabolism of terpenoids and polyketides;Metabolism of other amino acids;Global and Overview	ko01100//Metabolic pathways;ko01110//Biosynthesis of secondary metabolites;ko01130//Biosynthesis of antibiotics;ko01120//Microbial metabolism in diverse environments;ko00010//Glycolysis / Gluconeogenesis;ko00620//Pyruvate metabolism;ko00071//Fatty acid degradation;ko00280//Valine, leucine and isoleucine degradation;ko00561//Glycerolipid metabolism;ko00330//Arginine and proline metabolism;ko00410/…	K00128	-	-	-
Gene014240	CIL0102S0017	Isoform031736	CIL0102S0017	new	ALDH3F1	aldehyde dehydrogenase family 3 member F1-like; K00128 aldehyde dehydrogenase (NAD+) [EC:1.2.1.3]	Metabolism	Global and Overview;Carbohydrate metabolism;Metabolism of other amino acids;Metabolism of terpenoids and polyketides;Lipid metabolism;Amino acid metabolism	ko01100//Metabolic pathways;ko01110//Biosynthesis of secondary metabolites;ko01130//Biosynthesis of antibiotics;ko01120//Microbial metabolism in diverse environments;ko00010//Glycolysis / Gluconeogenesis;ko00620//Pyruvate metabolism;ko00071//Fatty acid degradation;ko00280//Valine, leucine and isoleucine degradation;ko00561//Glycerolipid metabolism;ko00330//Arginine and proline metabolism;ko00410/…	K00128	-	-	-
Gene016294	CIL1235S0028	Isoform036588	CIL1235S0028	new	ALDH3F1	aldehyde dehydrogenase family 3 member F1-like; K00128 aldehyde dehydrogenase (NAD+) [EC:1.2.1.3]	Metabolism	Global and Overview;Carbohydrate metabolism;Metabolism of terpenoids and polyketides;Metabolism of other amino acids;Lipid metabolism;Amino acid metabolism	ko01100//Metabolic pathways;ko01110//Biosynthesis of secondary metabolites;ko01130//Biosynthesis of antibiotics;ko01120//Microbial metabolism in diverse environments;ko00010//Glycolysis / Gluconeogenesis;ko00620//Pyruvate metabolism;ko00071//Fatty acid degradation;ko00280//Valine, leucine and isoleucine degradation;ko00561//Glycerolipid metabolism;ko00330//Arginine and proline metabolism;ko00410/…	K00128	-	-	-
Gene002006	CIL1372S0030	Isoform004411	CIL1372S0030	new	ALDH3H1	aldehyde dehydrogenase family 3 member H1; K00128 aldehyde dehydrogenase (NAD+) [EC:1.2.1.3]	Metabolism	Global and Overview;Lipid metabolism;Metabolism of other amino acids;Amino acid metabolism;Carbohydrate metabolism	ko01100//Metabolic pathways;ko01110//Biosynthesis of secondary metabolites;ko01130//Biosynthesis of antibiotics;ko01120//Microbial metabolism in diverse environments;ko00010//Glycolysis / Gluconeogenesis;ko00620//Pyruvate metabolism;ko00071//Fatty acid degradation;ko00280//Valine, leucine and isoleucine degradation;ko00561//Glycerolipid metabolism;ko00330//Arginine and proline metabolism;ko00410/…	K00128	-	-	-
Gene002006	CIL1372S0030	Isoform004412	CIL1372S0030	new	ALDH3H1	aldehyde dehydrogenase family 3 member H1; K00128 aldehyde dehydrogenase (NAD+) [EC:1.2.1.3]	Metabolism	Global and Overview;Lipid metabolism;Metabolism of other amino acids;Amino acid metabolism;Carbohydrate metabolism	ko01100//Metabolic pathways;ko01110//Biosynthesis of secondary metabolites;ko01130//Biosynthesis of antibiotics;ko01120//Microbial metabolism in diverse environments;ko00010//Glycolysis / Gluconeogenesis;ko00620//Pyruvate metabolism;ko00071//Fatty acid degradation;ko00280//Valine, leucine and isoleucine degradation;ko00561//Glycerolipid metabolism;ko00330//Arginine and proline metabolism;ko00410/…	K00128	-	-	-
Gene002006	CIL1372S0030	Isoform004413	CIL1372S0030	new	ALDH3H1	aldehyde dehydrogenase family 3 member H1; K00128 aldehyde dehydrogenase (NAD+) [EC:1.2.1.3]	Metabolism	Carbohydrate metabolism;Amino acid metabolism;Lipid metabolism;Metabolism of other amino acids;Global and Overview	ko01100//Metabolic pathways;ko01110//Biosynthesis of secondary metabolites;ko01130//Biosynthesis of antibiotics;ko01120//Microbial metabolism in diverse environments;ko00010//Glycolysis / Gluconeogenesis;ko00620//Pyruvate metabolism;ko00071//Fatty acid degradation;ko00280//Valine, leucine and isoleucine degradation;ko00561//Glycerolipid metabolism;ko00330//Arginine and proline metabolism;ko00410/…	K00128	-	-	-
Gene003907	CIL1512S0036	Isoform008543	CIL1512S0036	new	ALDH3H1	aldehyde dehydrogenase family 3 member H1; K00128 aldehyde dehydrogenase (NAD+) [EC:1.2.1.3]	Metabolism	Global and Overview;Amino acid metabolism;Metabolism of other amino acids;Lipid metabolism;Carbohydrate metabolism	ko01100//Metabolic pathways;ko01110//Biosynthesis of secondary metabolites;ko01130//Biosynthesis of antibiotics;ko01120//Microbial metabolism in diverse environments;ko00010//Glycolysis / Gluconeogenesis;ko00620//Pyruvate metabolism;ko00071//Fatty acid degradation;ko00280//Valine, leucine and isoleucine degradation;ko00561//Glycerolipid metabolism;ko00330//Arginine and proline metabolism;ko00410/…	K00128	-	-	-
Gene002006	CIL1372S0030	Isoform004409	CIL1372S0030	new	ALDH3I1	aldehyde dehydrogenase family 3 member H1; K00128 aldehyde dehydrogenase (NAD+) [EC:1.2.1.3]	Metabolism	Global and Overview;Carbohydrate metabolism;Lipid metabolism;Metabolism of other amino acids;Amino acid metabolism	ko01100//Metabolic pathways;ko01110//Biosynthesis of secondary metabolites;ko01130//Biosynthesis of antibiotics;ko01120//Microbial metabolism in diverse environments;ko00010//Glycolysis / Gluconeogenesis;ko00620//Pyruvate metabolism;ko00071//Fatty acid degradation;ko00280//Valine, leucine and isoleucine degradation;ko00561//Glycerolipid metabolism;ko00330//Arginine and proline metabolism;ko00410/…	K00128	-	-	-
Gene002006	CIL1372S0030	Isoform004410	CIL1372S0030	new	ALDH3I1	aldehyde dehydrogenase family 3 member H1; K00128 aldehyde dehydrogenase (NAD+) [EC:1.2.1.3]	Metabolism	Amino acid metabolism;Lipid metabolism;Metabolism of other amino acids;Carbohydrate metabolism;Global and Overview	ko01100//Metabolic pathways;ko01110//Biosynthesis of secondary metabolites;ko01130//Biosynthesis of antibiotics;ko01120//Microbial metabolism in diverse environments;ko00010//Glycolysis / Gluconeogenesis;ko00620//Pyruvate metabolism;ko00071//Fatty acid degradation;ko00280//Valine, leucine and isoleucine degradation;ko00561//Glycerolipid metabolism;ko00330//Arginine and proline metabolism;ko00410/…	K00128	-	-	-
Gene003930	CIL1515S0046	Isoform008581	CIL1515S0046	known	AOC	PREDICTED: allene oxide cyclase, chloroplastic-like [Juglans regia]	Metabolism	Global and Overview;Lipid metabolism	ko01100//Metabolic pathways;ko01110//Biosynthesis of secondary metabolites;ko00592//alpha-Linolenic acid metabolism	K10525	GO:0005622//intracellular;GO:0043229//intracellular organelle;GO:0044464//cell part;GO:0044424//intracellular part;GO:0005623//cell;GO:0043227//membrane-bounded organelle;GO:0044444//cytoplasmic part;GO:0043226//organelle;GO:0005737//cytoplasm;GO:0009536//plastid;GO:0043231//intracellular membrane-bounded organelle	GO:0009975//cyclase activity;GO:0003824//catalytic activity	-
Gene014171	CIL1145S0028	Isoform031582	CIL1145S0028	new	AOC3	allene oxide cyclase 3, chloroplastic-like; K10525 allene oxide cyclase [EC:5.3.99.6]	Metabolism	Global and Overview;Lipid metabolism	ko01100//Metabolic pathways;ko01110//Biosynthesis of secondary metabolites;ko00592//alpha-Linolenic acid metabolism	K10525	GO:0044424//intracellular part;GO:0043231//intracellular membrane-bounded organelle;GO:0009536//plastid;GO:0043226//organelle;GO:0043227//membrane-bounded organelle;GO:0044444//cytoplasmic part;GO:0005622//intracellular;GO:0005737//cytoplasm;GO:0043229//intracellular organelle;GO:0044464//cell part;GO:0005623//cell	GO:0003824//catalytic activity;GO:0009975//cyclase activity	-
Gene004650	CIL0143S0025	Isoform010265	CIL0143S0025	known	At1g22440	PREDICTED: alcohol dehydrogenase-like 2 isoform X1 [Juglans regia]	Metabolism	Global and Overview;Carbohydrate metabolism;Lipid metabolism;Amino acid metabolism	ko01100//Metabolic pathways;ko01110//Biosynthesis of secondary metabolites;ko01200//Carbon metabolism;ko00010//Glycolysis / Gluconeogenesis;ko00071//Fatty acid degradation;ko00350//Tyrosine metabolism	K00121	-	GO:0005488//binding;GO:0003824//catalytic activity;GO:0043167//ion binding;GO:0043169//cation binding	GO:0008152//metabolic process;GO:0044710//single-organism metabolic process;GO:0044699//single-organism process
Gene013094	CIL0098S0006	Isoform029129	CIL0098S0006	new	At1g62640	3-oxoacyl-[acyl-carrier-protein] synthase 3 A, chloroplastic; K00648 3-oxoacyl-[acyl-carrier-protein] synthase III [EC:2.3.1.180]	Metabolism	Global and Overview;Lipid metabolism	ko01100//Metabolic pathways;ko01212//Fatty acid metabolism;ko00061//Fatty acid biosynthesis	K00648	-	-	-
Gene008379	CIL0937S0060	Isoform018474	CIL0937S0060	new	At1g74320	probable choline kinase 2; K14156 choline/ethanolamine kinase [EC:2.7.1.32 2.7.1.82]	Metabolism	Global and Overview;Lipid metabolism	ko01100//Metabolic pathways;ko00564//Glycerophospholipid metabolism	K14156	-	-	-
Gene008379	CIL0937S0060	Isoform018475	CIL0937S0060	new	At1g74320	probable choline kinase 2; K14156 choline/ethanolamine kinase [EC:2.7.1.32 2.7.1.82]	Metabolism	Lipid metabolism;Global and Overview	ko01100//Metabolic pathways;ko00564//Glycerophospholipid metabolism	K14156	-	-	-
Gene016541	CIL1246S0057	Isoform037166	CIL1246S0057	new	At1g78690	N-acylphosphatidylethanolamine synthase-like; K13511 monolysocardiolipin acyltransferase [EC:2.3.1.-]	Metabolism	Lipid metabolism	ko00564//Glycerophospholipid metabolism	K13511	GO:0031224//intrinsic component of membrane;GO:0044425//membrane part;GO:0016020//membrane	GO:0003824//catalytic activity;GO:0016740//transferase activity	GO:0006793//phosphorus metabolic process;GO:0006650//glycerophospholipid metabolic process;GO:0044237//cellular metabolic process;GO:0071704//organic substance metabolic process;GO:0008152//metabolic process;GO:0006796//phosphate-containing compound metabolic process;GO:0019637//organophosphate metabolic process;GO:0044710//single-organism metabolic process;GO:0006629//lipid metabolic process;GO:…
Gene006449	CIL0064S0014	Isoform014085	CIL0064S0014	new	At2g38010	Neutral/alkaline non-lysosomal ceramidase isoform 1; K12349 neutral ceramidase [EC:3.5.1.23]	Metabolism	Lipid metabolism;Global and Overview	ko01100//Metabolic pathways;ko00600//Sphingolipid metabolism	K12349	-	-	-
Gene008989	CIL0951S0062	Isoform019836	CIL0951S0062	new	At2g38010	Neutral/alkaline non-lysosomal ceramidase isoform 1; K12349 neutral ceramidase [EC:3.5.1.23]	Metabolism	Global and Overview;Lipid metabolism	ko01100//Metabolic pathways;ko00600//Sphingolipid metabolism	K12349	-	-	-
Gene010711	CIL1020S0063,CIL1020S0065,CIL1020S0067,CIL1020S0068,CIL1020S0070,CIL1020S0071,CIL1020S0072,CIL1020S0073,CIL1020S0074	Isoform023863	CIL1020S0070	new	At2g38010	neutral ceramidase; K12349 neutral ceramidase [EC:3.5.1.23]	Metabolism	Lipid metabolism;Global and Overview	ko01100//Metabolic pathways;ko00600//Sphingolipid metabolism	K12349	-	-	-
Gene000888	CIL1305S0061	Isoform001841	CIL1305S0061	known	At3g45770	PREDICTED: probable trans-2-enoyl-CoA reductase, mitochondrial isoform X1 [Juglans regia]	Metabolism	Global and Overview;Lipid metabolism	ko01100//Metabolic pathways;ko01212//Fatty acid metabolism;ko00062//Fatty acid elongation	K07512	GO:0005737//cytoplasm;GO:0005623//cell;GO:0043231//intracellular membrane-bounded organelle;GO:0005622//intracellular;GO:0043227//membrane-bounded organelle;GO:0044464//cell part;GO:0043226//organelle;GO:0044444//cytoplasmic part;GO:0043229//intracellular organelle;GO:0044424//intracellular part;GO:0009536//plastid	GO:0016491//oxidoreductase activity;GO:0016628//oxidoreductase activity, acting on the CH-CH group of donors, NAD or NADP as acceptor;GO:0032549//ribonucleoside binding;GO:0036094//small molecule binding;GO:0016627//oxidoreductase activity, acting on the CH-CH group of donors;GO:0005488//binding;GO:0032550//purine ribonucleoside binding;GO:0046872//metal ion binding;GO:0043167//ion binding;GO:004…	GO:0071704//organic substance metabolic process;GO:0044281//small molecule metabolic process;GO:0044237//cellular metabolic process;GO:0032787//monocarboxylic acid metabolic process;GO:0044238//primary metabolic process;GO:0044710//single-organism metabolic process;GO:0006631//fatty acid metabolic process;GO:0009987//cellular process;GO:0043436//oxoacid metabolic process;GO:0019752//carboxylic ac…
Gene000888	CIL1305S0061	Isoform001842	CIL1305S0061	new	At3g45770	Polyketide synthase, enoylreductase family protein isoform 1; K07512 mitochondrial trans-2-enoyl-CoA reductase [EC:1.3.1.38]	Metabolism	Global and Overview;Lipid metabolism	ko01100//Metabolic pathways;ko01212//Fatty acid metabolism;ko00062//Fatty acid elongation	K07512	GO:0044444//cytoplasmic part;GO:0043226//organelle;GO:0043227//membrane-bounded organelle;GO:0044424//intracellular part;GO:0005622//intracellular;GO:0005623//cell;GO:0009536//plastid;GO:0005737//cytoplasm;GO:0043229//intracellular organelle;GO:0043231//intracellular membrane-bounded organelle;GO:0044464//cell part	GO:0001883//purine nucleoside binding;GO:1901363//heterocyclic compound binding;GO:0003824//catalytic activity;GO:0016491//oxidoreductase activity;GO:0043169//cation binding;GO:0046872//metal ion binding;GO:0046914//transition metal ion binding;GO:0016628//oxidoreductase activity, acting on the CH-CH group of donors, NAD or NADP as acceptor;GO:0036094//small molecule binding;GO:0097159//organic c…	GO:0071704//organic substance metabolic process;GO:0044710//single-organism metabolic process;GO:0006629//lipid metabolic process;GO:0044238//primary metabolic process;GO:0044699//single-organism process;GO:0006082//organic acid metabolic process;GO:0019752//carboxylic acid metabolic process;GO:0006631//fatty acid metabolic process;GO:0008152//metabolic process;GO:0044763//single-organism cellula…
Gene000888	CIL1305S0061	Isoform001843	CIL1305S0061	new	At3g45770	Polyketide synthase, enoylreductase family protein isoform 1; K07512 mitochondrial trans-2-enoyl-CoA reductase [EC:1.3.1.38]	Metabolism	Global and Overview;Lipid metabolism	ko01100//Metabolic pathways;ko01212//Fatty acid metabolism;ko00062//Fatty acid elongation	K07512	GO:0005622//intracellular;GO:0043226//organelle;GO:0044464//cell part;GO:0043229//intracellular organelle;GO:0043231//intracellular membrane-bounded organelle;GO:0043227//membrane-bounded organelle;GO:0005737//cytoplasm;GO:0009536//plastid;GO:0044424//intracellular part;GO:0044444//cytoplasmic part;GO:0005623//cell	GO:0005488//binding;GO:1901363//heterocyclic compound binding;GO:0032549//ribonucleoside binding;GO:0043169//cation binding;GO:0032550//purine ribonucleoside binding;GO:0016627//oxidoreductase activity, acting on the CH-CH group of donors;GO:0001883//purine nucleoside binding;GO:0046914//transition metal ion binding;GO:0016491//oxidoreductase activity;GO:0036094//small molecule binding;GO:0003824…	GO:0071704//organic substance metabolic process;GO:0044710//single-organism metabolic process;GO:0008152//metabolic process;GO:0044281//small molecule metabolic process;GO:0006082//organic acid metabolic process;GO:0044763//single-organism cellular process;GO:0006631//fatty acid metabolic process;GO:0044237//cellular metabolic process;GO:0044238//primary metabolic process;GO:0044699//single-organ…
Gene006814	CIL0893S0426,CIL0893S0427	Isoform014903	CIL0893S0426	new	At4g04930	sphingolipid delta(4)-desaturase DES1; K04712 sphingolipid delta-4 desaturase [EC:1.14.-.-]	Metabolism	Lipid metabolism;Global and Overview	ko01100//Metabolic pathways;ko00600//Sphingolipid metabolism	K04712	GO:0016020//membrane;GO:0031224//intrinsic component of membrane;GO:0044425//membrane part	GO:0016705//oxidoreductase activity, acting on paired donors, with incorporation or reduction of molecular oxygen;GO:0003824//catalytic activity;GO:0016491//oxidoreductase activity	GO:0048869//cellular developmental process;GO:0071840//cellular component organization or biogenesis;GO:0044237//cellular metabolic process;GO:0045229//external encapsulating structure organization;GO:0006807//nitrogen compound metabolic process;GO:0071704//organic substance metabolic process;GO:0044238//primary metabolic process;GO:0044710//single-organism metabolic process;GO:0044255//cellular …
Gene004362	CIL1555S0020	Isoform009500	CIL1555S0020	known	At4g22300	PREDICTED: probable carboxylesterase SOBER1-like [Juglans regia]	Metabolism	Lipid metabolism	ko00564//Glycerophospholipid metabolism	K06130	-	GO:0003824//catalytic activity	-
Gene004362	CIL1555S0020	Isoform009503	CIL1555S0020	new	At4g22300	Carboxylesterases; K06130 lysophospholipase II [EC:3.1.1.5]	Metabolism	Lipid metabolism	ko00564//Glycerophospholipid metabolism	K06130	-	GO:0016788//hydrolase activity, acting on ester bonds;GO:0003824//catalytic activity;GO:0016787//hydrolase activity	-
Gene004362	CIL1555S0020	Isoform009504	CIL1555S0020	new	At4g22300	uncharacterized LOC100854352; K06130 lysophospholipase II [EC:3.1.1.5]	Metabolism	Lipid metabolism	ko00564//Glycerophospholipid metabolism	K06130	-	-	-
Gene011778	CIL1057S0094	Isoform026221	CIL1057S0094	new	At5g47720	acetyl-CoA acetyltransferase, cytosolic 1; K00626 acetyl-CoA C-acetyltransferase [EC:2.3.1.9]	Metabolism	Global and Overview;Carbohydrate metabolism;Amino acid metabolism;Metabolism of terpenoids and polyketides;Lipid metabolism	ko01100//Metabolic pathways;ko01110//Biosynthesis of secondary metabolites;ko01130//Biosynthesis of antibiotics;ko01120//Microbial metabolism in diverse environments;ko01200//Carbon metabolism;ko00620//Pyruvate metabolism;ko01212//Fatty acid metabolism;ko00630//Glyoxylate and dicarboxylate metabolism;ko00071//Fatty acid degradation;ko00280//Valine, leucine and isoleucine degradation;ko00640//Prop…	K00626	-	GO:0016746//transferase activity, transferring acyl groups;GO:0016408//C-acyltransferase activity;GO:0016740//transferase activity;GO:0003988//acetyl-CoA C-acyltransferase activity;GO:0016747//transferase activity, transferring acyl groups other than amino-acyl groups;GO:0003824//catalytic activity	-
Gene000110	CIL0013S0013	Isoform000238	CIL0013S0013	new	BCCP1	biotin carboxyl carrier protein of acetyl-CoA carboxylase, chloroplastic; K02160 acetyl-CoA carboxylase biotin carboxyl carrier protein	Metabolism	Carbohydrate metabolism;Lipid metabolism;Global and Overview	ko01100//Metabolic pathways;ko01110//Biosynthesis of secondary metabolites;ko01130//Biosynthesis of antibiotics;ko01120//Microbial metabolism in diverse environments;ko01200//Carbon metabolism;ko00620//Pyruvate metabolism;ko01212//Fatty acid metabolism;ko00061//Fatty acid biosynthesis;ko00640//Propanoate metabolism	K02160	GO:0043226//organelle;GO:0044424//intracellular part;GO:0009536//plastid;GO:0043231//intracellular membrane-bounded organelle;GO:0043227//membrane-bounded organelle;GO:0043229//intracellular organelle;GO:0005623//cell;GO:0044435//plastid part;GO:0044422//organelle part;GO:0005622//intracellular;GO:0044464//cell part;GO:0044444//cytoplasmic part;GO:0044446//intracellular organelle part;GO:0005737/…	-	GO:1901362//organic cyclic compound biosynthetic process;GO:0044238//primary metabolic process;GO:0032502//developmental process;GO:0048589//developmental growth;GO:0044255//cellular lipid metabolic process;GO:0006694//steroid biosynthetic process;GO:0009653//anatomical structure morphogenesis;GO:0060560//developmental growth involved in morphogenesis;GO:0045229//external encapsulating structure …
Gene000110	CIL0013S0013	Isoform000239	CIL0013S0013	known	BCCP1	PREDICTED: biotin carboxyl carrier protein of acetyl-CoA carboxylase 1, chloroplastic isoform X1 [Jatropha curcas]	Metabolism	Global and Overview;Lipid metabolism;Carbohydrate metabolism	ko01100//Metabolic pathways;ko01110//Biosynthesis of secondary metabolites;ko01200//Carbon metabolism;ko00620//Pyruvate metabolism;ko01212//Fatty acid metabolism;ko00061//Fatty acid biosynthesis;ko00640//Propanoate metabolism	K02160	GO:0044435//plastid part;GO:0044424//intracellular part;GO:0043231//intracellular membrane-bounded organelle;GO:0044464//cell part;GO:0044446//intracellular organelle part;GO:0005737//cytoplasm;GO:0009536//plastid;GO:0043229//intracellular organelle;GO:0043227//membrane-bounded organelle;GO:0005622//intracellular;GO:0043226//organelle;GO:0044444//cytoplasmic part;GO:0044422//organelle part;GO:000…	-	GO:0008610//lipid biosynthetic process;GO:0071840//cellular component organization or biogenesis;GO:0071555//cell wall organization;GO:0048731//system development;GO:1901360//organic cyclic compound metabolic process;GO:0009653//anatomical structure morphogenesis;GO:1901576//organic substance biosynthetic process;GO:0044237//cellular metabolic process;GO:0006694//steroid biosynthetic process;GO:0…
Gene000110	CIL0013S0013	Isoform000240	CIL0013S0013	new	BCCP1	biotin carboxyl carrier protein of acetyl-CoA carboxylase, chloroplastic; K02160 acetyl-CoA carboxylase biotin carboxyl carrier protein	Metabolism	Global and Overview;Carbohydrate metabolism;Lipid metabolism	ko01100//Metabolic pathways;ko01110//Biosynthesis of secondary metabolites;ko01130//Biosynthesis of antibiotics;ko01120//Microbial metabolism in diverse environments;ko01200//Carbon metabolism;ko00620//Pyruvate metabolism;ko01212//Fatty acid metabolism;ko00061//Fatty acid biosynthesis;ko00640//Propanoate metabolism	K02160	GO:0009536//plastid;GO:0043227//membrane-bounded organelle;GO:0043231//intracellular membrane-bounded organelle;GO:0005622//intracellular;GO:0044424//intracellular part;GO:0043226//organelle;GO:0005737//cytoplasm;GO:0005623//cell;GO:0044444//cytoplasmic part;GO:0044464//cell part;GO:0043229//intracellular organelle	-	GO:0032502//developmental process;GO:0048589//developmental growth;GO:0044237//cellular metabolic process;GO:0048513//animal organ development;GO:0048731//system development;GO:0008610//lipid biosynthetic process;GO:0009058//biosynthetic process;GO:0009987//cellular process;GO:0065007//biological regulation;GO:0040007//growth;GO:0071554//cell wall organization or biogenesis;GO:0048856//anatomical…
Gene000110	CIL0013S0013	Isoform000241	CIL0013S0013	new	BCCP1	biotin carboxyl carrier protein of acetyl-CoA carboxylase, chloroplastic; K02160 acetyl-CoA carboxylase biotin carboxyl carrier protein	Metabolism	Global and Overview;Lipid metabolism;Carbohydrate metabolism	ko01100//Metabolic pathways;ko01110//Biosynthesis of secondary metabolites;ko01130//Biosynthesis of antibiotics;ko01120//Microbial metabolism in diverse environments;ko01200//Carbon metabolism;ko00620//Pyruvate metabolism;ko01212//Fatty acid metabolism;ko00061//Fatty acid biosynthesis;ko00640//Propanoate metabolism	K02160	GO:0005622//intracellular;GO:0005623//cell;GO:0044464//cell part;GO:0044424//intracellular part;GO:0044444//cytoplasmic part;GO:0005737//cytoplasm	-	GO:0006629//lipid metabolic process;GO:0009987//cellular process;GO:0044763//single-organism cellular process;GO:0071704//organic substance metabolic process;GO:0044710//single-organism metabolic process;GO:0044281//small molecule metabolic process;GO:0008152//metabolic process;GO:0044699//single-organism process;GO:0044238//primary metabolic process
Gene000110	CIL0013S0013	Isoform000242	CIL0013S0013	new	BCCP1	biotin carboxyl carrier protein of acetyl-CoA carboxylase, chloroplastic; K02160 acetyl-CoA carboxylase biotin carboxyl carrier protein	Metabolism	Global and Overview;Lipid metabolism;Carbohydrate metabolism	ko01100//Metabolic pathways;ko01110//Biosynthesis of secondary metabolites;ko01130//Biosynthesis of antibiotics;ko01120//Microbial metabolism in diverse environments;ko01200//Carbon metabolism;ko00620//Pyruvate metabolism;ko01212//Fatty acid metabolism;ko00061//Fatty acid biosynthesis;ko00640//Propanoate metabolism	K02160	GO:0009536//plastid;GO:0005737//cytoplasm;GO:0043227//membrane-bounded organelle;GO:0043226//organelle;GO:0005623//cell;GO:0005622//intracellular;GO:0044424//intracellular part;GO:0044464//cell part;GO:0043229//intracellular organelle;GO:0044444//cytoplasmic part;GO:0043231//intracellular membrane-bounded organelle	-	GO:0048856//anatomical structure development;GO:0032501//multicellular organismal process;GO:0006629//lipid metabolic process;GO:0044281//small molecule metabolic process;GO:0044767//single-organism developmental process;GO:0032502//developmental process;GO:0044763//single-organism cellular process;GO:0008152//metabolic process;GO:0071840//cellular component organization or biogenesis;GO:0044707/…
Gene003182	CIL1461S0002	Isoform006945	CIL1461S0002	new	BCCP1	biotin carboxyl carrier protein of acetyl-CoA carboxylase, chloroplastic; K02160 acetyl-CoA carboxylase biotin carboxyl carrier protein	Metabolism	Carbohydrate metabolism;Lipid metabolism;Global and Overview	ko01100//Metabolic pathways;ko01110//Biosynthesis of secondary metabolites;ko01130//Biosynthesis of antibiotics;ko01120//Microbial metabolism in diverse environments;ko01200//Carbon metabolism;ko00620//Pyruvate metabolism;ko01212//Fatty acid metabolism;ko00061//Fatty acid biosynthesis;ko00640//Propanoate metabolism	K02160	-	-	-
Gene003970	CIL1518S0020	Isoform008668	CIL1518S0020	new	BCCP2	biotin carboxyl carrier protein of acetyl-CoA carboxylase 2, chloroplastic; K02160 acetyl-CoA carboxylase biotin carboxyl carrier protein	Metabolism	Carbohydrate metabolism;Lipid metabolism;Global and Overview	ko01100//Metabolic pathways;ko01110//Biosynthesis of secondary metabolites;ko01130//Biosynthesis of antibiotics;ko01120//Microbial metabolism in diverse environments;ko01200//Carbon metabolism;ko00620//Pyruvate metabolism;ko01212//Fatty acid metabolism;ko00061//Fatty acid biosynthesis;ko00640//Propanoate metabolism	K02160	-	-	-
Gene012075	CIL0094S0006	Isoform026821	CIL0094S0006	new	BCCP2	biotin carboxyl carrier protein of acetyl-CoA carboxylase 2, chloroplastic; K02160 acetyl-CoA carboxylase biotin carboxyl carrier protein	Metabolism	Global and Overview;Lipid metabolism;Carbohydrate metabolism	ko01100//Metabolic pathways;ko01110//Biosynthesis of secondary metabolites;ko01130//Biosynthesis of antibiotics;ko01120//Microbial metabolism in diverse environments;ko01200//Carbon metabolism;ko00620//Pyruvate metabolism;ko01212//Fatty acid metabolism;ko00061//Fatty acid biosynthesis;ko00640//Propanoate metabolism	K02160	GO:0005623//cell;GO:0044424//intracellular part;GO:0044464//cell part;GO:0044444//cytoplasmic part;GO:0005737//cytoplasm;GO:0005622//intracellular	-	GO:0019752//carboxylic acid metabolic process;GO:0009987//cellular process;GO:0044255//cellular lipid metabolic process;GO:0044763//single-organism cellular process;GO:0044281//small molecule metabolic process;GO:0044699//single-organism process;GO:0044710//single-organism metabolic process;GO:0032787//monocarboxylic acid metabolic process;GO:0006629//lipid metabolic process;GO:0006631//fatty aci…
Gene001088	CIL1317S0072,CIL1317S0073	Isoform002308	CIL1317S0072	known	BGAL17	Glyco_hydro_35 domain-containing protein [Cephalotus follicularis]	Metabolism	Carbohydrate metabolism;Glycan biosynthesis and metabolism;Lipid metabolism;Global and Overview	ko01100//Metabolic pathways;ko00052//Galactose metabolism;ko00600//Sphingolipid metabolism;ko00511//Other glycan degradation;ko00531//Glycosaminoglycan degradation;ko00604//Glycosphingolipid biosynthesis - ganglio series	K12309	GO:0005576//extracellular region	GO:0005488//binding;GO:0015925//galactosidase activity;GO:0004553//hydrolase activity, hydrolyzing O-glycosyl compounds;GO:0003824//catalytic activity;GO:0043167//ion binding;GO:0043169//cation binding;GO:0016798//hydrolase activity, acting on glycosyl bonds;GO:0016787//hydrolase activity	GO:0044036//cell wall macromolecule metabolic process;GO:0044260//cellular macromolecule metabolic process;GO:0005976//polysaccharide metabolic process;GO:0005975//carbohydrate metabolic process;GO:0043170//macromolecule metabolic process;GO:0044237//cellular metabolic process;GO:0009987//cellular process;GO:0008152//metabolic process;GO:0071554//cell wall organization or biogenesis;GO:0003006//d…
Gene001088	CIL1317S0072,CIL1317S0073	Isoform002313	CIL1317S0072	new	BGAL17	beta-galactosidase 17; K12309 beta-galactosidase [EC:3.2.1.23]	Metabolism	Glycan biosynthesis and metabolism;Carbohydrate metabolism;Lipid metabolism;Global and Overview	ko01100//Metabolic pathways;ko00052//Galactose metabolism;ko00600//Sphingolipid metabolism;ko00511//Other glycan degradation;ko00531//Glycosaminoglycan degradation;ko00604//Glycosphingolipid biosynthesis - ganglio series	K12309	-	-	-
Gene001088	CIL1317S0072,CIL1317S0073	Isoform002314	CIL1317S0072	new	BGAL17	Beta-galactosidase 17; K12309 beta-galactosidase [EC:3.2.1.23]	Metabolism	Lipid metabolism;Carbohydrate metabolism;Glycan biosynthesis and metabolism;Global and Overview	ko01100//Metabolic pathways;ko00052//Galactose metabolism;ko00600//Sphingolipid metabolism;ko00511//Other glycan degradation;ko00531//Glycosaminoglycan degradation;ko00604//Glycosphingolipid biosynthesis - ganglio series	K12309	GO:0005576//extracellular region	GO:0043169//cation binding;GO:0043167//ion binding;GO:0005488//binding;GO:0003824//catalytic activity;GO:0016798//hydrolase activity, acting on glycosyl bonds;GO:0004553//hydrolase activity, hydrolyzing O-glycosyl compounds;GO:0016787//hydrolase activity;GO:0015925//galactosidase activity	GO:0018193//peptidyl-amino acid modification;GO:0022414//reproductive process;GO:0010410//hemicellulose metabolic process;GO:0044036//cell wall macromolecule metabolic process;GO:0003006//developmental process involved in reproduction;GO:0000003//reproduction;GO:0005976//polysaccharide metabolic process;GO:0009987//cellular process;GO:0010383//cell wall polysaccharide metabolic process;GO:0044238…
Gene001088	CIL1317S0072,CIL1317S0073	Isoform002315	CIL1317S0072	new	BGAL17	Beta-galactosidase 17; K12309 beta-galactosidase [EC:3.2.1.23]	Metabolism	Global and Overview;Lipid metabolism;Carbohydrate metabolism;Glycan biosynthesis and metabolism	ko01100//Metabolic pathways;ko00052//Galactose metabolism;ko00600//Sphingolipid metabolism;ko00511//Other glycan degradation;ko00531//Glycosaminoglycan degradation;ko00604//Glycosphingolipid biosynthesis - ganglio series	K12309	GO:0005576//extracellular region	GO:0005488//binding;GO:0043169//cation binding;GO:0016787//hydrolase activity;GO:0016798//hydrolase activity, acting on glycosyl bonds;GO:0003824//catalytic activity;GO:0004553//hydrolase activity, hydrolyzing O-glycosyl compounds;GO:0015925//galactosidase activity;GO:0043167//ion binding	GO:0044237//cellular metabolic process;GO:0043170//macromolecule metabolic process;GO:0032502//developmental process;GO:0018205//peptidyl-lysine modification;GO:0010383//cell wall polysaccharide metabolic process;GO:0006464//cellular protein modification process;GO:0043412//macromolecule modification;GO:0036211//protein modification process;GO:0009987//cellular process;GO:0003006//developmental p…
Gene001088	CIL1317S0072,CIL1317S0073	Isoform002316	CIL1317S0072	new	BGAL17	Beta-galactosidase 17; K12309 beta-galactosidase [EC:3.2.1.23]	Metabolism	Lipid metabolism;Carbohydrate metabolism;Glycan biosynthesis and metabolism;Global and Overview	ko01100//Metabolic pathways;ko00052//Galactose metabolism;ko00600//Sphingolipid metabolism;ko00511//Other glycan degradation;ko00531//Glycosaminoglycan degradation;ko00604//Glycosphingolipid biosynthesis - ganglio series	K12309	GO:0005576//extracellular region	GO:0005488//binding;GO:0043167//ion binding;GO:0043169//cation binding;GO:0015925//galactosidase activity;GO:0004553//hydrolase activity, hydrolyzing O-glycosyl compounds;GO:0016787//hydrolase activity;GO:0016798//hydrolase activity, acting on glycosyl bonds;GO:0003824//catalytic activity	GO:0071704//organic substance metabolic process;GO:0022414//reproductive process;GO:0010410//hemicellulose metabolic process;GO:0008152//metabolic process;GO:0000003//reproduction;GO:0010383//cell wall polysaccharide metabolic process;GO:0005975//carbohydrate metabolic process;GO:0032502//developmental process;GO:0072593//reactive oxygen species metabolic process;GO:0044237//cellular metabolic pr…
Gene001088	CIL1317S0072,CIL1317S0073	Isoform002317	CIL1317S0072	new	BGAL17	Beta-galactosidase 17; K12309 beta-galactosidase [EC:3.2.1.23]	Metabolism	Lipid metabolism;Glycan biosynthesis and metabolism;Carbohydrate metabolism;Global and Overview	ko01100//Metabolic pathways;ko00052//Galactose metabolism;ko00600//Sphingolipid metabolism;ko00511//Other glycan degradation;ko00531//Glycosaminoglycan degradation;ko00604//Glycosphingolipid biosynthesis - ganglio series	K12309	GO:0005576//extracellular region	GO:0043169//cation binding;GO:0003824//catalytic activity;GO:0004553//hydrolase activity, hydrolyzing O-glycosyl compounds;GO:0043167//ion binding;GO:0016798//hydrolase activity, acting on glycosyl bonds;GO:0016787//hydrolase activity;GO:0015925//galactosidase activity;GO:0005488//binding	GO:0005976//polysaccharide metabolic process;GO:0009987//cellular process;GO:0006464//cellular protein modification process;GO:0071554//cell wall organization or biogenesis;GO:0018193//peptidyl-amino acid modification;GO:0044238//primary metabolic process;GO:0036211//protein modification process;GO:0008152//metabolic process;GO:0019538//protein metabolic process;GO:0043412//macromolecule modifica…
Gene001088	CIL1317S0072,CIL1317S0073	Isoform002318	CIL1317S0072,CIL1317S0073	new	BGAL17	Beta-galactosidase 17; K12309 beta-galactosidase [EC:3.2.1.23]	Metabolism	Global and Overview;Lipid metabolism;Glycan biosynthesis and metabolism;Carbohydrate metabolism	ko01100//Metabolic pathways;ko00052//Galactose metabolism;ko00600//Sphingolipid metabolism;ko00511//Other glycan degradation;ko00531//Glycosaminoglycan degradation;ko00604//Glycosphingolipid biosynthesis - ganglio series	K12309	GO:0005576//extracellular region	GO:0004553//hydrolase activity, hydrolyzing O-glycosyl compounds;GO:0016798//hydrolase activity, acting on glycosyl bonds;GO:0015925//galactosidase activity;GO:0016787//hydrolase activity;GO:0005488//binding;GO:0043167//ion binding;GO:0003824//catalytic activity;GO:0043169//cation binding	GO:0044036//cell wall macromolecule metabolic process;GO:0008152//metabolic process;GO:0072593//reactive oxygen species metabolic process;GO:0005975//carbohydrate metabolic process;GO:0071554//cell wall organization or biogenesis;GO:0006464//cellular protein modification process;GO:0018205//peptidyl-lysine modification;GO:0019538//protein metabolic process;GO:0043412//macromolecule modification;G…
Gene010712	CIL1020S0079	Isoform023869	CIL1020S0079	new	CAC3	acetyl-coenzyme A carboxylase carboxyl transferase subunit alpha, chloroplastic; K01962 acetyl-CoA carboxylase carboxyl transferase subunit alpha [EC:6.4.1.2]	Metabolism	Lipid metabolism;Carbohydrate metabolism;Global and Overview	ko01100//Metabolic pathways;ko01110//Biosynthesis of secondary metabolites;ko01130//Biosynthesis of antibiotics;ko01120//Microbial metabolism in diverse environments;ko01200//Carbon metabolism;ko00620//Pyruvate metabolism;ko01212//Fatty acid metabolism;ko00061//Fatty acid biosynthesis;ko00640//Propanoate metabolism	K01962	GO:0005737//cytoplasm;GO:0043229//intracellular organelle;GO:0044424//intracellular part;GO:0031967//organelle envelope;GO:0031975//envelope;GO:0009526//plastid envelope;GO:0043227//membrane-bounded organelle;GO:0016020//membrane;GO:0009532//plastid stroma;GO:0009536//plastid;GO:0042170//plastid membrane;GO:0009528//plastid inner membrane;GO:0019866//organelle inner membrane;GO:0043231//intracell…	GO:0032550//purine ribonucleoside binding;GO:0003824//catalytic activity;GO:1901363//heterocyclic compound binding;GO:0005488//binding;GO:0032549//ribonucleoside binding;GO:0016885//ligase activity, forming carbon-carbon bonds;GO:0001883//purine nucleoside binding;GO:0001882//nucleoside binding;GO:0097367//carbohydrate derivative binding;GO:0016421//CoA carboxylase activity;GO:0036094//small mole…	GO:0009259//ribonucleotide metabolic process;GO:0009117//nucleotide metabolic process;GO:0009165//nucleotide biosynthetic process;GO:0072522//purine-containing compound biosynthetic process;GO:0006629//lipid metabolic process;GO:0019438//aromatic compound biosynthetic process;GO:1901293//nucleoside phosphate biosynthetic process;GO:1901576//organic substance biosynthetic process;GO:0034032//purin…
Gene010712	CIL1020S0079	Isoform023870	CIL1020S0079	new	CAC3	acetyl-coenzyme A carboxylase carboxyl transferase subunit alpha, chloroplastic; K01962 acetyl-CoA carboxylase carboxyl transferase subunit alpha [EC:6.4.1.2]	Metabolism	Global and Overview;Carbohydrate metabolism;Lipid metabolism	ko01100//Metabolic pathways;ko01110//Biosynthesis of secondary metabolites;ko01130//Biosynthesis of antibiotics;ko01120//Microbial metabolism in diverse environments;ko01200//Carbon metabolism;ko00620//Pyruvate metabolism;ko01212//Fatty acid metabolism;ko00061//Fatty acid biosynthesis;ko00640//Propanoate metabolism	K01962	GO:0031090//organelle membrane;GO:0031967//organelle envelope;GO:0044435//plastid part;GO:0044464//cell part;GO:0019866//organelle inner membrane;GO:0043226//organelle;GO:0009528//plastid inner membrane;GO:0009526//plastid envelope;GO:0005623//cell;GO:0016020//membrane;GO:0031975//envelope;GO:0044444//cytoplasmic part;GO:0043229//intracellular organelle;GO:0044422//organelle part;GO:0009532//plas…	GO:0032550//purine ribonucleoside binding;GO:0036094//small molecule binding;GO:0032549//ribonucleoside binding;GO:0016421//CoA carboxylase activity;GO:0016885//ligase activity, forming carbon-carbon bonds;GO:0097159//organic cyclic compound binding;GO:0097367//carbohydrate derivative binding;GO:0001883//purine nucleoside binding;GO:0001882//nucleoside binding;GO:1901363//heterocyclic compound bi…	GO:0006164//purine nucleotide biosynthetic process;GO:0006796//phosphate-containing compound metabolic process;GO:0051188//cofactor biosynthetic process;GO:0044711//single-organism biosynthetic process;GO:0019438//aromatic compound biosynthetic process;GO:0042451//purine nucleoside biosynthetic process;GO:0006753//nucleoside phosphate metabolic process;GO:0043436//oxoacid metabolic process;GO:007…
Gene010712	CIL1020S0079	Isoform023871	CIL1020S0079	new	CAC3	acetyl-coenzyme A carboxylase carboxyl transferase subunit alpha, chloroplastic; K01962 acetyl-CoA carboxylase carboxyl transferase subunit alpha [EC:6.4.1.2]	Metabolism	Lipid metabolism;Carbohydrate metabolism;Global and Overview	ko01100//Metabolic pathways;ko01110//Biosynthesis of secondary metabolites;ko01130//Biosynthesis of antibiotics;ko01120//Microbial metabolism in diverse environments;ko01200//Carbon metabolism;ko00620//Pyruvate metabolism;ko01212//Fatty acid metabolism;ko00061//Fatty acid biosynthesis;ko00640//Propanoate metabolism	K01962	GO:0044446//intracellular organelle part;GO:0044435//plastid part;GO:0005623//cell;GO:0043227//membrane-bounded organelle;GO:0044422//organelle part;GO:0044464//cell part;GO:0031090//organelle membrane;GO:0043226//organelle;GO:0009528//plastid inner membrane;GO:0031975//envelope;GO:0005622//intracellular;GO:0044444//cytoplasmic part;GO:0043229//intracellular organelle;GO:0044424//intracellular pa…	GO:0016874//ligase activity;GO:0005488//binding;GO:0036094//small molecule binding;GO:0001883//purine nucleoside binding;GO:0032550//purine ribonucleoside binding;GO:0003824//catalytic activity;GO:0032549//ribonucleoside binding;GO:0097367//carbohydrate derivative binding;GO:0097159//organic cyclic compound binding;GO:1901363//heterocyclic compound binding;GO:0001882//nucleoside binding;GO:001688…	GO:0044699//single-organism process;GO:0009152//purine ribonucleotide biosynthetic process;GO:0090407//organophosphate biosynthetic process;GO:1901362//organic cyclic compound biosynthetic process;GO:0009119//ribonucleoside metabolic process;GO:0006629//lipid metabolic process;GO:0006163//purine nucleotide metabolic process;GO:0015936//coenzyme A metabolic process;GO:0044711//single-organism bios…
Gene010712	CIL1020S0079	Isoform023872	CIL1020S0079	new	CAC3	acetyl-coenzyme A carboxylase carboxyl transferase subunit alpha, chloroplastic; K01962 acetyl-CoA carboxylase carboxyl transferase subunit alpha [EC:6.4.1.2]	Metabolism	Carbohydrate metabolism;Lipid metabolism;Global and Overview	ko01100//Metabolic pathways;ko01110//Biosynthesis of secondary metabolites;ko01130//Biosynthesis of antibiotics;ko01120//Microbial metabolism in diverse environments;ko01200//Carbon metabolism;ko00620//Pyruvate metabolism;ko01212//Fatty acid metabolism;ko00061//Fatty acid biosynthesis;ko00640//Propanoate metabolism	K01962	GO:0042170//plastid membrane;GO:0031090//organelle membrane;GO:0044446//intracellular organelle part;GO:0009536//plastid;GO:0009526//plastid envelope;GO:0005737//cytoplasm;GO:0044444//cytoplasmic part;GO:0044464//cell part;GO:0009528//plastid inner membrane;GO:0016020//membrane;GO:0031967//organelle envelope;GO:0044422//organelle part;GO:0044424//intracellular part;GO:0044435//plastid part;GO:000…	GO:0036094//small molecule binding;GO:0016421//CoA carboxylase activity;GO:0001883//purine nucleoside binding;GO:0016874//ligase activity;GO:0097367//carbohydrate derivative binding;GO:0005488//binding;GO:0032550//purine ribonucleoside binding;GO:0032549//ribonucleoside binding;GO:0003824//catalytic activity;GO:0001882//nucleoside binding;GO:1901363//heterocyclic compound binding;GO:0016885//liga…	GO:0009119//ribonucleoside metabolic process;GO:0071704//organic substance metabolic process;GO:0034030//ribonucleoside bisphosphate biosynthetic process;GO:0019637//organophosphate metabolic process;GO:0006733//oxidoreduction coenzyme metabolic process;GO:0051188//cofactor biosynthetic process;GO:0042451//purine nucleoside biosynthetic process;GO:0009259//ribonucleotide metabolic process;GO:1901…
Gene010712	CIL1020S0079	Isoform023873	CIL1020S0079	new	CAC3	acetyl-coenzyme A carboxylase carboxyl transferase subunit alpha, chloroplastic-like; K01962 acetyl-CoA carboxylase carboxyl transferase subunit alpha [EC:6.4.1.2]	Metabolism	Lipid metabolism;Carbohydrate metabolism;Global and Overview	ko01100//Metabolic pathways;ko01110//Biosynthesis of secondary metabolites;ko01130//Biosynthesis of antibiotics;ko01120//Microbial metabolism in diverse environments;ko01200//Carbon metabolism;ko00620//Pyruvate metabolism;ko01212//Fatty acid metabolism;ko00061//Fatty acid biosynthesis;ko00640//Propanoate metabolism	K01962	GO:0031975//envelope;GO:0044424//intracellular part;GO:0005622//intracellular;GO:0044435//plastid part;GO:0044444//cytoplasmic part;GO:0031967//organelle envelope;GO:0019866//organelle inner membrane;GO:0009532//plastid stroma;GO:0009536//plastid;GO:0009528//plastid inner membrane;GO:0044446//intracellular organelle part;GO:0043231//intracellular membrane-bounded organelle;GO:0042170//plastid mem…	GO:0016874//ligase activity;GO:0003824//catalytic activity;GO:0036094//small molecule binding;GO:0097367//carbohydrate derivative binding;GO:0001882//nucleoside binding;GO:0016421//CoA carboxylase activity;GO:0005488//binding;GO:0032550//purine ribonucleoside binding;GO:0001883//purine nucleoside binding;GO:0016885//ligase activity, forming carbon-carbon bonds;GO:0032549//ribonucleoside binding;G…	GO:1901360//organic cyclic compound metabolic process;GO:1901566//organonitrogen compound biosynthetic process;GO:0008152//metabolic process;GO:0072522//purine-containing compound biosynthetic process;GO:0009259//ribonucleotide metabolic process;GO:1901576//organic substance biosynthetic process;GO:1901137//carbohydrate derivative biosynthetic process;GO:0015937//coenzyme A biosynthetic process;G…
Gene010712	CIL1020S0079	Isoform023874	CIL1020S0079	new	CAC3	acetyl-coenzyme A carboxylase carboxyl transferase subunit alpha, chloroplastic; K01962 acetyl-CoA carboxylase carboxyl transferase subunit alpha [EC:6.4.1.2]	Metabolism	Lipid metabolism;Carbohydrate metabolism;Global and Overview	ko01100//Metabolic pathways;ko01110//Biosynthesis of secondary metabolites;ko01130//Biosynthesis of antibiotics;ko01120//Microbial metabolism in diverse environments;ko01200//Carbon metabolism;ko00620//Pyruvate metabolism;ko01212//Fatty acid metabolism;ko00061//Fatty acid biosynthesis;ko00640//Propanoate metabolism	K01962	GO:0043229//intracellular organelle;GO:0031975//envelope;GO:0044464//cell part;GO:0009528//plastid inner membrane;GO:0031090//organelle membrane;GO:0009532//plastid stroma;GO:0043231//intracellular membrane-bounded organelle;GO:0043227//membrane-bounded organelle;GO:0009526//plastid envelope;GO:0042170//plastid membrane;GO:0044424//intracellular part;GO:0044446//intracellular organelle part;GO:00…	GO:0032550//purine ribonucleoside binding;GO:0032549//ribonucleoside binding;GO:0016421//CoA carboxylase activity;GO:0016874//ligase activity;GO:0005488//binding;GO:0016885//ligase activity, forming carbon-carbon bonds;GO:0001883//purine nucleoside binding;GO:0001882//nucleoside binding;GO:0097367//carbohydrate derivative binding;GO:0036094//small molecule binding;GO:0097159//organic cyclic compo…	GO:0046129//purine ribonucleoside biosynthetic process;GO:0046483//heterocycle metabolic process;GO:0009108//coenzyme biosynthetic process;GO:0009259//ribonucleotide metabolic process;GO:0006793//phosphorus metabolic process;GO:0044249//cellular biosynthetic process;GO:0034033//purine nucleoside bisphosphate biosynthetic process;GO:0006743//ubiquinone metabolic process;GO:0019438//aromatic compou…
Gene010712	CIL1020S0079	Isoform023876	CIL1020S0079	new	CAC3	acetyl-coenzyme A carboxylase carboxyl transferase subunit alpha, chloroplastic; K01962 acetyl-CoA carboxylase carboxyl transferase subunit alpha [EC:6.4.1.2]	Metabolism	Global and Overview;Lipid metabolism;Carbohydrate metabolism	ko01100//Metabolic pathways;ko01110//Biosynthesis of secondary metabolites;ko01130//Biosynthesis of antibiotics;ko01120//Microbial metabolism in diverse environments;ko01200//Carbon metabolism;ko00620//Pyruvate metabolism;ko01212//Fatty acid metabolism;ko00061//Fatty acid biosynthesis;ko00640//Propanoate metabolism	K01962	GO:0009528//plastid inner membrane;GO:0044446//intracellular organelle part;GO:0016020//membrane;GO:0042170//plastid membrane;GO:0005623//cell;GO:0031967//organelle envelope;GO:0043231//intracellular membrane-bounded organelle;GO:0009532//plastid stroma;GO:0009526//plastid envelope;GO:0031090//organelle membrane;GO:0009536//plastid;GO:0044464//cell part;GO:0043229//intracellular organelle;GO:0005…	GO:0016874//ligase activity;GO:0097367//carbohydrate derivative binding;GO:1901363//heterocyclic compound binding;GO:0016885//ligase activity, forming carbon-carbon bonds;GO:0097159//organic cyclic compound binding;GO:0001882//nucleoside binding;GO:0032549//ribonucleoside binding;GO:0032550//purine ribonucleoside binding;GO:0005488//binding;GO:0036094//small molecule binding;GO:0001883//purine nu…	GO:0009987//cellular process;GO:0044710//single-organism metabolic process;GO:0019693//ribose phosphate metabolic process;GO:1901137//carbohydrate derivative biosynthetic process;GO:0006743//ubiquinone metabolic process;GO:0042278//purine nucleoside metabolic process;GO:0033865//nucleoside bisphosphate metabolic process;GO:0009119//ribonucleoside metabolic process;GO:0009165//nucleotide biosynthe…
Gene010712	CIL1020S0079	Isoform023877	CIL1020S0079	new	CAC3	acetyl-coenzyme A carboxylase carboxyl transferase subunit alpha, chloroplastic; K01962 acetyl-CoA carboxylase carboxyl transferase subunit alpha [EC:6.4.1.2]	Metabolism	Global and Overview;Carbohydrate metabolism;Lipid metabolism	ko01100//Metabolic pathways;ko01110//Biosynthesis of secondary metabolites;ko01130//Biosynthesis of antibiotics;ko01120//Microbial metabolism in diverse environments;ko01200//Carbon metabolism;ko00620//Pyruvate metabolism;ko01212//Fatty acid metabolism;ko00061//Fatty acid biosynthesis;ko00640//Propanoate metabolism	K01962	GO:0009528//plastid inner membrane;GO:0043229//intracellular organelle;GO:0044422//organelle part;GO:0031090//organelle membrane;GO:0009532//plastid stroma;GO:0009526//plastid envelope;GO:0044424//intracellular part;GO:0042170//plastid membrane;GO:0043231//intracellular membrane-bounded organelle;GO:0044435//plastid part;GO:0043226//organelle;GO:0005737//cytoplasm;GO:0016020//membrane;GO:0005622/…	GO:0001882//nucleoside binding;GO:0003824//catalytic activity;GO:0032550//purine ribonucleoside binding;GO:0016885//ligase activity, forming carbon-carbon bonds;GO:0016421//CoA carboxylase activity;GO:0005488//binding;GO:0097367//carbohydrate derivative binding;GO:0016874//ligase activity;GO:0097159//organic cyclic compound binding;GO:0036094//small molecule binding;GO:0032549//ribonucleoside bin…	GO:0044699//single-organism process;GO:0044281//small molecule metabolic process;GO:0044711//single-organism biosynthetic process;GO:1901576//organic substance biosynthetic process;GO:0072521//purine-containing compound metabolic process;GO:0015936//coenzyme A metabolic process;GO:0044238//primary metabolic process;GO:1901659//glycosyl compound biosynthetic process;GO:0034032//purine nucleoside b…
Gene010712	CIL1020S0079	Isoform023878	CIL1020S0079	new	CAC3	acetyl-coenzyme A carboxylase carboxyl transferase subunit alpha, chloroplastic; K01962 acetyl-CoA carboxylase carboxyl transferase subunit alpha [EC:6.4.1.2]	Metabolism	Lipid metabolism;Carbohydrate metabolism;Global and Overview	ko01100//Metabolic pathways;ko01110//Biosynthesis of secondary metabolites;ko01130//Biosynthesis of antibiotics;ko01120//Microbial metabolism in diverse environments;ko01200//Carbon metabolism;ko00620//Pyruvate metabolism;ko01212//Fatty acid metabolism;ko00061//Fatty acid biosynthesis;ko00640//Propanoate metabolism	K01962	GO:0005623//cell;GO:0009536//plastid;GO:0005737//cytoplasm;GO:0031090//organelle membrane;GO:0044444//cytoplasmic part;GO:0042170//plastid membrane;GO:0044435//plastid part;GO:0009528//plastid inner membrane;GO:0031975//envelope;GO:0016020//membrane;GO:0005622//intracellular;GO:0044446//intracellular organelle part;GO:0044422//organelle part;GO:0031967//organelle envelope;GO:0009532//plastid stro…	GO:0005488//binding;GO:0016874//ligase activity;GO:0003824//catalytic activity;GO:0097159//organic cyclic compound binding;GO:0032550//purine ribonucleoside binding;GO:0097367//carbohydrate derivative binding;GO:0036094//small molecule binding;GO:0001882//nucleoside binding;GO:0016421//CoA carboxylase activity;GO:0016885//ligase activity, forming carbon-carbon bonds;GO:0001883//purine nucleoside …	GO:1901564//organonitrogen compound metabolic process;GO:0019752//carboxylic acid metabolic process;GO:0042180//cellular ketone metabolic process;GO:0009165//nucleotide biosynthetic process;GO:0044763//single-organism cellular process;GO:0055086//nucleobase-containing small molecule metabolic process;GO:0006743//ubiquinone metabolic process;GO:0072521//purine-containing compound metabolic process…
Gene010712	CIL1020S0079	Isoform023879	CIL1020S0079	new	CAC3	acetyl-coenzyme A carboxylase carboxyl transferase subunit alpha, chloroplastic; K01962 acetyl-CoA carboxylase carboxyl transferase subunit alpha [EC:6.4.1.2]	Metabolism	Global and Overview;Lipid metabolism;Carbohydrate metabolism	ko01100//Metabolic pathways;ko01110//Biosynthesis of secondary metabolites;ko01130//Biosynthesis of antibiotics;ko01120//Microbial metabolism in diverse environments;ko01200//Carbon metabolism;ko00620//Pyruvate metabolism;ko01212//Fatty acid metabolism;ko00061//Fatty acid biosynthesis;ko00640//Propanoate metabolism	K01962	GO:0044422//organelle part;GO:0009528//plastid inner membrane;GO:0016020//membrane;GO:0044444//cytoplasmic part;GO:0019866//organelle inner membrane;GO:0044446//intracellular organelle part;GO:0043231//intracellular membrane-bounded organelle;GO:0009526//plastid envelope;GO:0043229//intracellular organelle;GO:0044435//plastid part;GO:0009536//plastid;GO:0043226//organelle;GO:0044424//intracellula…	GO:0016874//ligase activity;GO:0005488//binding;GO:0036094//small molecule binding;GO:1901363//heterocyclic compound binding;GO:0001882//nucleoside binding;GO:0016885//ligase activity, forming carbon-carbon bonds;GO:0097367//carbohydrate derivative binding;GO:0032549//ribonucleoside binding;GO:0001883//purine nucleoside binding;GO:0097159//organic cyclic compound binding;GO:0016421//CoA carboxyla…	GO:1901293//nucleoside phosphate biosynthetic process;GO:0034033//purine nucleoside bisphosphate biosynthetic process;GO:0006807//nitrogen compound metabolic process;GO:0044711//single-organism biosynthetic process;GO:0044249//cellular biosynthetic process;GO:1901360//organic cyclic compound metabolic process;GO:0009259//ribonucleotide metabolic process;GO:0033875//ribonucleoside bisphosphate met…
Gene010712	CIL1020S0079	Isoform023880	CIL1020S0079	new	CAC3	acetyl-coenzyme A carboxylase carboxyl transferase subunit alpha, chloroplastic; K01962 acetyl-CoA carboxylase carboxyl transferase subunit alpha [EC:6.4.1.2]	Metabolism	Lipid metabolism;Carbohydrate metabolism;Global and Overview	ko01100//Metabolic pathways;ko01110//Biosynthesis of secondary metabolites;ko01130//Biosynthesis of antibiotics;ko01120//Microbial metabolism in diverse environments;ko01200//Carbon metabolism;ko00620//Pyruvate metabolism;ko01212//Fatty acid metabolism;ko00061//Fatty acid biosynthesis;ko00640//Propanoate metabolism	K01962	GO:0044464//cell part;GO:0009528//plastid inner membrane;GO:0019866//organelle inner membrane;GO:0043226//organelle;GO:0005737//cytoplasm;GO:0009532//plastid stroma;GO:0016020//membrane;GO:0009536//plastid;GO:0009526//plastid envelope;GO:0031967//organelle envelope;GO:0042170//plastid membrane;GO:0031975//envelope;GO:0044444//cytoplasmic part;GO:0005623//cell;GO:0044424//intracellular part;GO:004…	GO:1901363//heterocyclic compound binding;GO:0003824//catalytic activity;GO:0001882//nucleoside binding;GO:0032549//ribonucleoside binding;GO:0001883//purine nucleoside binding;GO:0097159//organic cyclic compound binding;GO:0036094//small molecule binding;GO:0016885//ligase activity, forming carbon-carbon bonds;GO:0032550//purine ribonucleoside binding;GO:0016421//CoA carboxylase activity;GO:0005…	GO:0019752//carboxylic acid metabolic process;GO:1901566//organonitrogen compound biosynthetic process;GO:0034033//purine nucleoside bisphosphate biosynthetic process;GO:1901576//organic substance biosynthetic process;GO:0006163//purine nucleotide metabolic process;GO:0009058//biosynthetic process;GO:0006733//oxidoreduction coenzyme metabolic process;GO:0009260//ribonucleotide biosynthetic proces…
Gene010712	CIL1020S0079	Isoform023881	CIL1020S0079	new	CAC3	acetyl-coenzyme A carboxylase carboxyl transferase subunit alpha, chloroplastic; K01962 acetyl-CoA carboxylase carboxyl transferase subunit alpha [EC:6.4.1.2]	Metabolism	Global and Overview;Lipid metabolism;Carbohydrate metabolism	ko01100//Metabolic pathways;ko01110//Biosynthesis of secondary metabolites;ko01130//Biosynthesis of antibiotics;ko01120//Microbial metabolism in diverse environments;ko01200//Carbon metabolism;ko00620//Pyruvate metabolism;ko01212//Fatty acid metabolism;ko00061//Fatty acid biosynthesis;ko00640//Propanoate metabolism	K01962	GO:0009532//plastid stroma;GO:0042170//plastid membrane;GO:0044422//organelle part;GO:0044424//intracellular part;GO:0031090//organelle membrane;GO:0016020//membrane;GO:0005622//intracellular;GO:0043227//membrane-bounded organelle;GO:0009536//plastid;GO:0044464//cell part;GO:0043229//intracellular organelle;GO:0019866//organelle inner membrane;GO:0031967//organelle envelope;GO:0005623//cell;GO:00…	GO:1901363//heterocyclic compound binding;GO:0097367//carbohydrate derivative binding;GO:0032550//purine ribonucleoside binding;GO:0016874//ligase activity;GO:0016421//CoA carboxylase activity;GO:0016885//ligase activity, forming carbon-carbon bonds;GO:0005488//binding;GO:0097159//organic cyclic compound binding;GO:0001882//nucleoside binding;GO:0036094//small molecule binding;GO:0003824//catalyt…	GO:0019693//ribose phosphate metabolic process;GO:0009116//nucleoside metabolic process;GO:0042278//purine nucleoside metabolic process;GO:0009117//nucleotide metabolic process;GO:0042455//ribonucleoside biosynthetic process;GO:0034030//ribonucleoside bisphosphate biosynthetic process;GO:0046390//ribose phosphate biosynthetic process;GO:1901137//carbohydrate derivative biosynthetic process;GO:003…
Gene010712	CIL1020S0079	Isoform023882	CIL1020S0079	new	CAC3	acetyl-coenzyme A carboxylase carboxyl transferase subunit alpha, chloroplastic; K01962 acetyl-CoA carboxylase carboxyl transferase subunit alpha [EC:6.4.1.2]	Metabolism	Global and Overview;Lipid metabolism;Carbohydrate metabolism	ko01100//Metabolic pathways;ko01110//Biosynthesis of secondary metabolites;ko01130//Biosynthesis of antibiotics;ko01120//Microbial metabolism in diverse environments;ko01200//Carbon metabolism;ko00620//Pyruvate metabolism;ko01212//Fatty acid metabolism;ko00061//Fatty acid biosynthesis;ko00640//Propanoate metabolism	K01962	GO:0043227//membrane-bounded organelle;GO:0009532//plastid stroma;GO:0031975//envelope;GO:0044444//cytoplasmic part;GO:0031967//organelle envelope;GO:0005737//cytoplasm;GO:0043226//organelle;GO:0009526//plastid envelope;GO:0005623//cell;GO:0042170//plastid membrane;GO:0044464//cell part;GO:0044446//intracellular organelle part;GO:0005622//intracellular;GO:0044424//intracellular part;GO:0044422//o…	GO:0016421//CoA carboxylase activity;GO:0097159//organic cyclic compound binding;GO:0016885//ligase activity, forming carbon-carbon bonds;GO:0016874//ligase activity;GO:0032549//ribonucleoside binding;GO:0032550//purine ribonucleoside binding;GO:0001883//purine nucleoside binding;GO:0005488//binding;GO:0001882//nucleoside binding;GO:0003824//catalytic activity;GO:1901363//heterocyclic compound bi…	GO:0072521//purine-containing compound metabolic process;GO:0046128//purine ribonucleoside metabolic process;GO:0006732//coenzyme metabolic process;GO:0006733//oxidoreduction coenzyme metabolic process;GO:1901659//glycosyl compound biosynthetic process;GO:0034030//ribonucleoside bisphosphate biosynthetic process;GO:0044699//single-organism process;GO:1901576//organic substance biosynthetic proces…
Gene011728	CIL1056S0033	Isoform026054	CIL1056S0033	new	CAC3	acetyl-coenzyme A carboxylase carboxyl transferase subunit alpha, chloroplastic; K01962 acetyl-CoA carboxylase carboxyl transferase subunit alpha [EC:6.4.1.2]	Metabolism	Global and Overview;Carbohydrate metabolism;Lipid metabolism	ko01100//Metabolic pathways;ko01110//Biosynthesis of secondary metabolites;ko01130//Biosynthesis of antibiotics;ko01120//Microbial metabolism in diverse environments;ko01200//Carbon metabolism;ko00620//Pyruvate metabolism;ko01212//Fatty acid metabolism;ko00061//Fatty acid biosynthesis;ko00640//Propanoate metabolism	K01962	GO:0009532//plastid stroma;GO:0043226//organelle;GO:0009526//plastid envelope;GO:0044424//intracellular part;GO:0016020//membrane;GO:0043227//membrane-bounded organelle;GO:0019866//organelle inner membrane;GO:0031090//organelle membrane;GO:0031975//envelope;GO:0009536//plastid;GO:0005623//cell;GO:0044464//cell part;GO:0031967//organelle envelope;GO:0005622//intracellular;GO:0044446//intracellular…	GO:0097159//organic cyclic compound binding;GO:0016421//CoA carboxylase activity;GO:0001882//nucleoside binding;GO:0036094//small molecule binding;GO:0032550//purine ribonucleoside binding;GO:0003824//catalytic activity;GO:0016874//ligase activity;GO:1901363//heterocyclic compound binding;GO:0005488//binding;GO:0016885//ligase activity, forming carbon-carbon bonds;GO:0032549//ribonucleoside bindi…	GO:0009152//purine ribonucleotide biosynthetic process;GO:0033865//nucleoside bisphosphate metabolic process;GO:0019752//carboxylic acid metabolic process;GO:0046129//purine ribonucleoside biosynthetic process;GO:0044711//single-organism biosynthetic process;GO:0019693//ribose phosphate metabolic process;GO:1901362//organic cyclic compound biosynthetic process;GO:0015936//coenzyme A metabolic pro…
Gene011728	CIL1056S0033	Isoform026055	CIL1056S0033	new	CAC3	acetyl-coenzyme A carboxylase carboxyl transferase subunit alpha, chloroplastic; K01962 acetyl-CoA carboxylase carboxyl transferase subunit alpha [EC:6.4.1.2]	Metabolism	Carbohydrate metabolism;Lipid metabolism;Global and Overview	ko01100//Metabolic pathways;ko01110//Biosynthesis of secondary metabolites;ko01130//Biosynthesis of antibiotics;ko01120//Microbial metabolism in diverse environments;ko01200//Carbon metabolism;ko00620//Pyruvate metabolism;ko01212//Fatty acid metabolism;ko00061//Fatty acid biosynthesis;ko00640//Propanoate metabolism	K01962	GO:0031975//envelope;GO:0031967//organelle envelope;GO:0044435//plastid part;GO:0043226//organelle;GO:0005737//cytoplasm;GO:0009528//plastid inner membrane;GO:0019866//organelle inner membrane;GO:0044464//cell part;GO:0043231//intracellular membrane-bounded organelle;GO:0005622//intracellular;GO:0044422//organelle part;GO:0009526//plastid envelope;GO:0031090//organelle membrane;GO:0009536//plasti…	GO:0005488//binding;GO:0032550//purine ribonucleoside binding;GO:0016874//ligase activity;GO:0001883//purine nucleoside binding;GO:0097159//organic cyclic compound binding;GO:0097367//carbohydrate derivative binding;GO:0003824//catalytic activity;GO:0001882//nucleoside binding;GO:0016421//CoA carboxylase activity;GO:0036094//small molecule binding;GO:0032549//ribonucleoside binding;GO:0016885//li…	GO:0044255//cellular lipid metabolic process;GO:0033866//nucleoside bisphosphate biosynthetic process;GO:0055086//nucleobase-containing small molecule metabolic process;GO:1901564//organonitrogen compound metabolic process;GO:1901661//quinone metabolic process;GO:0044271//cellular nitrogen compound biosynthetic process;GO:0042180//cellular ketone metabolic process;GO:0046390//ribose phosphate bio…
Gene011728	CIL1056S0033	Isoform026056	CIL1056S0033	new	CAC3	acetyl-coenzyme A carboxylase carboxyl transferase subunit alpha, chloroplastic; K01962 acetyl-CoA carboxylase carboxyl transferase subunit alpha [EC:6.4.1.2]	Metabolism	Global and Overview;Carbohydrate metabolism;Lipid metabolism	ko01100//Metabolic pathways;ko01110//Biosynthesis of secondary metabolites;ko01130//Biosynthesis of antibiotics;ko01120//Microbial metabolism in diverse environments;ko01200//Carbon metabolism;ko00620//Pyruvate metabolism;ko01212//Fatty acid metabolism;ko00061//Fatty acid biosynthesis;ko00640//Propanoate metabolism	K01962	GO:0009526//plastid envelope;GO:0009532//plastid stroma;GO:0044424//intracellular part;GO:0043227//membrane-bounded organelle;GO:0005737//cytoplasm;GO:0031975//envelope;GO:0043226//organelle;GO:0043229//intracellular organelle;GO:0005623//cell;GO:0009536//plastid;GO:0031967//organelle envelope;GO:0043231//intracellular membrane-bounded organelle;GO:0031090//organelle membrane;GO:0019866//organell…	GO:0097367//carbohydrate derivative binding;GO:0003824//catalytic activity;GO:0032550//purine ribonucleoside binding;GO:1901363//heterocyclic compound binding;GO:0036094//small molecule binding;GO:0001882//nucleoside binding;GO:0032549//ribonucleoside binding;GO:0016421//CoA carboxylase activity;GO:0016885//ligase activity, forming carbon-carbon bonds;GO:0097159//organic cyclic compound binding;G…	GO:0033866//nucleoside bisphosphate biosynthetic process;GO:0044710//single-organism metabolic process;GO:0018130//heterocycle biosynthetic process;GO:0044763//single-organism cellular process;GO:0034033//purine nucleoside bisphosphate biosynthetic process;GO:0044249//cellular biosynthetic process;GO:0015936//coenzyme A metabolic process;GO:1901293//nucleoside phosphate biosynthetic process;GO:00…
Gene011728	CIL1056S0033	Isoform026057	CIL1056S0033	new	CAC3	acetyl-coenzyme A carboxylase carboxyl transferase subunit alpha, chloroplastic; K01962 acetyl-CoA carboxylase carboxyl transferase subunit alpha [EC:6.4.1.2]	Metabolism	Lipid metabolism;Carbohydrate metabolism;Global and Overview	ko01100//Metabolic pathways;ko01110//Biosynthesis of secondary metabolites;ko01130//Biosynthesis of antibiotics;ko01120//Microbial metabolism in diverse environments;ko01200//Carbon metabolism;ko00620//Pyruvate metabolism;ko01212//Fatty acid metabolism;ko00061//Fatty acid biosynthesis;ko00640//Propanoate metabolism	K01962	GO:0042170//plastid membrane;GO:0019866//organelle inner membrane;GO:0031967//organelle envelope;GO:0009536//plastid;GO:0016020//membrane;GO:0043229//intracellular organelle;GO:0005623//cell;GO:0009532//plastid stroma;GO:0044435//plastid part;GO:0044464//cell part;GO:0044424//intracellular part;GO:0009526//plastid envelope;GO:0043231//intracellular membrane-bounded organelle;GO:0031975//envelope;…	GO:0097159//organic cyclic compound binding;GO:0032550//purine ribonucleoside binding;GO:0001883//purine nucleoside binding;GO:0005488//binding;GO:0001882//nucleoside binding;GO:0032549//ribonucleoside binding;GO:0036094//small molecule binding;GO:0016885//ligase activity, forming carbon-carbon bonds;GO:0003824//catalytic activity;GO:0097367//carbohydrate derivative binding;GO:0016421//CoA carbox…	GO:0006139//nucleobase-containing compound metabolic process;GO:0009150//purine ribonucleotide metabolic process;GO:0055086//nucleobase-containing small molecule metabolic process;GO:0006725//cellular aromatic compound metabolic process;GO:0019752//carboxylic acid metabolic process;GO:0033875//ribonucleoside bisphosphate metabolic process;GO:0044711//single-organism biosynthetic process;GO:001943…
Gene011728	CIL1056S0033	Isoform026058	CIL1056S0033	new	CAC3	acetyl-coenzyme A carboxylase carboxyl transferase subunit alpha, chloroplastic; K01962 acetyl-CoA carboxylase carboxyl transferase subunit alpha [EC:6.4.1.2]	Metabolism	Lipid metabolism;Carbohydrate metabolism;Global and Overview	ko01100//Metabolic pathways;ko01110//Biosynthesis of secondary metabolites;ko01130//Biosynthesis of antibiotics;ko01120//Microbial metabolism in diverse environments;ko01200//Carbon metabolism;ko00620//Pyruvate metabolism;ko01212//Fatty acid metabolism;ko00061//Fatty acid biosynthesis;ko00640//Propanoate metabolism	K01962	GO:0005737//cytoplasm;GO:0044444//cytoplasmic part;GO:0016020//membrane;GO:0009536//plastid;GO:0043226//organelle;GO:0043231//intracellular membrane-bounded organelle;GO:0005623//cell;GO:0009528//plastid inner membrane;GO:0044422//organelle part;GO:0005622//intracellular;GO:0019866//organelle inner membrane;GO:0009532//plastid stroma;GO:0031967//organelle envelope;GO:0044435//plastid part;GO:0044…	GO:0032549//ribonucleoside binding;GO:0016874//ligase activity;GO:0016421//CoA carboxylase activity;GO:0001883//purine nucleoside binding;GO:0032550//purine ribonucleoside binding;GO:0036094//small molecule binding;GO:0016885//ligase activity, forming carbon-carbon bonds;GO:0003824//catalytic activity;GO:0097367//carbohydrate derivative binding;GO:0001882//nucleoside binding;GO:1901363//heterocyc…	GO:1901657//glycosyl compound metabolic process;GO:0009116//nucleoside metabolic process;GO:0006082//organic acid metabolic process;GO:0009058//biosynthetic process;GO:0044710//single-organism metabolic process;GO:0009150//purine ribonucleotide metabolic process;GO:0006631//fatty acid metabolic process;GO:0009108//coenzyme biosynthetic process;GO:0051188//cofactor biosynthetic process;GO:0032787/…
Gene011728	CIL1056S0033	Isoform026059	CIL1056S0033	new	CAC3	acetyl-coenzyme A carboxylase carboxyl transferase subunit alpha, chloroplastic; K01962 acetyl-CoA carboxylase carboxyl transferase subunit alpha [EC:6.4.1.2]	Metabolism	Lipid metabolism;Carbohydrate metabolism;Global and Overview	ko01100//Metabolic pathways;ko01110//Biosynthesis of secondary metabolites;ko01130//Biosynthesis of antibiotics;ko01120//Microbial metabolism in diverse environments;ko01200//Carbon metabolism;ko00620//Pyruvate metabolism;ko01212//Fatty acid metabolism;ko00061//Fatty acid biosynthesis;ko00640//Propanoate metabolism	K01962	GO:0005622//intracellular;GO:0044422//organelle part;GO:0009528//plastid inner membrane;GO:0031967//organelle envelope;GO:0043231//intracellular membrane-bounded organelle;GO:0042170//plastid membrane;GO:0005737//cytoplasm;GO:0009536//plastid;GO:0031090//organelle membrane;GO:0043226//organelle;GO:0019866//organelle inner membrane;GO:0016020//membrane;GO:0031975//envelope;GO:0009526//plastid enve…	GO:0016885//ligase activity, forming carbon-carbon bonds;GO:0036094//small molecule binding;GO:0097367//carbohydrate derivative binding;GO:0016874//ligase activity;GO:0016421//CoA carboxylase activity;GO:0032550//purine ribonucleoside binding;GO:0032549//ribonucleoside binding;GO:1901363//heterocyclic compound binding;GO:0005488//binding;GO:0001882//nucleoside binding;GO:0001883//purine nucleosid…	GO:0034032//purine nucleoside bisphosphate metabolic process;GO:0019752//carboxylic acid metabolic process;GO:0044699//single-organism process;GO:0055086//nucleobase-containing small molecule metabolic process;GO:0009165//nucleotide biosynthetic process;GO:0009987//cellular process;GO:0042451//purine nucleoside biosynthetic process;GO:0006793//phosphorus metabolic process;GO:0072521//purine-conta…
Gene011728	CIL1056S0033	Isoform026060	CIL1056S0033	new	CAC3	acetyl-coenzyme A carboxylase carboxyl transferase subunit alpha, chloroplastic; K01962 acetyl-CoA carboxylase carboxyl transferase subunit alpha [EC:6.4.1.2]	Metabolism	Carbohydrate metabolism;Lipid metabolism;Global and Overview	ko01100//Metabolic pathways;ko01110//Biosynthesis of secondary metabolites;ko01130//Biosynthesis of antibiotics;ko01120//Microbial metabolism in diverse environments;ko01200//Carbon metabolism;ko00620//Pyruvate metabolism;ko01212//Fatty acid metabolism;ko00061//Fatty acid biosynthesis;ko00640//Propanoate metabolism	K01962	GO:0005623//cell;GO:0009536//plastid;GO:0019866//organelle inner membrane;GO:0043229//intracellular organelle;GO:0005737//cytoplasm;GO:0044435//plastid part;GO:0016020//membrane;GO:0031975//envelope;GO:0031090//organelle membrane;GO:0044424//intracellular part;GO:0005622//intracellular;GO:0044422//organelle part;GO:0044444//cytoplasmic part;GO:0043231//intracellular membrane-bounded organelle;GO:…	GO:0032549//ribonucleoside binding;GO:0036094//small molecule binding;GO:0001883//purine nucleoside binding;GO:0005488//binding;GO:0001882//nucleoside binding;GO:0003824//catalytic activity;GO:0032550//purine ribonucleoside binding;GO:0016421//CoA carboxylase activity;GO:0097367//carbohydrate derivative binding;GO:0016874//ligase activity;GO:0016885//ligase activity, forming carbon-carbon bonds;G…	GO:0009260//ribonucleotide biosynthetic process;GO:0034032//purine nucleoside bisphosphate metabolic process;GO:1901576//organic substance biosynthetic process;GO:0044763//single-organism cellular process;GO:0019693//ribose phosphate metabolic process;GO:0090407//organophosphate biosynthetic process;GO:0051188//cofactor biosynthetic process;GO:0043436//oxoacid metabolic process;GO:0034030//ribonu…
Gene011728	CIL1056S0033	Isoform026061	CIL1056S0033	new	CAC3	acetyl-coenzyme A carboxylase carboxyl transferase subunit alpha, chloroplastic; K01962 acetyl-CoA carboxylase carboxyl transferase subunit alpha [EC:6.4.1.2]	Metabolism	Carbohydrate metabolism;Lipid metabolism;Global and Overview	ko01100//Metabolic pathways;ko01110//Biosynthesis of secondary metabolites;ko01130//Biosynthesis of antibiotics;ko01120//Microbial metabolism in diverse environments;ko01200//Carbon metabolism;ko00620//Pyruvate metabolism;ko01212//Fatty acid metabolism;ko00061//Fatty acid biosynthesis;ko00640//Propanoate metabolism	K01962	GO:0044422//organelle part;GO:0031975//envelope;GO:0044424//intracellular part;GO:0005622//intracellular;GO:0009526//plastid envelope;GO:0043226//organelle;GO:0043231//intracellular membrane-bounded organelle;GO:0016020//membrane;GO:0043229//intracellular organelle;GO:0019866//organelle inner membrane;GO:0044446//intracellular organelle part;GO:0044435//plastid part;GO:0042170//plastid membrane;G…	GO:0016421//CoA carboxylase activity;GO:0001883//purine nucleoside binding;GO:0016885//ligase activity, forming carbon-carbon bonds;GO:0003824//catalytic activity;GO:0036094//small molecule binding;GO:0001882//nucleoside binding;GO:0016874//ligase activity;GO:1901363//heterocyclic compound binding;GO:0005488//binding;GO:0097159//organic cyclic compound binding;GO:0097367//carbohydrate derivative …	GO:1901135//carbohydrate derivative metabolic process;GO:0006753//nucleoside phosphate metabolic process;GO:0042180//cellular ketone metabolic process;GO:0009163//nucleoside biosynthetic process;GO:0006629//lipid metabolic process;GO:0042455//ribonucleoside biosynthetic process;GO:0006725//cellular aromatic compound metabolic process;GO:0044238//primary metabolic process;GO:0071704//organic subst…
Gene011728	CIL1056S0033	Isoform026062	CIL1056S0033	new	CAC3	acetyl-coenzyme A carboxylase carboxyl transferase subunit alpha, chloroplastic; K01962 acetyl-CoA carboxylase carboxyl transferase subunit alpha [EC:6.4.1.2]	Metabolism	Global and Overview;Lipid metabolism;Carbohydrate metabolism	ko01100//Metabolic pathways;ko01110//Biosynthesis of secondary metabolites;ko01130//Biosynthesis of antibiotics;ko01120//Microbial metabolism in diverse environments;ko01200//Carbon metabolism;ko00620//Pyruvate metabolism;ko01212//Fatty acid metabolism;ko00061//Fatty acid biosynthesis;ko00640//Propanoate metabolism	K01962	GO:0043227//membrane-bounded organelle;GO:0019866//organelle inner membrane;GO:0009532//plastid stroma;GO:0016020//membrane;GO:0044464//cell part;GO:0031975//envelope;GO:0044446//intracellular organelle part;GO:0042170//plastid membrane;GO:0005737//cytoplasm;GO:0009526//plastid envelope;GO:0044424//intracellular part;GO:0005623//cell;GO:0043226//organelle;GO:0044444//cytoplasmic part;GO:0005622//…	GO:0016874//ligase activity;GO:0003824//catalytic activity;GO:0016421//CoA carboxylase activity;GO:0097367//carbohydrate derivative binding;GO:0001882//nucleoside binding;GO:0036094//small molecule binding;GO:0001883//purine nucleoside binding;GO:0016885//ligase activity, forming carbon-carbon bonds;GO:0032550//purine ribonucleoside binding;GO:0032549//ribonucleoside binding;GO:0097159//organic c…	GO:0034641//cellular nitrogen compound metabolic process;GO:0044710//single-organism metabolic process;GO:0051188//cofactor biosynthetic process;GO:0034032//purine nucleoside bisphosphate metabolic process;GO:0042278//purine nucleoside metabolic process;GO:0044237//cellular metabolic process;GO:0006732//coenzyme metabolic process;GO:0009152//purine ribonucleotide biosynthetic process;GO:0006631//…
Gene011728	CIL1056S0033	Isoform026063	CIL1056S0033	new	CAC3	acetyl-coenzyme A carboxylase carboxyl transferase subunit alpha, chloroplastic; K01962 acetyl-CoA carboxylase carboxyl transferase subunit alpha [EC:6.4.1.2]	Metabolism	Global and Overview;Carbohydrate metabolism;Lipid metabolism	ko01100//Metabolic pathways;ko01110//Biosynthesis of secondary metabolites;ko01130//Biosynthesis of antibiotics;ko01120//Microbial metabolism in diverse environments;ko01200//Carbon metabolism;ko00620//Pyruvate metabolism;ko01212//Fatty acid metabolism;ko00061//Fatty acid biosynthesis;ko00640//Propanoate metabolism	K01962	GO:0044435//plastid part;GO:0009526//plastid envelope;GO:0042170//plastid membrane;GO:0016020//membrane;GO:0005737//cytoplasm;GO:0044444//cytoplasmic part;GO:0044446//intracellular organelle part;GO:0005622//intracellular;GO:0044422//organelle part;GO:0031975//envelope;GO:0031967//organelle envelope;GO:0043231//intracellular membrane-bounded organelle;GO:0043227//membrane-bounded organelle;GO:001…	GO:0036094//small molecule binding;GO:0032549//ribonucleoside binding;GO:0001883//purine nucleoside binding;GO:0003824//catalytic activity;GO:0016885//ligase activity, forming carbon-carbon bonds;GO:0016421//CoA carboxylase activity;GO:0097159//organic cyclic compound binding;GO:1901363//heterocyclic compound binding;GO:0032550//purine ribonucleoside binding;GO:0001882//nucleoside binding;GO:0097…	GO:0042180//cellular ketone metabolic process;GO:0044281//small molecule metabolic process;GO:0042455//ribonucleoside biosynthetic process;GO:1901360//organic cyclic compound metabolic process;GO:0008152//metabolic process;GO:0051188//cofactor biosynthetic process;GO:0006732//coenzyme metabolic process;GO:0006753//nucleoside phosphate metabolic process;GO:0034032//purine nucleoside bisphosphate m…
Gene011728	CIL1056S0033	Isoform026064	CIL1056S0033	new	CAC3	acetyl-coenzyme A carboxylase carboxyl transferase subunit alpha, chloroplastic; K01962 acetyl-CoA carboxylase carboxyl transferase subunit alpha [EC:6.4.1.2]	Metabolism	Global and Overview;Lipid metabolism;Carbohydrate metabolism	ko01100//Metabolic pathways;ko01110//Biosynthesis of secondary metabolites;ko01130//Biosynthesis of antibiotics;ko01120//Microbial metabolism in diverse environments;ko01200//Carbon metabolism;ko00620//Pyruvate metabolism;ko01212//Fatty acid metabolism;ko00061//Fatty acid biosynthesis;ko00640//Propanoate metabolism	K01962	GO:0044464//cell part;GO:0031967//organelle envelope;GO:0043226//organelle;GO:0009528//plastid inner membrane;GO:0009532//plastid stroma;GO:0044446//intracellular organelle part;GO:0005623//cell;GO:0042170//plastid membrane;GO:0016020//membrane;GO:0009536//plastid;GO:0005737//cytoplasm;GO:0031975//envelope;GO:0019866//organelle inner membrane;GO:0043227//membrane-bounded organelle;GO:0044424//int…	GO:0003824//catalytic activity;GO:0097367//carbohydrate derivative binding;GO:0016885//ligase activity, forming carbon-carbon bonds;GO:0036094//small molecule binding;GO:1901363//heterocyclic compound binding;GO:0001883//purine nucleoside binding;GO:0016874//ligase activity;GO:0005488//binding;GO:0097159//organic cyclic compound binding;GO:0001882//nucleoside binding;GO:0032550//purine ribonucleo…	GO:0090407//organophosphate biosynthetic process;GO:0019438//aromatic compound biosynthetic process;GO:0009108//coenzyme biosynthetic process;GO:0009260//ribonucleotide biosynthetic process;GO:0009117//nucleotide metabolic process;GO:0051186//cofactor metabolic process;GO:0044711//single-organism biosynthetic process;GO:1901576//organic substance biosynthetic process;GO:1901135//carbohydrate deri…
Gene011728	CIL1056S0033	Isoform026066	CIL1056S0033	new	CAC3	acetyl-coenzyme A carboxylase carboxyl transferase subunit alpha, chloroplastic; K01962 acetyl-CoA carboxylase carboxyl transferase subunit alpha [EC:6.4.1.2]	Metabolism	Global and Overview;Carbohydrate metabolism;Lipid metabolism	ko01100//Metabolic pathways;ko01110//Biosynthesis of secondary metabolites;ko01130//Biosynthesis of antibiotics;ko01120//Microbial metabolism in diverse environments;ko01200//Carbon metabolism;ko00620//Pyruvate metabolism;ko01212//Fatty acid metabolism;ko00061//Fatty acid biosynthesis;ko00640//Propanoate metabolism	K01962	GO:0043227//membrane-bounded organelle;GO:0044464//cell part;GO:0043226//organelle;GO:0009536//plastid;GO:0005737//cytoplasm;GO:0005622//intracellular;GO:0005623//cell;GO:0044422//organelle part;GO:0043231//intracellular membrane-bounded organelle;GO:0044444//cytoplasmic part;GO:0031967//organelle envelope;GO:0044435//plastid part;GO:0043229//intracellular organelle;GO:0044424//intracellular part…	GO:1901363//heterocyclic compound binding;GO:0032549//ribonucleoside binding;GO:0001883//purine nucleoside binding;GO:0097367//carbohydrate derivative binding;GO:0005488//binding;GO:0032550//purine ribonucleoside binding;GO:0097159//organic cyclic compound binding;GO:0003824//catalytic activity;GO:0036094//small molecule binding;GO:0016874//ligase activity;GO:0001882//nucleoside binding;GO:001688…	GO:0006164//purine nucleotide biosynthetic process;GO:1901293//nucleoside phosphate biosynthetic process;GO:0009119//ribonucleoside metabolic process;GO:0006082//organic acid metabolic process;GO:1901661//quinone metabolic process;GO:0046129//purine ribonucleoside biosynthetic process;GO:0009116//nucleoside metabolic process;GO:0051188//cofactor biosynthetic process;GO:0044711//single-organism bi…
Gene011728	CIL1056S0033	Isoform026067	CIL1056S0033	new	CAC3	acetyl-coenzyme A carboxylase carboxyl transferase subunit alpha, chloroplastic; K01962 acetyl-CoA carboxylase carboxyl transferase subunit alpha [EC:6.4.1.2]	Metabolism	Lipid metabolism;Carbohydrate metabolism;Global and Overview	ko01100//Metabolic pathways;ko01110//Biosynthesis of secondary metabolites;ko01130//Biosynthesis of antibiotics;ko01120//Microbial metabolism in diverse environments;ko01200//Carbon metabolism;ko00620//Pyruvate metabolism;ko01212//Fatty acid metabolism;ko00061//Fatty acid biosynthesis;ko00640//Propanoate metabolism	K01962	GO:0009526//plastid envelope;GO:0009536//plastid;GO:0044446//intracellular organelle part;GO:0009532//plastid stroma;GO:0044422//organelle part;GO:0019866//organelle inner membrane;GO:0031975//envelope;GO:0043226//organelle;GO:0009528//plastid inner membrane;GO:0031090//organelle membrane;GO:0005623//cell;GO:0044435//plastid part;GO:0043227//membrane-bounded organelle;GO:0044444//cytoplasmic part…	GO:0036094//small molecule binding;GO:0016421//CoA carboxylase activity;GO:0001883//purine nucleoside binding;GO:0001882//nucleoside binding;GO:0003824//catalytic activity;GO:0032549//ribonucleoside binding;GO:0005488//binding;GO:0097159//organic cyclic compound binding;GO:0016885//ligase activity, forming carbon-carbon bonds;GO:1901363//heterocyclic compound binding;GO:0097367//carbohydrate deri…	GO:0009150//purine ribonucleotide metabolic process;GO:0033865//nucleoside bisphosphate metabolic process;GO:0008152//metabolic process;GO:0034032//purine nucleoside bisphosphate metabolic process;GO:0072522//purine-containing compound biosynthetic process;GO:0044711//single-organism biosynthetic process;GO:0015936//coenzyme A metabolic process;GO:0009058//biosynthetic process;GO:0006753//nucleos…
Gene011728	CIL1056S0033	Isoform026068	CIL1056S0033	new	CAC3	acetyl-coenzyme A carboxylase carboxyl transferase subunit alpha, chloroplastic; K01962 acetyl-CoA carboxylase carboxyl transferase subunit alpha [EC:6.4.1.2]	Metabolism	Lipid metabolism;Carbohydrate metabolism;Global and Overview	ko01100//Metabolic pathways;ko01110//Biosynthesis of secondary metabolites;ko01130//Biosynthesis of antibiotics;ko01120//Microbial metabolism in diverse environments;ko01200//Carbon metabolism;ko00620//Pyruvate metabolism;ko01212//Fatty acid metabolism;ko00061//Fatty acid biosynthesis;ko00640//Propanoate metabolism	K01962	GO:0031975//envelope;GO:0009526//plastid envelope;GO:0044446//intracellular organelle part;GO:0016020//membrane;GO:0019866//organelle inner membrane;GO:0005623//cell;GO:0044464//cell part;GO:0044424//intracellular part;GO:0044444//cytoplasmic part;GO:0031967//organelle envelope;GO:0009528//plastid inner membrane;GO:0009532//plastid stroma;GO:0043229//intracellular organelle;GO:0042170//plastid me…	GO:0036094//small molecule binding;GO:0097367//carbohydrate derivative binding;GO:0016421//CoA carboxylase activity;GO:0032549//ribonucleoside binding;GO:0097159//organic cyclic compound binding;GO:0005488//binding;GO:1901363//heterocyclic compound binding;GO:0003824//catalytic activity;GO:0001883//purine nucleoside binding;GO:0016874//ligase activity;GO:0016885//ligase activity, forming carbon-c…	GO:0034641//cellular nitrogen compound metabolic process;GO:1901137//carbohydrate derivative biosynthetic process;GO:0019438//aromatic compound biosynthetic process;GO:0044699//single-organism process;GO:1901360//organic cyclic compound metabolic process;GO:0009987//cellular process;GO:0006807//nitrogen compound metabolic process;GO:0006733//oxidoreduction coenzyme metabolic process;GO:0009165//n…
Gene011728	CIL1056S0033	Isoform026069	CIL1056S0033	new	CAC3	acetyl-coenzyme A carboxylase carboxyl transferase subunit alpha, chloroplastic; K01962 acetyl-CoA carboxylase carboxyl transferase subunit alpha [EC:6.4.1.2]	Metabolism	Global and Overview;Lipid metabolism;Carbohydrate metabolism	ko01100//Metabolic pathways;ko01110//Biosynthesis of secondary metabolites;ko01130//Biosynthesis of antibiotics;ko01120//Microbial metabolism in diverse environments;ko01200//Carbon metabolism;ko00620//Pyruvate metabolism;ko01212//Fatty acid metabolism;ko00061//Fatty acid biosynthesis;ko00640//Propanoate metabolism	K01962	GO:0009528//plastid inner membrane;GO:0005623//cell;GO:0009536//plastid;GO:0043227//membrane-bounded organelle;GO:0043231//intracellular membrane-bounded organelle;GO:0044422//organelle part;GO:0044424//intracellular part;GO:0031975//envelope;GO:0043226//organelle;GO:0005737//cytoplasm;GO:0044435//plastid part;GO:0044446//intracellular organelle part;GO:0042170//plastid membrane;GO:0009532//plast…	GO:0001882//nucleoside binding;GO:0032549//ribonucleoside binding;GO:0032550//purine ribonucleoside binding;GO:0097159//organic cyclic compound binding;GO:0016874//ligase activity;GO:0005488//binding;GO:0097367//carbohydrate derivative binding;GO:0036094//small molecule binding;GO:0003824//catalytic activity;GO:1901363//heterocyclic compound binding;GO:0016421//CoA carboxylase activity;GO:0016885…	GO:0044237//cellular metabolic process;GO:0019752//carboxylic acid metabolic process;GO:0006629//lipid metabolic process;GO:0043436//oxoacid metabolic process;GO:1901293//nucleoside phosphate biosynthetic process;GO:0044763//single-organism cellular process;GO:0044271//cellular nitrogen compound biosynthetic process;GO:0042451//purine nucleoside biosynthetic process;GO:1901564//organonitrogen com…
Gene011728	CIL1056S0033	Isoform026071	CIL1056S0033	new	CAC3	acetyl-coenzyme A carboxylase carboxyl transferase subunit alpha, chloroplastic; K01962 acetyl-CoA carboxylase carboxyl transferase subunit alpha [EC:6.4.1.2]	Metabolism	Carbohydrate metabolism;Lipid metabolism;Global and Overview	ko01100//Metabolic pathways;ko01110//Biosynthesis of secondary metabolites;ko01130//Biosynthesis of antibiotics;ko01120//Microbial metabolism in diverse environments;ko01200//Carbon metabolism;ko00620//Pyruvate metabolism;ko01212//Fatty acid metabolism;ko00061//Fatty acid biosynthesis;ko00640//Propanoate metabolism	K01962	GO:0031975//envelope;GO:0009526//plastid envelope;GO:0005737//cytoplasm;GO:0044444//cytoplasmic part;GO:0005622//intracellular;GO:0044435//plastid part;GO:0009528//plastid inner membrane;GO:0005623//cell;GO:0043226//organelle;GO:0009532//plastid stroma;GO:0043229//intracellular organelle;GO:0043227//membrane-bounded organelle;GO:0043231//intracellular membrane-bounded organelle;GO:0044464//cell p…	GO:0016421//CoA carboxylase activity;GO:0097159//organic cyclic compound binding;GO:0032550//purine ribonucleoside binding;GO:0001882//nucleoside binding;GO:0036094//small molecule binding;GO:0016874//ligase activity;GO:1901363//heterocyclic compound binding;GO:0032549//ribonucleoside binding;GO:0097367//carbohydrate derivative binding;GO:0001883//purine nucleoside binding;GO:0003824//catalytic a…	GO:0009117//nucleotide metabolic process;GO:0071704//organic substance metabolic process;GO:0008152//metabolic process;GO:0006753//nucleoside phosphate metabolic process;GO:0044255//cellular lipid metabolic process;GO:0044699//single-organism process;GO:0019637//organophosphate metabolic process;GO:0009987//cellular process;GO:0044281//small molecule metabolic process;GO:0006631//fatty acid metab…
Gene011728	CIL1056S0033	Isoform026072	CIL1056S0033	new	CAC3	acetyl-coenzyme A carboxylase carboxyl transferase subunit alpha, chloroplastic; K01962 acetyl-CoA carboxylase carboxyl transferase subunit alpha [EC:6.4.1.2]	Metabolism	Global and Overview;Lipid metabolism;Carbohydrate metabolism	ko01100//Metabolic pathways;ko01110//Biosynthesis of secondary metabolites;ko01130//Biosynthesis of antibiotics;ko01120//Microbial metabolism in diverse environments;ko01200//Carbon metabolism;ko00620//Pyruvate metabolism;ko01212//Fatty acid metabolism;ko00061//Fatty acid biosynthesis;ko00640//Propanoate metabolism	K01962	GO:0009526//plastid envelope;GO:0031090//organelle membrane;GO:0009536//plastid;GO:0005623//cell;GO:0005622//intracellular;GO:0043231//intracellular membrane-bounded organelle;GO:0044422//organelle part;GO:0005737//cytoplasm;GO:0044464//cell part;GO:0042170//plastid membrane;GO:0043229//intracellular organelle;GO:0043227//membrane-bounded organelle;GO:0016020//membrane;GO:0019866//organelle inner…	GO:0016421//CoA carboxylase activity;GO:0016885//ligase activity, forming carbon-carbon bonds;GO:0032549//ribonucleoside binding;GO:0005488//binding;GO:0003824//catalytic activity;GO:0036094//small molecule binding;GO:0001882//nucleoside binding;GO:1901363//heterocyclic compound binding;GO:0032550//purine ribonucleoside binding;GO:0097159//organic cyclic compound binding;GO:0001883//purine nucleo…	GO:0006733//oxidoreduction coenzyme metabolic process;GO:0042455//ribonucleoside biosynthetic process;GO:1901566//organonitrogen compound biosynthetic process;GO:0009058//biosynthetic process;GO:0044711//single-organism biosynthetic process;GO:0044249//cellular biosynthetic process;GO:0009165//nucleotide biosynthetic process;GO:0034032//purine nucleoside bisphosphate metabolic process;GO:0009116/…
Gene011728	CIL1056S0033	Isoform026073	CIL1056S0033	new	CAC3	acetyl-coenzyme A carboxylase carboxyl transferase subunit alpha, chloroplastic; K01962 acetyl-CoA carboxylase carboxyl transferase subunit alpha [EC:6.4.1.2]	Metabolism	Lipid metabolism;Carbohydrate metabolism;Global and Overview	ko01100//Metabolic pathways;ko01110//Biosynthesis of secondary metabolites;ko01130//Biosynthesis of antibiotics;ko01120//Microbial metabolism in diverse environments;ko01200//Carbon metabolism;ko00620//Pyruvate metabolism;ko01212//Fatty acid metabolism;ko00061//Fatty acid biosynthesis;ko00640//Propanoate metabolism	K01962	GO:0044446//intracellular organelle part;GO:0009526//plastid envelope;GO:0044422//organelle part;GO:0005623//cell;GO:0043226//organelle;GO:0043227//membrane-bounded organelle;GO:0044435//plastid part;GO:0044464//cell part;GO:0031090//organelle membrane;GO:0042170//plastid membrane;GO:0005737//cytoplasm;GO:0019866//organelle inner membrane;GO:0031967//organelle envelope;GO:0043231//intracellular m…	GO:0032549//ribonucleoside binding;GO:0016421//CoA carboxylase activity;GO:0016885//ligase activity, forming carbon-carbon bonds;GO:0097367//carbohydrate derivative binding;GO:0005488//binding;GO:0003824//catalytic activity;GO:0001883//purine nucleoside binding;GO:0032550//purine ribonucleoside binding;GO:0001882//nucleoside binding;GO:1901363//heterocyclic compound binding;GO:0036094//small mole…	GO:0018130//heterocycle biosynthetic process;GO:0044271//cellular nitrogen compound biosynthetic process;GO:0006733//oxidoreduction coenzyme metabolic process;GO:0009150//purine ribonucleotide metabolic process;GO:0019637//organophosphate metabolic process;GO:0046390//ribose phosphate biosynthetic process;GO:0019752//carboxylic acid metabolic process;GO:1901360//organic cyclic compound metabolic …
Gene013966	CIL0101S0010	Isoform031094	CIL0101S0010	new	CASBPX1	cycloartenol synthase-like; K01853 cycloartenol synthase [EC:5.4.99.8]	Metabolism	Global and Overview;Lipid metabolism	ko01100//Metabolic pathways;ko01110//Biosynthesis of secondary metabolites;ko00100//Steroid biosynthesis	K01853	-	-	-
Gene013966	CIL0101S0010	Isoform031095	CIL0101S0010	new	CASBPX1	cycloartenol synthase-like; K01853 cycloartenol synthase [EC:5.4.99.8]	Metabolism	Global and Overview;Lipid metabolism	ko01100//Metabolic pathways;ko01110//Biosynthesis of secondary metabolites;ko00100//Steroid biosynthesis	K01853	-	-	-
Gene010192	CIL0996S0040	Isoform022628	CIL0996S0040	new	CASBPX2	cycloartenol Synthase; K01853 cycloartenol synthase [EC:5.4.99.8]	Metabolism	Lipid metabolism;Global and Overview	ko01100//Metabolic pathways;ko01110//Biosynthesis of secondary metabolites;ko00100//Steroid biosynthesis	K01853	-	GO:0016853//isomerase activity;GO:0003824//catalytic activity	-
Gene010192	CIL0996S0040	Isoform022629	CIL0996S0040	new	CASBPX2	cycloartenol Synthase; K01853 cycloartenol synthase [EC:5.4.99.8]	Metabolism	Lipid metabolism;Global and Overview	ko01100//Metabolic pathways;ko01110//Biosynthesis of secondary metabolites;ko00100//Steroid biosynthesis	K01853	-	GO:0016853//isomerase activity;GO:0003824//catalytic activity	-
Gene010192	CIL0996S0040	Isoform022630	CIL0996S0040	new	CASBPX2	cycloartenol Synthase; K01853 cycloartenol synthase [EC:5.4.99.8]	Metabolism	Lipid metabolism;Global and Overview	ko01100//Metabolic pathways;ko01110//Biosynthesis of secondary metabolites;ko00100//Steroid biosynthesis	K01853	-	GO:0016853//isomerase activity;GO:0003824//catalytic activity	-
Gene010192	CIL0996S0040	Isoform022631	CIL0996S0040	new	CASBPX2	cycloartenol Synthase; K01853 cycloartenol synthase [EC:5.4.99.8]	Metabolism	Global and Overview;Lipid metabolism	ko01100//Metabolic pathways;ko01110//Biosynthesis of secondary metabolites;ko00100//Steroid biosynthesis	K01853	-	GO:0016853//isomerase activity;GO:0003824//catalytic activity	-
Gene010192	CIL0996S0040	Isoform022632	CIL0996S0040	new	CASBPX2	cycloartenol synthase-like; K01853 cycloartenol synthase [EC:5.4.99.8]	Metabolism	Lipid metabolism;Global and Overview	ko01100//Metabolic pathways;ko01110//Biosynthesis of secondary metabolites;ko00100//Steroid biosynthesis	K01853	-	GO:0016853//isomerase activity;GO:0003824//catalytic activity	-
Gene010192	CIL0996S0040	Isoform022633	CIL0996S0040	new	CASBPX2	cycloartenol Synthase; K01853 cycloartenol synthase [EC:5.4.99.8]	Metabolism	Lipid metabolism;Global and Overview	ko01100//Metabolic pathways;ko01110//Biosynthesis of secondary metabolites;ko00100//Steroid biosynthesis	K01853	-	GO:0016853//isomerase activity;GO:0003824//catalytic activity	-
Gene010192	CIL0996S0040	Isoform022634	CIL0996S0040	new	CASBPX2	cycloartenol Synthase; K01853 cycloartenol synthase [EC:5.4.99.8]	Metabolism	Global and Overview;Lipid metabolism	ko01100//Metabolic pathways;ko01110//Biosynthesis of secondary metabolites;ko00100//Steroid biosynthesis	K01853	-	GO:0003824//catalytic activity;GO:0016853//isomerase activity	-
Gene010192	CIL0996S0040	Isoform022635	CIL0996S0040	new	CASBPX2	cycloartenol Synthase; K01853 cycloartenol synthase [EC:5.4.99.8]	Metabolism	Global and Overview;Lipid metabolism	ko01100//Metabolic pathways;ko01110//Biosynthesis of secondary metabolites;ko00100//Steroid biosynthesis	K01853	-	GO:0003824//catalytic activity;GO:0016853//isomerase activity	-
Gene010192	CIL0996S0040	Isoform022636	CIL0996S0040	new	CASBPX2	cycloartenol Synthase; K01853 cycloartenol synthase [EC:5.4.99.8]	Metabolism	Global and Overview;Lipid metabolism	ko01100//Metabolic pathways;ko01110//Biosynthesis of secondary metabolites;ko00100//Steroid biosynthesis	K01853	-	GO:0003824//catalytic activity;GO:0016853//isomerase activity	-
Gene010192	CIL0996S0040	Isoform022637	CIL0996S0040	new	CASBPX2	cycloartenol Synthase; K01853 cycloartenol synthase [EC:5.4.99.8]	Metabolism	Global and Overview;Lipid metabolism	ko01100//Metabolic pathways;ko01110//Biosynthesis of secondary metabolites;ko00100//Steroid biosynthesis	K01853	-	GO:0003824//catalytic activity;GO:0016853//isomerase activity	-
Gene010192	CIL0996S0040	Isoform022638	CIL0996S0040	new	CASBPX2	cycloartenol Synthase; K01853 cycloartenol synthase [EC:5.4.99.8]	Metabolism	Global and Overview;Lipid metabolism	ko01100//Metabolic pathways;ko01110//Biosynthesis of secondary metabolites;ko00100//Steroid biosynthesis	K01853	-	GO:0003824//catalytic activity;GO:0016853//isomerase activity	-
Gene010192	CIL0996S0040	Isoform022639	CIL0996S0040	new	CASBPX2	cycloartenol Synthase; K01853 cycloartenol synthase [EC:5.4.99.8]	Metabolism	Global and Overview;Lipid metabolism	ko01100//Metabolic pathways;ko01110//Biosynthesis of secondary metabolites;ko00100//Steroid biosynthesis	K01853	-	GO:0016853//isomerase activity;GO:0003824//catalytic activity	-
Gene010192	CIL0996S0040	Isoform022640	CIL0996S0040	new	CASBPX2	cycloartenol Synthase; K01853 cycloartenol synthase [EC:5.4.99.8]	Metabolism	Global and Overview;Lipid metabolism	ko01100//Metabolic pathways;ko01110//Biosynthesis of secondary metabolites;ko00100//Steroid biosynthesis	K01853	-	GO:0003824//catalytic activity;GO:0016853//isomerase activity	-
Gene002639	CIL1420S0022	Isoform005781	CIL1420S0022	new	CCT1	choline-phosphate cytidylyltransferase 2-like	Metabolism	Global and Overview;Lipid metabolism	ko01100//Metabolic pathways;ko00564//Glycerophospholipid metabolism	K00968	-	GO:0003824//catalytic activity;GO:0016779//nucleotidyltransferase activity;GO:0070567//cytidylyltransferase activity;GO:0016740//transferase activity;GO:0016772//transferase activity, transferring phosphorus-containing groups	GO:1901564//organonitrogen compound metabolic process;GO:0044710//single-organism metabolic process;GO:1901617//organic hydroxy compound biosynthetic process;GO:0046165//alcohol biosynthetic process;GO:0046486//glycerolipid metabolic process;GO:0044249//cellular biosynthetic process;GO:0008654//phospholipid biosynthetic process;GO:1901615//organic hydroxy compound metabolic process;GO:0009058//bi…
Gene002647	-	Isoform005805	-	novel	CCT1	choline-phosphate cytidylyltransferase 1-like; K00968 choline-phosphate cytidylyltransferase [EC:2.7.7.15]	Metabolism	Lipid metabolism;Global and Overview	ko01100//Metabolic pathways;ko00564//Glycerophospholipid metabolism	K00968	-	-	-
Gene002647	-	Isoform005806	-	novel	CCT1	choline-phosphate cytidylyltransferase 1-like; K00968 choline-phosphate cytidylyltransferase [EC:2.7.7.15]	Metabolism	Lipid metabolism;Global and Overview	ko01100//Metabolic pathways;ko00564//Glycerophospholipid metabolism	K00968	-	-	-
Gene002639	CIL1420S0022	Isoform005780	CIL1420S0022	known	CCT2	PREDICTED: choline-phosphate cytidylyltransferase 1-like [Juglans regia]	Metabolism	Global and Overview;Lipid metabolism;Metabolism of other amino acids	ko01100//Metabolic pathways;ko00564//Glycerophospholipid metabolism;ko00440//Phosphonate and phosphinate metabolism	K00968	-	GO:0070567//cytidylyltransferase activity;GO:0016772//transferase activity, transferring phosphorus-containing groups;GO:0003824//catalytic activity;GO:0016779//nucleotidyltransferase activity;GO:0016740//transferase activity	GO:0097164//ammonium ion metabolic process;GO:0006650//glycerophospholipid metabolic process;GO:0006807//nitrogen compound metabolic process;GO:0006793//phosphorus metabolic process;GO:0046165//alcohol biosynthetic process;GO:0044255//cellular lipid metabolic process;GO:0044763//single-organism cellular process;GO:0044237//cellular metabolic process;GO:0044699//single-organism process;GO:0044249/…
Gene004365	CIL1555S0027	Isoform009509	CIL1555S0027	new	CDS1	phosphatidate cytidylyltransferase 1; K00981 phosphatidate cytidylyltransferase [EC:2.7.7.41]	Metabolism;Environmental Information Processing	Global and Overview;Lipid metabolism;Signal transduction	ko01100//Metabolic pathways;ko01110//Biosynthesis of secondary metabolites;ko00564//Glycerophospholipid metabolism;ko04070//Phosphatidylinositol signaling system	K00981	GO:0016020//membrane;GO:0044425//membrane part;GO:0031224//intrinsic component of membrane	GO:0016740//transferase activity;GO:0016772//transferase activity, transferring phosphorus-containing groups;GO:0003824//catalytic activity	GO:0044763//single-organism cellular process;GO:0009987//cellular process;GO:0044699//single-organism process;GO:0044710//single-organism metabolic process;GO:0008152//metabolic process;GO:0044255//cellular lipid metabolic process;GO:0006793//phosphorus metabolic process;GO:0006629//lipid metabolic process;GO:0044238//primary metabolic process;GO:0071704//organic substance metabolic process;GO:00…
Gene016212	CIL1230S0007	Isoform036362	CIL1230S0007	new	CDS2	phosphatidate cytidylyltransferase 1; K00981 phosphatidate cytidylyltransferase [EC:2.7.7.41]	Metabolism;Environmental Information Processing	Signal transduction;Lipid metabolism;Global and Overview	ko01100//Metabolic pathways;ko01110//Biosynthesis of secondary metabolites;ko00564//Glycerophospholipid metabolism;ko04070//Phosphatidylinositol signaling system	K00981	GO:0044425//membrane part;GO:0016020//membrane;GO:0031224//intrinsic component of membrane	GO:0016772//transferase activity, transferring phosphorus-containing groups;GO:0016740//transferase activity;GO:0003824//catalytic activity	GO:0044255//cellular lipid metabolic process;GO:0006796//phosphate-containing compound metabolic process;GO:0019637//organophosphate metabolic process;GO:0046486//glycerolipid metabolic process;GO:0044238//primary metabolic process;GO:0006793//phosphorus metabolic process;GO:0044763//single-organism cellular process;GO:0046341//CDP-diacylglycerol metabolic process;GO:0006644//phospholipid metabol…
Gene001712	CIL1353S0007	Isoform003725	CIL1353S0007	known	CDS4	PREDICTED: phosphatidate cytidylyltransferase 4, chloroplastic-like isoform X1 [Juglans regia]	Environmental Information Processing;Metabolism	Lipid metabolism;Signal transduction;Global and Overview	ko01100//Metabolic pathways;ko01110//Biosynthesis of secondary metabolites;ko00564//Glycerophospholipid metabolism;ko04070//Phosphatidylinositol signaling system	K00981	GO:0044425//membrane part;GO:0031224//intrinsic component of membrane;GO:0016020//membrane	GO:0003824//catalytic activity;GO:0016772//transferase activity, transferring phosphorus-containing groups;GO:0016740//transferase activity	GO:0044237//cellular metabolic process;GO:0008152//metabolic process;GO:0019637//organophosphate metabolic process;GO:0046486//glycerolipid metabolic process;GO:0044238//primary metabolic process;GO:0006644//phospholipid metabolic process;GO:0006650//glycerophospholipid metabolic process;GO:0046341//CDP-diacylglycerol metabolic process;GO:0044710//single-organism metabolic process;GO:0006629//lip…
Gene001712	CIL1353S0007	Isoform003726	CIL1353S0007	new	CDS4	phosphatidate cytidylyltransferase 4, chloroplastic; K00981 phosphatidate cytidylyltransferase [EC:2.7.7.41]	Metabolism;Environmental Information Processing	Lipid metabolism;Signal transduction;Global and Overview	ko01100//Metabolic pathways;ko01110//Biosynthesis of secondary metabolites;ko00564//Glycerophospholipid metabolism;ko04070//Phosphatidylinositol signaling system	K00981	GO:0016020//membrane;GO:0031224//intrinsic component of membrane;GO:0044425//membrane part	GO:0003824//catalytic activity;GO:0016740//transferase activity;GO:0016772//transferase activity, transferring phosphorus-containing groups	GO:0006650//glycerophospholipid metabolic process;GO:0006796//phosphate-containing compound metabolic process;GO:0044710//single-organism metabolic process;GO:0009987//cellular process;GO:0044238//primary metabolic process;GO:0006793//phosphorus metabolic process;GO:0044699//single-organism process;GO:0044763//single-organism cellular process;GO:0046486//glycerolipid metabolic process;GO:0044255/…
Gene006475	CIL0009S0017	Isoform014146	CIL0009S0017	new	CERK	ceramide kinase; K04715 ceramide kinase [EC:2.7.1.138]	Metabolism	Lipid metabolism	ko00600//Sphingolipid metabolism	K04715	-	-	-
Gene006475	CIL0009S0017	Isoform014147	CIL0009S0017	new	CERK	ceramide kinase-like; K04715 ceramide kinase [EC:2.7.1.138]	Metabolism	Lipid metabolism	ko00600//Sphingolipid metabolism	K04715	-	-	-
Gene006475	CIL0009S0017	Isoform014148	CIL0009S0017	new	CERK	ceramide kinase; K04715 ceramide kinase [EC:2.7.1.138]	Metabolism	Lipid metabolism	ko00600//Sphingolipid metabolism	K04715	-	-	-
Gene006475	CIL0009S0017	Isoform014149	CIL0009S0017	new	CERK	ceramide kinase; K04715 ceramide kinase [EC:2.7.1.138]	Metabolism	Lipid metabolism	ko00600//Sphingolipid metabolism	K04715	-	-	-
Gene006475	CIL0009S0017	Isoform014150	CIL0009S0017	new	CERK	ceramide kinase-like; K04715 ceramide kinase [EC:2.7.1.138]	Metabolism	Lipid metabolism	ko00600//Sphingolipid metabolism	K04715	-	-	-
Gene006475	CIL0009S0017	Isoform014151	CIL0009S0017	new	CERK	ceramide kinase-like; K04715 ceramide kinase [EC:2.7.1.138]	Metabolism	Lipid metabolism	ko00600//Sphingolipid metabolism	K04715	-	-	-
Gene006475	CIL0009S0017	Isoform014152	CIL0009S0017	new	CERK	ceramide kinase; K04715 ceramide kinase [EC:2.7.1.138]	Metabolism	Lipid metabolism	ko00600//Sphingolipid metabolism	K04715	-	-	GO:0008152//metabolic process;GO:0009987//cellular process
Gene006482	-	Isoform014165	-	novel	CERK	ceramide kinase-like; K04715 ceramide kinase [EC:2.7.1.138]	Metabolism	Lipid metabolism	ko00600//Sphingolipid metabolism	K04715	-	-	-
Gene010970	CIL1029S0036	Isoform024390	CIL1029S0036	new	CK1	probable choline kinase 1; K14156 choline/ethanolamine kinase [EC:2.7.1.32 2.7.1.82]	Metabolism	Lipid metabolism;Global and Overview	ko01100//Metabolic pathways;ko00564//Glycerophospholipid metabolism	K14156	-	GO:0016740//transferase activity;GO:0016772//transferase activity, transferring phosphorus-containing groups;GO:0003824//catalytic activity	GO:0006644//phospholipid metabolic process;GO:0006796//phosphate-containing compound metabolic process;GO:0006629//lipid metabolic process;GO:0019637//organophosphate metabolic process;GO:0044238//primary metabolic process;GO:0044237//cellular metabolic process;GO:0008152//metabolic process;GO:0009987//cellular process;GO:0006793//phosphorus metabolic process;GO:0044255//cellular lipid metabolic …
Gene003381	CIL1476S0021	Isoform007341	CIL1476S0021	new	CLKR27	POPTRDRAFT_726104; 3-oxoacyl-[acyl-carrier-protein] reductase; K00059 3-oxoacyl-[acyl-carrier protein] reductase [EC:1.1.1.100]	Metabolism	Lipid metabolism;Metabolism of cofactors and vitamins;Global and Overview	ko01100//Metabolic pathways;ko01212//Fatty acid metabolism;ko00061//Fatty acid biosynthesis;ko01040//Biosynthesis of unsaturated fatty acids;ko00780//Biotin metabolism	K00059	GO:0031975//envelope;GO:0043227//membrane-bounded organelle;GO:0005737//cytoplasm;GO:0043226//organelle;GO:0044444//cytoplasmic part;GO:0043231//intracellular membrane-bounded organelle;GO:0009536//plastid;GO:0044422//organelle part;GO:0009526//plastid envelope;GO:0009532//plastid stroma;GO:0044435//plastid part;GO:0005622//intracellular;GO:0043229//intracellular organelle;GO:0005623//cell;GO:003…	GO:1901363//heterocyclic compound binding;GO:0016740//transferase activity;GO:0004312//fatty acid synthase activity;GO:0005488//binding;GO:0043169//cation binding;GO:0016747//transferase activity, transferring acyl groups other than amino-acyl groups;GO:0046914//transition metal ion binding;GO:0000166//nucleotide binding;GO:0043167//ion binding;GO:0003824//catalytic activity;GO:0097159//organic c…	GO:0006629//lipid metabolic process;GO:0044767//single-organism developmental process;GO:0006631//fatty acid metabolic process;GO:0009987//cellular process;GO:0044237//cellular metabolic process;GO:0032502//developmental process;GO:0032787//monocarboxylic acid metabolic process;GO:0006950//response to stress;GO:0008152//metabolic process;GO:0019752//carboxylic acid metabolic process;GO:0050896//r…
Gene010972	CIL1029S0041	Isoform024394	CIL1029S0041	new	CLKR27	3-oxoacyl-[acyl-carrier-protein] reductase 4; K00059 3-oxoacyl-[acyl-carrier protein] reductase [EC:1.1.1.100]	Metabolism	Global and Overview;Lipid metabolism;Metabolism of cofactors and vitamins	ko01100//Metabolic pathways;ko01212//Fatty acid metabolism;ko00061//Fatty acid biosynthesis;ko01040//Biosynthesis of unsaturated fatty acids;ko00780//Biotin metabolism	K00059	-	GO:1901265//nucleoside phosphate binding;GO:0005488//binding;GO:0036094//small molecule binding;GO:1901363//heterocyclic compound binding;GO:0003824//catalytic activity;GO:0097159//organic cyclic compound binding;GO:0000166//nucleotide binding	GO:0044255//cellular lipid metabolic process;GO:0044237//cellular metabolic process;GO:0008152//metabolic process;GO:0071704//organic substance metabolic process;GO:0043436//oxoacid metabolic process;GO:0006629//lipid metabolic process;GO:0044710//single-organism metabolic process;GO:0044763//single-organism cellular process;GO:0009987//cellular process;GO:0032787//monocarboxylic acid metabolic p…
Gene001136	CIL1320S0033	Isoform002421	CIL1320S0033	new	CLS	cardiolipin synthase, mitochondrial; K08744 cardiolipin synthase [EC:2.7.8.-]	Metabolism	Global and Overview;Lipid metabolism	ko01100//Metabolic pathways;ko00564//Glycerophospholipid metabolism	K08744	-	GO:0003824//catalytic activity;GO:0016740//transferase activity;GO:0016780//phosphotransferase activity, for other substituted phosphate groups;GO:0016772//transferase activity, transferring phosphorus-containing groups	-
Gene003768	CIL1502S0026	Isoform008248	CIL1502S0026	new	CNF02430	acyl-protein thioesterase 2-like; K06130 lysophospholipase II [EC:3.1.1.5]	Metabolism	Lipid metabolism	ko00564//Glycerophospholipid metabolism	K06130	-	-	-
Gene010958	CIL1029S0076	Isoform024371	CIL1029S0076	new	CPI1	cycloeucalenol cycloisomerase-like; K08246 cycloeucalenol cycloisomerase [EC:5.5.1.9]	Metabolism	Global and Overview;Lipid metabolism	ko01100//Metabolic pathways;ko01110//Biosynthesis of secondary metabolites;ko00100//Steroid biosynthesis	K08246	-	GO:0003824//catalytic activity;GO:0016853//isomerase activity;GO:0016872//intramolecular lyase activity	-
Gene010958	CIL1029S0076	Isoform024372	CIL1029S0076	new	CPI1	cycloeucalenol cycloisomerase; K08246 cycloeucalenol cycloisomerase [EC:5.5.1.9]	Metabolism	Lipid metabolism;Global and Overview	ko01100//Metabolic pathways;ko01110//Biosynthesis of secondary metabolites;ko00100//Steroid biosynthesis	K08246	-	GO:0016872//intramolecular lyase activity;GO:0016853//isomerase activity;GO:0003824//catalytic activity	-
Gene010958	CIL1029S0076	Isoform024373	CIL1029S0076	new	CPI1	cycloeucalenol cycloisomerase; K08246 cycloeucalenol cycloisomerase [EC:5.5.1.9]	Metabolism	Lipid metabolism;Global and Overview	ko01100//Metabolic pathways;ko01110//Biosynthesis of secondary metabolites;ko00100//Steroid biosynthesis	K08246	-	GO:0016853//isomerase activity;GO:0003824//catalytic activity	-
Gene010958	CIL1029S0076	Isoform024374	CIL1029S0076	new	CPI1	cycloeucalenol cycloisomerase; K08246 cycloeucalenol cycloisomerase [EC:5.5.1.9]	Metabolism	Global and Overview;Lipid metabolism	ko01100//Metabolic pathways;ko01110//Biosynthesis of secondary metabolites;ko00100//Steroid biosynthesis	K08246	-	GO:0016853//isomerase activity;GO:0016872//intramolecular lyase activity;GO:0003824//catalytic activity	-
Gene014655	CIL1157S0099	Isoform032859	CIL1157S0099	new	CPI1	cycloeucalenol cycloisomerase; K08246 cycloeucalenol cycloisomerase [EC:5.5.1.9]	Metabolism	Global and Overview;Lipid metabolism	ko01100//Metabolic pathways;ko01110//Biosynthesis of secondary metabolites;ko00100//Steroid biosynthesis	K08246	-	GO:0003824//catalytic activity;GO:0016872//intramolecular lyase activity;GO:0016853//isomerase activity	-
Gene014655	CIL1157S0099	Isoform032860	CIL1157S0099	new	CPI1	cycloeucalenol cycloisomerase; K08246 cycloeucalenol cycloisomerase [EC:5.5.1.9]	Metabolism	Lipid metabolism;Global and Overview	ko01100//Metabolic pathways;ko01110//Biosynthesis of secondary metabolites;ko00100//Steroid biosynthesis	K08246	-	-	-
Gene014655	CIL1157S0099	Isoform032861	CIL1157S0099	new	CPI1	cycloeucalenol cycloisomerase; K08246 cycloeucalenol cycloisomerase [EC:5.5.1.9]	Metabolism	Lipid metabolism;Global and Overview	ko01100//Metabolic pathways;ko01110//Biosynthesis of secondary metabolites;ko00100//Steroid biosynthesis	K08246	-	GO:0003824//catalytic activity	-
Gene014318	CIL1148S0019	Isoform031943	CIL1148S0019	new	CS4	7-methylxanthosine synthase 1-like	Metabolism	Lipid metabolism;Global and Overview	ko01110//Biosynthesis of secondary metabolites;ko00592//alpha-Linolenic acid metabolism	K08241	-	-	GO:0008152//metabolic process
Gene015584	CIL1197S0036	Isoform034915	CIL1197S0036	new	CSA	Glutathione peroxidase 6; K00432 glutathione peroxidase [EC:1.11.1.9]	Metabolism	Metabolism of other amino acids;Lipid metabolism	ko00480//Glutathione metabolism;ko00590//Arachidonic acid metabolism	K00432	GO:0005623//cell;GO:0044444//cytoplasmic part;GO:0043231//intracellular membrane-bounded organelle;GO:0043229//intracellular organelle;GO:0043226//organelle;GO:0043227//membrane-bounded organelle;GO:0044464//cell part;GO:0009536//plastid;GO:0016020//membrane;GO:0005737//cytoplasm;GO:0005576//extracellular region;GO:0044424//intracellular part;GO:0005622//intracellular	GO:0016209//antioxidant activity;GO:0004601//peroxidase activity;GO:0016491//oxidoreductase activity;GO:0003824//catalytic activity;GO:0016684//oxidoreductase activity, acting on peroxide as acceptor	GO:0050896//response to stimulus;GO:0006950//response to stress;GO:0009987//cellular process;GO:0044699//single-organism process;GO:0071840//cellular component organization or biogenesis;GO:0009404//toxin metabolic process;GO:0019748//secondary metabolic process;GO:0006996//organelle organization;GO:0051276//chromosome organization;GO:0044710//single-organism metabolic process;GO:0006325//chromat…
Gene001681	CIL1348S0037	Isoform003671	CIL1348S0037	known	CSE	PREDICTED: caffeoylshikimate esterase-like [Juglans regia]	Metabolism	Global and Overview;Lipid metabolism	ko01100//Metabolic pathways;ko00561//Glycerolipid metabolism	K01054	-	GO:0003824//catalytic activity	-
Gene004251	CIL1546S0022	Isoform009255	CIL1546S0022	known	CSE	PREDICTED: caffeoylshikimate esterase-like [Juglans regia]	Metabolism	Lipid metabolism;Global and Overview	ko01100//Metabolic pathways;ko00561//Glycerolipid metabolism	K01054	-	GO:0003824//catalytic activity	-
Gene015491	CIL1196S0005	Isoform034715	CIL1196S0005	new	CYP51G1	POPTRDRAFT_48605; cytochrome p450 51 family protein; K05917 sterol 14-demethylase [EC:1.14.13.70]	Metabolism	Global and Overview;Lipid metabolism	ko01100//Metabolic pathways;ko01110//Biosynthesis of secondary metabolites;ko01130//Biosynthesis of antibiotics;ko00100//Steroid biosynthesis	K05917	GO:0044464//cell part;GO:0043227//membrane-bounded organelle;GO:0005623//cell;GO:0043229//intracellular organelle;GO:0005622//intracellular;GO:0044424//intracellular part;GO:0043231//intracellular membrane-bounded organelle;GO:0016020//membrane;GO:0043226//organelle;GO:0031224//intrinsic component of membrane;GO:0044425//membrane part	GO:0046872//metal ion binding;GO:0046906//tetrapyrrole binding;GO:0046914//transition metal ion binding;GO:0043169//cation binding;GO:0016491//oxidoreductase activity;GO:0016740//transferase activity;GO:0005488//binding;GO:1901363//heterocyclic compound binding;GO:0016705//oxidoreductase activity, acting on paired donors, with incorporation or reduction of molecular oxygen;GO:0097159//organic cyc…	GO:0006722//triterpenoid metabolic process;GO:1901564//organonitrogen compound metabolic process;GO:0006694//steroid biosynthetic process;GO:0044763//single-organism cellular process;GO:0046394//carboxylic acid biosynthetic process;GO:0071704//organic substance metabolic process;GO:0008610//lipid biosynthetic process;GO:0044283//small molecule biosynthetic process;GO:0006790//sulfur compound meta…
Gene015491	CIL1196S0005	Isoform034716	CIL1196S0005	new	CYP51G1	sterol 14-demethylase-like; K05917 sterol 14-demethylase [EC:1.14.13.70]	Metabolism	Lipid metabolism;Global and Overview	ko01100//Metabolic pathways;ko01110//Biosynthesis of secondary metabolites;ko01130//Biosynthesis of antibiotics;ko00100//Steroid biosynthesis	K05917	-	-	-
Gene002232	CIL1391S0014	Isoform004955	CIL1391S0014	new	CYP74B2	POPTRDRAFT_688325; hydroperoxide lyase family protein; K10528 hydroperoxide lyase [EC:4.1.2.-]	Metabolism	Lipid metabolism;Global and Overview	ko01110//Biosynthesis of secondary metabolites;ko00592//alpha-Linolenic acid metabolism	K10528	-	GO:0043169//cation binding;GO:0046906//tetrapyrrole binding;GO:0016835//carbon-oxygen lyase activity;GO:0016491//oxidoreductase activity;GO:0046872//metal ion binding;GO:0016829//lyase activity;GO:0005488//binding;GO:0046914//transition metal ion binding;GO:0003824//catalytic activity;GO:0097159//organic cyclic compound binding;GO:0016836//hydro-lyase activity;GO:0043167//ion binding;GO:1901363//…	GO:0008152//metabolic process;GO:0044699//single-organism process;GO:0044710//single-organism metabolic process
Gene001138	CIL1320S0037	Isoform002427	CIL1320S0037	known	CYP77A3	PREDICTED: cytochrome P450 77A1 [Juglans regia]	Metabolism	Amino acid metabolism;Lipid metabolism;Biosynthesis of other secondary metabolites;Global and Overview	ko01100//Metabolic pathways;ko01110//Biosynthesis of secondary metabolites;ko00380//Tryptophan metabolism;ko00591//Linoleic acid metabolism;ko00232//Caffeine metabolism	K07409	GO:0016020//membrane	GO:0046872//metal ion binding;GO:1901363//heterocyclic compound binding;GO:0016491//oxidoreductase activity;GO:0046906//tetrapyrrole binding;GO:0043167//ion binding;GO:0003824//catalytic activity;GO:0043169//cation binding;GO:0046914//transition metal ion binding;GO:0005488//binding;GO:0097159//organic cyclic compound binding	GO:0044710//single-organism metabolic process;GO:0008152//metabolic process;GO:0044699//single-organism process
Gene009745	CIL0982S0003	Isoform021713	CIL0982S0003	new	CYP86A8	cytochrome P450 86A2-like; K15398 fatty acid omega-hydroxylase [EC:1.14.-.-]	Metabolism	Global and Overview;Lipid metabolism	ko01100//Metabolic pathways;ko00073//Cutin, suberine and wax biosynthesis	K15398	-	GO:0043167//ion binding;GO:0046872//metal ion binding;GO:0043169//cation binding;GO:0046914//transition metal ion binding;GO:1901363//heterocyclic compound binding;GO:0003824//catalytic activity;GO:0016491//oxidoreductase activity;GO:0005488//binding;GO:0046906//tetrapyrrole binding;GO:0097159//organic cyclic compound binding	GO:0044699//single-organism process;GO:0008152//metabolic process;GO:0044710//single-organism metabolic process
Gene007290	CIL0908S0099	Isoform016022	CIL0908S0099	new	Dak	dihydroxyacetone kinase family protein; K00863 dihydroxyacetone kinase [EC:2.7.1.29]	Metabolism	Global and Overview;Lipid metabolism	ko01100//Metabolic pathways;ko01120//Microbial metabolism in diverse environments;ko01200//Carbon metabolism;ko00561//Glycerolipid metabolism	K00863	-	-	-
Gene007290	CIL0908S0099	Isoform016023	CIL0908S0099	new	Dak	dihydroxyacetone kinase family protein; K00863 dihydroxyacetone kinase [EC:2.7.1.29]	Metabolism	Lipid metabolism;Global and Overview	ko01100//Metabolic pathways;ko01120//Microbial metabolism in diverse environments;ko01200//Carbon metabolism;ko00561//Glycerolipid metabolism	K00863	-	-	-
Gene015814	CIL1211S0036	Isoform035438	CIL1211S0036	new	DGAT1	diacylglycerol O-acyltransferase 1; K11155 diacylglycerol O-acyltransferase 1 [EC:2.3.1.20 2.3.1.75 2.3.1.76]	Metabolism	Global and Overview;Lipid metabolism	ko01100//Metabolic pathways;ko00561//Glycerolipid metabolism	K11155	GO:0043231//intracellular membrane-bounded organelle;GO:0031090//organelle membrane;GO:0031224//intrinsic component of membrane;GO:0044464//cell part;GO:0044424//intracellular part;GO:0005622//intracellular;GO:0005623//cell;GO:0044422//organelle part;GO:0044425//membrane part;GO:0043227//membrane-bounded organelle;GO:0016020//membrane;GO:0043226//organelle;GO:0043229//intracellular organelle	GO:0016746//transferase activity, transferring acyl groups;GO:0016740//transferase activity;GO:0003824//catalytic activity;GO:0016747//transferase activity, transferring acyl groups other than amino-acyl groups;GO:0016411//acylglycerol O-acyltransferase activity;GO:0008374//O-acyltransferase activity	GO:0044237//cellular metabolic process;GO:0044699//single-organism process;GO:0008152//metabolic process;GO:0046486//glycerolipid metabolic process;GO:0044710//single-organism metabolic process;GO:0071704//organic substance metabolic process;GO:0044763//single-organism cellular process;GO:0044238//primary metabolic process;GO:0006639//acylglycerol metabolic process;GO:0009987//cellular process;GO…
Gene015814	CIL1211S0036	Isoform035439	CIL1211S0036	new	DGAT1	diacylglycerol O-acyltransferase 1; K11155 diacylglycerol O-acyltransferase 1 [EC:2.3.1.20 2.3.1.75 2.3.1.76]	Metabolism	Lipid metabolism;Global and Overview	ko01100//Metabolic pathways;ko00561//Glycerolipid metabolism	K11155	GO:0031090//organelle membrane;GO:0043231//intracellular membrane-bounded organelle;GO:0031224//intrinsic component of membrane;GO:0044424//intracellular part;GO:0005623//cell;GO:0016020//membrane;GO:0005622//intracellular;GO:0043229//intracellular organelle;GO:0044425//membrane part;GO:0044464//cell part;GO:0044422//organelle part;GO:0043226//organelle;GO:0043227//membrane-bounded organelle	GO:0016747//transferase activity, transferring acyl groups other than amino-acyl groups;GO:0008374//O-acyltransferase activity;GO:0003824//catalytic activity;GO:0016746//transferase activity, transferring acyl groups;GO:0016740//transferase activity;GO:0016411//acylglycerol O-acyltransferase activity	GO:0044255//cellular lipid metabolic process;GO:0006639//acylglycerol metabolic process;GO:0044699//single-organism process;GO:0006638//neutral lipid metabolic process;GO:0044710//single-organism metabolic process;GO:0009987//cellular process;GO:0046486//glycerolipid metabolic process;GO:0006629//lipid metabolic process;GO:0044237//cellular metabolic process;GO:0044238//primary metabolic process;…
Gene015814	CIL1211S0036	Isoform035440	CIL1211S0036	new	DGAT1	diacylglycerol O-acyltransferase 1; K11155 diacylglycerol O-acyltransferase 1 [EC:2.3.1.20 2.3.1.75 2.3.1.76]	Metabolism	Lipid metabolism;Global and Overview	ko01100//Metabolic pathways;ko00561//Glycerolipid metabolism	K11155	-	-	-
Gene000300	CIL1268S0007	Isoform000592	CIL1268S0007	new	DGAT2	Diacylglycerol O-acyltransferase; K14457 2-acylglycerol O-acyltransferase 2 [EC:2.3.1.22]	Metabolism	Lipid metabolism	ko00561//Glycerolipid metabolism	K14457	-	-	-
Gene010476	CIL1006S0096	Isoform023319	CIL1006S0096	new	DGD1	UDP-Glycosyltransferase superfamily protein isoform 1; K09480 digalactosyldiacylglycerol synthase [EC:2.4.1.241]	Metabolism	Lipid metabolism;Global and Overview	ko01100//Metabolic pathways;ko00561//Glycerolipid metabolism	K09480	GO:0005623//cell;GO:0044435//plastid part;GO:0031410//cytoplasmic vesicle;GO:0012506//vesicle membrane;GO:0044446//intracellular organelle part;GO:0005622//intracellular;GO:0031982//vesicle;GO:0030659//cytoplasmic vesicle membrane;GO:0016023//cytoplasmic, membrane-bounded vesicle;GO:0009536//plastid;GO:0019867//outer membrane;GO:0005737//cytoplasm;GO:0043229//intracellular organelle;GO:0009526//p…	GO:0035250//UDP-galactosyltransferase activity;GO:0003824//catalytic activity;GO:0016740//transferase activity;GO:0016757//transferase activity, transferring glycosyl groups;GO:0008194//UDP-glycosyltransferase activity;GO:0008378//galactosyltransferase activity;GO:0016758//transferase activity, transferring hexosyl groups	GO:0044281//small molecule metabolic process;GO:0044271//cellular nitrogen compound biosynthetic process;GO:0071704//organic substance metabolic process;GO:0044249//cellular biosynthetic process;GO:0044237//cellular metabolic process;GO:0051716//cellular response to stimulus;GO:0033014//tetrapyrrole biosynthetic process;GO:0016109//tetraterpenoid biosynthetic process;GO:0046486//glycerolipid meta…
Gene010476	CIL1006S0096	Isoform023320	CIL1006S0096	new	DGD1	digalactosyldiacylglycerol synthase 1, chloroplastic-like; K09480 digalactosyldiacylglycerol synthase [EC:2.4.1.241]	Metabolism	Lipid metabolism;Global and Overview	ko01100//Metabolic pathways;ko00561//Glycerolipid metabolism	K09480	GO:0044435//plastid part;GO:0044424//intracellular part;GO:0031090//organelle membrane;GO:0031982//vesicle;GO:0016020//membrane;GO:0031968//organelle outer membrane;GO:0009526//plastid envelope;GO:0031988//membrane-bounded vesicle;GO:0005622//intracellular;GO:0044446//intracellular organelle part;GO:0044433//cytoplasmic vesicle part;GO:0043227//membrane-bounded organelle;GO:0098588//bounding memb…	GO:0008194//UDP-glycosyltransferase activity;GO:0035250//UDP-galactosyltransferase activity;GO:0003824//catalytic activity;GO:0016740//transferase activity;GO:0008378//galactosyltransferase activity;GO:0016757//transferase activity, transferring glycosyl groups;GO:0016758//transferase activity, transferring hexosyl groups	GO:0033013//tetrapyrrole metabolic process;GO:0031323//regulation of cellular metabolic process;GO:1901360//organic cyclic compound metabolic process;GO:0006633//fatty acid biosynthetic process;GO:0019637//organophosphate metabolic process;GO:0008299//isoprenoid biosynthetic process;GO:1901576//organic substance biosynthetic process;GO:0072330//monocarboxylic acid biosynthetic process;GO:0006796/…
Gene010476	CIL1006S0096	Isoform023321	CIL1006S0096	new	DGD1	UDP-Glycosyltransferase superfamily protein isoform 1; K09480 digalactosyldiacylglycerol synthase [EC:2.4.1.241]	Metabolism	Global and Overview;Lipid metabolism	ko01100//Metabolic pathways;ko00561//Glycerolipid metabolism	K09480	GO:0031968//organelle outer membrane;GO:0044464//cell part;GO:0043229//intracellular organelle;GO:0009527//plastid outer membrane;GO:0043231//intracellular membrane-bounded organelle;GO:0031988//membrane-bounded vesicle;GO:0019867//outer membrane;GO:0012506//vesicle membrane;GO:0009526//plastid envelope;GO:0044422//organelle part;GO:0098588//bounding membrane of organelle;GO:0031975//envelope;GO:…	GO:0016758//transferase activity, transferring hexosyl groups;GO:0008194//UDP-glycosyltransferase activity;GO:0016740//transferase activity;GO:0035250//UDP-galactosyltransferase activity;GO:0008378//galactosyltransferase activity;GO:0003824//catalytic activity;GO:0016757//transferase activity, transferring glycosyl groups	GO:0071496//cellular response to external stimulus;GO:0044763//single-organism cellular process;GO:0044255//cellular lipid metabolic process;GO:0006796//phosphate-containing compound metabolic process;GO:1901137//carbohydrate derivative biosynthetic process;GO:0008152//metabolic process;GO:0051716//cellular response to stimulus;GO:0043436//oxoacid metabolic process;GO:1901566//organonitrogen comp…
Gene014031	CIL1142S0011	Isoform031229	CIL1142S0011	new	DGD2	digalactosyldiacylglycerol synthase 2, chloroplastic; K09480 digalactosyldiacylglycerol synthase [EC:2.4.1.241]	Metabolism	Global and Overview;Lipid metabolism	ko01100//Metabolic pathways;ko00561//Glycerolipid metabolism	K09480	-	GO:0016740//transferase activity;GO:0003824//catalytic activity	-
Gene007398	CIL0909S0083	Isoform016286	CIL0909S0083	new	DGK1	Diacylglycerol kinase 1 isoform 3; K00901 diacylglycerol kinase (ATP) [EC:2.7.1.107]	Environmental Information Processing;Metabolism	Global and Overview;Lipid metabolism;Signal transduction	ko01100//Metabolic pathways;ko01110//Biosynthesis of secondary metabolites;ko00564//Glycerophospholipid metabolism;ko00561//Glycerolipid metabolism;ko04070//Phosphatidylinositol signaling system	K00901	GO:0031224//intrinsic component of membrane;GO:0016020//membrane;GO:0044425//membrane part	GO:0001882//nucleoside binding;GO:0043169//cation binding;GO:0043167//ion binding;GO:0032550//purine ribonucleoside binding;GO:0003824//catalytic activity;GO:0001883//purine nucleoside binding;GO:0016740//transferase activity;GO:0016301//kinase activity;GO:0046872//metal ion binding;GO:0016772//transferase activity, transferring phosphorus-containing groups;GO:0032549//ribonucleoside binding;GO:0…	GO:0051716//cellular response to stimulus;GO:0007186//G-protein coupled receptor signaling pathway;GO:0023052//signaling;GO:0050794//regulation of cellular process;GO:0006796//phosphate-containing compound metabolic process;GO:0044763//single-organism cellular process;GO:0007165//signal transduction;GO:0050789//regulation of biological process;GO:0006793//phosphorus metabolic process;GO:0065007//…
Gene007398	CIL0909S0083	Isoform016287	CIL0909S0083	new	DGK1	diacylglycerol kinase 1-like; K00901 diacylglycerol kinase (ATP) [EC:2.7.1.107]	Environmental Information Processing;Metabolism	Signal transduction;Lipid metabolism;Global and Overview	ko01100//Metabolic pathways;ko01110//Biosynthesis of secondary metabolites;ko00564//Glycerophospholipid metabolism;ko00561//Glycerolipid metabolism;ko04070//Phosphatidylinositol signaling system	K00901	GO:0044425//membrane part;GO:0031224//intrinsic component of membrane;GO:0016020//membrane	GO:0016772//transferase activity, transferring phosphorus-containing groups;GO:1901363//heterocyclic compound binding;GO:0001883//purine nucleoside binding;GO:0032549//ribonucleoside binding;GO:0097367//carbohydrate derivative binding;GO:0016301//kinase activity;GO:0032550//purine ribonucleoside binding;GO:0016740//transferase activity;GO:0001882//nucleoside binding;GO:0097159//organic cyclic com…	GO:0007165//signal transduction;GO:0023052//signaling;GO:0050896//response to stimulus;GO:0051716//cellular response to stimulus;GO:0007154//cell communication;GO:0006950//response to stress;GO:0050794//regulation of cellular process;GO:0044699//single-organism process;GO:0006793//phosphorus metabolic process;GO:0065007//biological regulation;GO:0044700//single organism signaling;GO:0009987//cell…
Gene000039	CIL0114S0011	Isoform000080	CIL0114S0011	new	DGK2	diacylglycerol kinase 2; K00901 diacylglycerol kinase (ATP) [EC:2.7.1.107]	Environmental Information Processing;Metabolism	Lipid metabolism;Signal transduction;Global and Overview	ko01100//Metabolic pathways;ko01110//Biosynthesis of secondary metabolites;ko00564//Glycerophospholipid metabolism;ko00561//Glycerolipid metabolism;ko04070//Phosphatidylinositol signaling system	K00901	GO:0043227//membrane-bounded organelle;GO:0044425//membrane part;GO:0044464//cell part;GO:0044424//intracellular part;GO:0043229//intracellular organelle;GO:0043226//organelle;GO:0043231//intracellular membrane-bounded organelle;GO:0005623//cell;GO:0005622//intracellular;GO:0016020//membrane;GO:0031224//intrinsic component of membrane	GO:0003824//catalytic activity;GO:0036094//small molecule binding;GO:0043167//ion binding;GO:0043169//cation binding;GO:0097159//organic cyclic compound binding;GO:1901363//heterocyclic compound binding;GO:0016301//kinase activity;GO:0032549//ribonucleoside binding;GO:0001882//nucleoside binding;GO:0032550//purine ribonucleoside binding;GO:0016772//transferase activity, transferring phosphorus-co…	GO:0009791//post-embryonic development;GO:0006950//response to stress;GO:0051234//establishment of localization;GO:0048827//phyllome development;GO:0065007//biological regulation;GO:0051179//localization;GO:0007186//G-protein coupled receptor signaling pathway;GO:0048364//root development;GO:0006810//transport;GO:0032501//multicellular organismal process;GO:0048569//post-embryonic organ developme…
Gene000039	CIL0114S0011	Isoform000081	CIL0114S0011	new	DGK2	diacylglycerol kinase 2; K00901 diacylglycerol kinase (ATP) [EC:2.7.1.107]	Metabolism;Environmental Information Processing	Lipid metabolism;Signal transduction;Global and Overview	ko01100//Metabolic pathways;ko01110//Biosynthesis of secondary metabolites;ko00564//Glycerophospholipid metabolism;ko00561//Glycerolipid metabolism;ko04070//Phosphatidylinositol signaling system	K00901	-	-	-
Gene000039	CIL0114S0011	Isoform000082	CIL0114S0011	new	DGK2	diacylglycerol kinase 2; K00901 diacylglycerol kinase (ATP) [EC:2.7.1.107]	Environmental Information Processing;Metabolism	Signal transduction;Lipid metabolism;Global and Overview	ko01100//Metabolic pathways;ko01110//Biosynthesis of secondary metabolites;ko00564//Glycerophospholipid metabolism;ko00561//Glycerolipid metabolism;ko04070//Phosphatidylinositol signaling system	K00901	GO:0016020//membrane;GO:0043226//organelle;GO:0043231//intracellular membrane-bounded organelle;GO:0031224//intrinsic component of membrane;GO:0043229//intracellular organelle;GO:0044424//intracellular part;GO:0043227//membrane-bounded organelle;GO:0005622//intracellular;GO:0044425//membrane part;GO:0005623//cell;GO:0044464//cell part	GO:0001883//purine nucleoside binding;GO:0016740//transferase activity;GO:0043167//ion binding;GO:0016301//kinase activity;GO:0036094//small molecule binding;GO:0032550//purine ribonucleoside binding;GO:0032549//ribonucleoside binding;GO:0016772//transferase activity, transferring phosphorus-containing groups;GO:1901363//heterocyclic compound binding;GO:0097367//carbohydrate derivative binding;GO…	GO:0007165//signal transduction;GO:0032502//developmental process;GO:0008152//metabolic process;GO:0006793//phosphorus metabolic process;GO:0044699//single-organism process;GO:0007275//multicellular organism development;GO:0016192//vesicle-mediated transport;GO:0044763//single-organism cellular process;GO:0048528//post-embryonic root development;GO:0048367//shoot system development;GO:0048513//an…
Gene015660	CIL1203S0018	Isoform035093	CIL1203S0018	new	DGK4	diacylglycerol kinase 3; K00901 diacylglycerol kinase (ATP) [EC:2.7.1.107]	Environmental Information Processing;Metabolism	Global and Overview;Signal transduction;Lipid metabolism	ko01100//Metabolic pathways;ko01110//Biosynthesis of secondary metabolites;ko00564//Glycerophospholipid metabolism;ko00561//Glycerolipid metabolism;ko04070//Phosphatidylinositol signaling system	K00901	-	-	-
Gene015682	CIL1204S0038	Isoform035145	CIL1204S0038	new	DGK4	diacylglycerol kinase 4-like; K00901 diacylglycerol kinase (ATP) [EC:2.7.1.107]	Metabolism;Environmental Information Processing	Signal transduction;Lipid metabolism;Global and Overview	ko01100//Metabolic pathways;ko01110//Biosynthesis of secondary metabolites;ko00564//Glycerophospholipid metabolism;ko00561//Glycerolipid metabolism;ko04070//Phosphatidylinositol signaling system	K00901	-	GO:0016301//kinase activity;GO:0036094//small molecule binding;GO:0001883//purine nucleoside binding;GO:0003824//catalytic activity;GO:0016772//transferase activity, transferring phosphorus-containing groups;GO:1901363//heterocyclic compound binding;GO:0032549//ribonucleoside binding;GO:0001882//nucleoside binding;GO:0016740//transferase activity;GO:0032550//purine ribonucleoside binding;GO:00054…	GO:0050789//regulation of biological process;GO:0007154//cell communication;GO:0009987//cellular process;GO:0023052//signaling;GO:0050896//response to stimulus;GO:0044237//cellular metabolic process;GO:0007165//signal transduction;GO:0065007//biological regulation;GO:0007186//G-protein coupled receptor signaling pathway;GO:0051716//cellular response to stimulus;GO:0044699//single-organism process…
Gene008783	CIL0946S0109	Isoform019375	CIL0946S0109	new	DGK5	diacylglycerol kinase 5; K00901 diacylglycerol kinase (ATP) [EC:2.7.1.107]	Environmental Information Processing;Metabolism	Global and Overview;Lipid metabolism;Signal transduction	ko01100//Metabolic pathways;ko01110//Biosynthesis of secondary metabolites;ko00564//Glycerophospholipid metabolism;ko00561//Glycerolipid metabolism;ko04070//Phosphatidylinositol signaling system	K00901	-	-	-
Gene013836	CIL1135S0043	Isoform030849	CIL1135S0043	new	DGK5	diacylglycerol kinase 5-like; K00901 diacylglycerol kinase (ATP) [EC:2.7.1.107]	Environmental Information Processing;Metabolism	Global and Overview;Lipid metabolism;Signal transduction	ko01100//Metabolic pathways;ko01110//Biosynthesis of secondary metabolites;ko00564//Glycerophospholipid metabolism;ko00561//Glycerolipid metabolism;ko04070//Phosphatidylinositol signaling system	K00901	-	GO:0036094//small molecule binding;GO:0032550//purine ribonucleoside binding;GO:1901363//heterocyclic compound binding;GO:0016740//transferase activity;GO:0001882//nucleoside binding;GO:0001883//purine nucleoside binding;GO:0097367//carbohydrate derivative binding;GO:0097159//organic cyclic compound binding;GO:0005488//binding;GO:0003824//catalytic activity;GO:0016772//transferase activity, trans…	GO:0009987//cellular process;GO:0023052//signaling;GO:0007165//signal transduction;GO:0044699//single-organism process;GO:0008152//metabolic process;GO:0050794//regulation of cellular process;GO:0044237//cellular metabolic process;GO:0007154//cell communication;GO:0051716//cellular response to stimulus;GO:0065007//biological regulation;GO:0006793//phosphorus metabolic process;GO:0007186//G-protei…
Gene013836	CIL1135S0043	Isoform030850	CIL1135S0043	new	DGK5	diacylglycerol kinase 5; K00901 diacylglycerol kinase (ATP) [EC:2.7.1.107]	Environmental Information Processing;Metabolism	Global and Overview;Signal transduction;Lipid metabolism	ko01100//Metabolic pathways;ko01110//Biosynthesis of secondary metabolites;ko00564//Glycerophospholipid metabolism;ko00561//Glycerolipid metabolism;ko04070//Phosphatidylinositol signaling system	K00901	-	GO:0001883//purine nucleoside binding;GO:1901363//heterocyclic compound binding;GO:0032550//purine ribonucleoside binding;GO:0005488//binding;GO:0016740//transferase activity;GO:0016301//kinase activity;GO:0036094//small molecule binding;GO:0016772//transferase activity, transferring phosphorus-containing groups;GO:0003824//catalytic activity;GO:0097367//carbohydrate derivative binding;GO:0001882…	GO:0023052//signaling;GO:0050794//regulation of cellular process;GO:0006796//phosphate-containing compound metabolic process;GO:0010033//response to organic substance;GO:0044763//single-organism cellular process;GO:0007165//signal transduction;GO:0050896//response to stimulus;GO:0009987//cellular process;GO:0042221//response to chemical;GO:0044700//single organism signaling;GO:0065007//biological…
Gene013836	CIL1135S0043	Isoform030851	CIL1135S0043	new	DGK5	diacylglycerol kinase 5-like; K00901 diacylglycerol kinase (ATP) [EC:2.7.1.107]	Environmental Information Processing;Metabolism	Global and Overview;Lipid metabolism;Signal transduction	ko01100//Metabolic pathways;ko01110//Biosynthesis of secondary metabolites;ko00564//Glycerophospholipid metabolism;ko00561//Glycerolipid metabolism;ko04070//Phosphatidylinositol signaling system	K00901	-	GO:0003824//catalytic activity;GO:0097159//organic cyclic compound binding;GO:0005488//binding;GO:0036094//small molecule binding;GO:0016740//transferase activity;GO:0032550//purine ribonucleoside binding;GO:0032549//ribonucleoside binding;GO:0097367//carbohydrate derivative binding;GO:0016301//kinase activity;GO:0016772//transferase activity, transferring phosphorus-containing groups;GO:0001882/…	GO:0007165//signal transduction;GO:0006796//phosphate-containing compound metabolic process;GO:0044700//single organism signaling;GO:0065007//biological regulation;GO:0009987//cellular process;GO:0023052//signaling;GO:0050789//regulation of biological process;GO:0044763//single-organism cellular process;GO:0007186//G-protein coupled receptor signaling pathway;GO:0044237//cellular metabolic proces…
Gene013836	CIL1135S0043	Isoform030852	CIL1135S0043	new	DGK5	diacylglycerol kinase 5-like; K00901 diacylglycerol kinase (ATP) [EC:2.7.1.107]	Metabolism;Environmental Information Processing	Global and Overview;Signal transduction;Lipid metabolism	ko01100//Metabolic pathways;ko01110//Biosynthesis of secondary metabolites;ko00564//Glycerophospholipid metabolism;ko00561//Glycerolipid metabolism;ko04070//Phosphatidylinositol signaling system	K00901	-	GO:0005488//binding;GO:0097367//carbohydrate derivative binding;GO:1901363//heterocyclic compound binding;GO:0036094//small molecule binding;GO:0001882//nucleoside binding;GO:0032549//ribonucleoside binding;GO:0016301//kinase activity;GO:0032550//purine ribonucleoside binding;GO:0016772//transferase activity, transferring phosphorus-containing groups;GO:0097159//organic cyclic compound binding;GO…	GO:0023052//signaling;GO:0008152//metabolic process;GO:0009987//cellular process;GO:0006793//phosphorus metabolic process;GO:0044699//single-organism process;GO:0051716//cellular response to stimulus;GO:0007165//signal transduction;GO:0050794//regulation of cellular process;GO:0050789//regulation of biological process;GO:0050896//response to stimulus;GO:0044700//single organism signaling;GO:00650…
Gene013836	CIL1135S0043	Isoform030853	CIL1135S0043	new	DGK5	diacylglycerol kinase 5-like; K00901 diacylglycerol kinase (ATP) [EC:2.7.1.107]	Environmental Information Processing;Metabolism	Lipid metabolism;Signal transduction;Global and Overview	ko01100//Metabolic pathways;ko01110//Biosynthesis of secondary metabolites;ko00564//Glycerophospholipid metabolism;ko00561//Glycerolipid metabolism;ko04070//Phosphatidylinositol signaling system	K00901	-	GO:0005488//binding;GO:1901363//heterocyclic compound binding;GO:0097367//carbohydrate derivative binding;GO:0003824//catalytic activity;GO:0016301//kinase activity;GO:0032549//ribonucleoside binding;GO:0016740//transferase activity;GO:0001882//nucleoside binding;GO:0036094//small molecule binding;GO:0016772//transferase activity, transferring phosphorus-containing groups;GO:0032550//purine ribon…	GO:0007154//cell communication;GO:0006796//phosphate-containing compound metabolic process;GO:0065007//biological regulation;GO:0044699//single-organism process;GO:0044763//single-organism cellular process;GO:0050896//response to stimulus;GO:0008152//metabolic process;GO:0007186//G-protein coupled receptor signaling pathway;GO:0050789//regulation of biological process;GO:0050794//regulation of ce…
Gene013843	CIL1135S0008	Isoform030869	CIL1135S0008	new	DIM	delta(24)-sterol reductase; K09828 delta24-sterol reductase [EC:1.3.1.72]	Metabolism	Lipid metabolism;Global and Overview	ko01100//Metabolic pathways;ko01110//Biosynthesis of secondary metabolites;ko00100//Steroid biosynthesis	K09828	-	GO:0016616//oxidoreductase activity, acting on the CH-OH group of donors, NAD or NADP as acceptor;GO:1901363//heterocyclic compound binding;GO:0036094//small molecule binding;GO:1901265//nucleoside phosphate binding;GO:0005488//binding;GO:0000166//nucleotide binding;GO:0016614//oxidoreductase activity, acting on CH-OH group of donors;GO:0003824//catalytic activity;GO:0097159//organic cyclic compo…	GO:0044710//single-organism metabolic process;GO:0008152//metabolic process;GO:0044699//single-organism process
Gene013843	CIL1135S0008	Isoform030870	CIL1135S0008	new	DIM	delta(24)-sterol reductase; K09828 delta24-sterol reductase [EC:1.3.1.72]	Metabolism	Global and Overview;Lipid metabolism	ko01100//Metabolic pathways;ko01110//Biosynthesis of secondary metabolites;ko00100//Steroid biosynthesis	K09828	-	GO:0000166//nucleotide binding;GO:1901265//nucleoside phosphate binding;GO:0036094//small molecule binding;GO:1901363//heterocyclic compound binding;GO:0016614//oxidoreductase activity, acting on CH-OH group of donors;GO:0016491//oxidoreductase activity;GO:0003824//catalytic activity;GO:0005488//binding;GO:0016616//oxidoreductase activity, acting on the CH-OH group of donors, NAD or NADP as accep…	GO:0008152//metabolic process;GO:0044710//single-organism metabolic process;GO:0044699//single-organism process
Gene013843	CIL1135S0008	Isoform030871	CIL1135S0008	new	DIM	delta(24)-sterol reductase; K09828 delta24-sterol reductase [EC:1.3.1.72]	Metabolism	Global and Overview;Lipid metabolism	ko01100//Metabolic pathways;ko01110//Biosynthesis of secondary metabolites;ko00100//Steroid biosynthesis	K09828	-	GO:0016616//oxidoreductase activity, acting on the CH-OH group of donors, NAD or NADP as acceptor;GO:1901363//heterocyclic compound binding;GO:1901265//nucleoside phosphate binding;GO:0016491//oxidoreductase activity;GO:0036094//small molecule binding;GO:0000166//nucleotide binding;GO:0005488//binding;GO:0097159//organic cyclic compound binding;GO:0003824//catalytic activity;GO:0016614//oxidoredu…	GO:0044699//single-organism process;GO:0008152//metabolic process;GO:0044710//single-organism metabolic process
Gene013843	CIL1135S0008	Isoform030872	CIL1135S0008	new	DIM	delta(24)-sterol reductase; K09828 delta24-sterol reductase [EC:1.3.1.72]	Metabolism	Global and Overview;Lipid metabolism	ko01100//Metabolic pathways;ko01110//Biosynthesis of secondary metabolites;ko00100//Steroid biosynthesis	K09828	-	GO:0016616//oxidoreductase activity, acting on the CH-OH group of donors, NAD or NADP as acceptor;GO:1901265//nucleoside phosphate binding;GO:0003824//catalytic activity;GO:0016491//oxidoreductase activity;GO:0036094//small molecule binding;GO:0097159//organic cyclic compound binding;GO:0000166//nucleotide binding;GO:0005488//binding;GO:1901363//heterocyclic compound binding;GO:0016614//oxidoredu…	GO:0044699//single-organism process;GO:0044710//single-organism metabolic process;GO:0008152//metabolic process
Gene009798	CIL0984S0057	Isoform021798	CIL0984S0057	new	DPL1	sphingosine-1-phosphate lyase; K01634 sphinganine-1-phosphate aldolase [EC:4.1.2.27]	Metabolism	Lipid metabolism;Global and Overview	ko01100//Metabolic pathways;ko00600//Sphingolipid metabolism	K01634	-	GO:0016832//aldehyde-lyase activity;GO:0016830//carbon-carbon lyase activity;GO:0003824//catalytic activity;GO:0043167//ion binding;GO:0016829//lyase activity;GO:0043168//anion binding;GO:0005488//binding	GO:0044281//small molecule metabolic process;GO:0006082//organic acid metabolic process;GO:0043436//oxoacid metabolic process;GO:0044763//single-organism cellular process;GO:0008152//metabolic process;GO:0044710//single-organism metabolic process;GO:0044237//cellular metabolic process;GO:0044699//single-organism process;GO:0071704//organic substance metabolic process;GO:0009987//cellular process
Gene009798	CIL0984S0057	Isoform021799	CIL0984S0057	new	DPL1	sphingosine-1-phosphate lyase; K01634 sphinganine-1-phosphate aldolase [EC:4.1.2.27]	Metabolism	Lipid metabolism;Global and Overview	ko01100//Metabolic pathways;ko00600//Sphingolipid metabolism	K01634	-	GO:0003824//catalytic activity;GO:0005488//binding;GO:0016830//carbon-carbon lyase activity;GO:0043168//anion binding;GO:0016829//lyase activity;GO:0016832//aldehyde-lyase activity;GO:0043167//ion binding	GO:0009987//cellular process;GO:0044763//single-organism cellular process;GO:0044699//single-organism process;GO:0008152//metabolic process;GO:0043436//oxoacid metabolic process;GO:0044237//cellular metabolic process;GO:0071704//organic substance metabolic process;GO:0044710//single-organism metabolic process;GO:0044281//small molecule metabolic process;GO:0006082//organic acid metabolic process
Gene009798	CIL0984S0057	Isoform021800	CIL0984S0057	new	DPL1	sphingosine-1-phosphate lyase; K01634 sphinganine-1-phosphate aldolase [EC:4.1.2.27]	Metabolism	Global and Overview;Lipid metabolism	ko01100//Metabolic pathways;ko00600//Sphingolipid metabolism	K01634	-	-	-
Gene009798	CIL0984S0057	Isoform021801	CIL0984S0057	new	DPL1	sphingosine-1-phosphate lyase; K01634 sphinganine-1-phosphate aldolase [EC:4.1.2.27]	Metabolism	Lipid metabolism;Global and Overview	ko01100//Metabolic pathways;ko00600//Sphingolipid metabolism	K01634	-	GO:0016830//carbon-carbon lyase activity;GO:0003824//catalytic activity;GO:0016832//aldehyde-lyase activity;GO:0043167//ion binding;GO:0016829//lyase activity;GO:0043168//anion binding;GO:0005488//binding	GO:0071704//organic substance metabolic process;GO:0044710//single-organism metabolic process;GO:0044281//small molecule metabolic process;GO:0043436//oxoacid metabolic process;GO:0044763//single-organism cellular process;GO:0044699//single-organism process;GO:0006082//organic acid metabolic process;GO:0044237//cellular metabolic process;GO:0009987//cellular process;GO:0008152//metabolic process
Gene016084	CIL1225S0004	Isoform036078	CIL1225S0004	new	DWF5	7-dehydrocholesterol reductase; K00213 7-dehydrocholesterol reductase [EC:1.3.1.21]	Metabolism	Global and Overview;Lipid metabolism	ko01100//Metabolic pathways;ko01110//Biosynthesis of secondary metabolites;ko00100//Steroid biosynthesis	K00213	-	GO:0003824//catalytic activity;GO:0016491//oxidoreductase activity;GO:0016627//oxidoreductase activity, acting on the CH-CH group of donors	GO:0008152//metabolic process;GO:0044710//single-organism metabolic process;GO:0044699//single-organism process
Gene016084	CIL1225S0004	Isoform036079	CIL1225S0004	new	DWF5	7-dehydrocholesterol reductase; K00213 7-dehydrocholesterol reductase [EC:1.3.1.21]	Metabolism	Global and Overview;Lipid metabolism	ko01100//Metabolic pathways;ko01110//Biosynthesis of secondary metabolites;ko00100//Steroid biosynthesis	K00213	GO:0031090//organelle membrane;GO:0044464//cell part;GO:0016020//membrane;GO:0005622//intracellular;GO:0044424//intracellular part;GO:0043226//organelle;GO:0044422//organelle part;GO:0005623//cell;GO:0031224//intrinsic component of membrane;GO:0044425//membrane part;GO:0043229//intracellular organelle;GO:0043231//intracellular membrane-bounded organelle;GO:0043227//membrane-bounded organelle	GO:0016627//oxidoreductase activity, acting on the CH-CH group of donors;GO:0016628//oxidoreductase activity, acting on the CH-CH group of donors, NAD or NADP as acceptor;GO:0003824//catalytic activity;GO:0016491//oxidoreductase activity	GO:0016129//phytosteroid biosynthetic process;GO:0044238//primary metabolic process;GO:0044237//cellular metabolic process;GO:1902652//secondary alcohol metabolic process;GO:0044699//single-organism process;GO:0008152//metabolic process;GO:0006066//alcohol metabolic process;GO:0006732//coenzyme metabolic process;GO:0016125//sterol metabolic process;GO:0006694//steroid biosynthetic process;GO:1901…
Gene003584	CIL1493S0030	Isoform007806	CIL1493S0030	known	ECI2	PREDICTED: enoyl-CoA delta isomerase 2, peroxisomal-like [Juglans regia]	Metabolism	Lipid metabolism	ko00071//Fatty acid degradation	K07517	-	-	-
Gene014308	CIL1148S0040	Isoform031923	CIL1148S0040	new	EMB1187	Kinase superfamily protein isoform 1; K00894 ethanolamine kinase [EC:2.7.1.82]	Metabolism	Lipid metabolism;Global and Overview	ko01100//Metabolic pathways;ko00564//Glycerophospholipid metabolism	K00894	-	GO:0036094//small molecule binding;GO:0032549//ribonucleoside binding;GO:0001882//nucleoside binding;GO:0032550//purine ribonucleoside binding;GO:0003824//catalytic activity;GO:0001883//purine nucleoside binding;GO:0016740//transferase activity;GO:0097367//carbohydrate derivative binding;GO:0005488//binding;GO:1901363//heterocyclic compound binding;GO:0016301//kinase activity;GO:0016772//transfer…	GO:0046337//phosphatidylethanolamine metabolic process;GO:0044237//cellular metabolic process;GO:0044699//single-organism process;GO:0019637//organophosphate metabolic process;GO:0009987//cellular process;GO:0071704//organic substance metabolic process;GO:0044710//single-organism metabolic process;GO:0006644//phospholipid metabolic process;GO:0044238//primary metabolic process;GO:0046486//glycero…
Gene006070	CIL0424S0003	Isoform013389	CIL0424S0003	known	fabZ	PREDICTED: 3-hydroxyacyl-[acyl-carrier-protein] dehydratase FabZ-like [Ziziphus jujuba]	Metabolism	Lipid metabolism;Metabolism of cofactors and vitamins;Global and Overview	ko01100//Metabolic pathways;ko01212//Fatty acid metabolism;ko00061//Fatty acid biosynthesis;ko00780//Biotin metabolism	K02372	-	GO:0016835//carbon-oxygen lyase activity;GO:0016829//lyase activity;GO:0003824//catalytic activity	GO:0009987//cellular process;GO:0032787//monocarboxylic acid metabolic process;GO:0044699//single-organism process;GO:0044281//small molecule metabolic process;GO:0008152//metabolic process;GO:0044255//cellular lipid metabolic process;GO:0006629//lipid metabolic process;GO:0043436//oxoacid metabolic process;GO:0006082//organic acid metabolic process;GO:0006631//fatty acid metabolic process;GO:007…
Gene003867	CIL1507S0011	Isoform008462	CIL1507S0011	known	FAD12	PREDICTED: delta(12)-acyl-lipid-desaturase-like [Juglans regia]	Metabolism	Lipid metabolism;Global and Overview	ko01212//Fatty acid metabolism;ko01040//Biosynthesis of unsaturated fatty acids	K10256	-	GO:0003824//catalytic activity;GO:0016705//oxidoreductase activity, acting on paired donors, with incorporation or reduction of molecular oxygen;GO:0016491//oxidoreductase activity	GO:0044710//single-organism metabolic process;GO:0044238//primary metabolic process;GO:0008152//metabolic process;GO:0044699//single-organism process
Gene003867	CIL1507S0011	Isoform008465	CIL1507S0011	new	FAD2-1	omega-6 fatty acid desaturase, endoplasmic reticulum isozyme 2-like; K10256 omega-6 fatty acid desaturase (delta-12 desaturase) [EC:1.14.19.-]	Metabolism	Global and Overview;Lipid metabolism	ko01212//Fatty acid metabolism;ko01040//Biosynthesis of unsaturated fatty acids	K10256	-	GO:0016491//oxidoreductase activity;GO:0016705//oxidoreductase activity, acting on paired donors, with incorporation or reduction of molecular oxygen;GO:0003824//catalytic activity	GO:0044699//single-organism process;GO:0008152//metabolic process;GO:0044238//primary metabolic process;GO:0044710//single-organism metabolic process
Gene003867	CIL1507S0011	Isoform008463	CIL1507S0011	new	FAD2-2	omega-6 fatty acid desaturase, endoplasmic reticulum isozyme 2-like; K10256 omega-6 fatty acid desaturase (delta-12 desaturase) [EC:1.14.19.-]	Metabolism	Lipid metabolism;Global and Overview	ko01212//Fatty acid metabolism;ko01040//Biosynthesis of unsaturated fatty acids	K10256	-	GO:0016705//oxidoreductase activity, acting on paired donors, with incorporation or reduction of molecular oxygen;GO:0003824//catalytic activity;GO:0016491//oxidoreductase activity	GO:0044238//primary metabolic process;GO:0008152//metabolic process;GO:0044699//single-organism process;GO:0044710//single-organism metabolic process
Gene003867	CIL1507S0011	Isoform008464	CIL1507S0011	new	FAD2-2	omega-6 fatty acid desaturase, endoplasmic reticulum isozyme 2-like; K10256 omega-6 fatty acid desaturase (delta-12 desaturase) [EC:1.14.19.-]	Metabolism	Lipid metabolism;Global and Overview	ko01212//Fatty acid metabolism;ko01040//Biosynthesis of unsaturated fatty acids	K10256	-	GO:0016705//oxidoreductase activity, acting on paired donors, with incorporation or reduction of molecular oxygen;GO:0016491//oxidoreductase activity;GO:0003824//catalytic activity	GO:0044699//single-organism process;GO:0044710//single-organism metabolic process;GO:0008152//metabolic process;GO:0044238//primary metabolic process
Gene003867	CIL1507S0011	Isoform008466	CIL1507S0011	new	FAD2-2	omega-6 fatty acid desaturase, endoplasmic reticulum isozyme 2-like; K10256 omega-6 fatty acid desaturase (delta-12 desaturase) [EC:1.14.19.-]	Metabolism	Lipid metabolism;Global and Overview	ko01212//Fatty acid metabolism;ko01040//Biosynthesis of unsaturated fatty acids	K10256	-	GO:0016491//oxidoreductase activity;GO:0003824//catalytic activity;GO:0016705//oxidoreductase activity, acting on paired donors, with incorporation or reduction of molecular oxygen	GO:0044238//primary metabolic process;GO:0008152//metabolic process;GO:0044710//single-organism metabolic process;GO:0044699//single-organism process
Gene003867	CIL1507S0011	Isoform008467	CIL1507S0011	new	FAD2-2	omega-6 fatty acid desaturase, endoplasmic reticulum isozyme 2-like; K10256 omega-6 fatty acid desaturase (delta-12 desaturase) [EC:1.14.19.-]	Metabolism	Global and Overview;Lipid metabolism	ko01212//Fatty acid metabolism;ko01040//Biosynthesis of unsaturated fatty acids	K10256	-	GO:0016491//oxidoreductase activity;GO:0016705//oxidoreductase activity, acting on paired donors, with incorporation or reduction of molecular oxygen;GO:0003824//catalytic activity	GO:0044699//single-organism process;GO:0044710//single-organism metabolic process;GO:0008152//metabolic process;GO:0044238//primary metabolic process
Gene003867	CIL1507S0011	Isoform008468	CIL1507S0011	new	FAD2-2	omega-6 fatty acid desaturase, endoplasmic reticulum isozyme 2-like; K10256 omega-6 fatty acid desaturase (delta-12 desaturase) [EC:1.14.19.-]	Metabolism	Global and Overview;Lipid metabolism	ko01212//Fatty acid metabolism;ko01040//Biosynthesis of unsaturated fatty acids	K10256	-	GO:0016705//oxidoreductase activity, acting on paired donors, with incorporation or reduction of molecular oxygen;GO:0003824//catalytic activity;GO:0016491//oxidoreductase activity	GO:0044699//single-organism process;GO:0044710//single-organism metabolic process;GO:0044238//primary metabolic process;GO:0008152//metabolic process
Gene003867	CIL1507S0011	Isoform008469	CIL1507S0011	new	FAD2-2	omega-6 fatty acid desaturase, endoplasmic reticulum isozyme 2-like; K10256 omega-6 fatty acid desaturase (delta-12 desaturase) [EC:1.14.19.-]	Metabolism	Lipid metabolism;Global and Overview	ko01212//Fatty acid metabolism;ko01040//Biosynthesis of unsaturated fatty acids	K10256	-	GO:0016705//oxidoreductase activity, acting on paired donors, with incorporation or reduction of molecular oxygen;GO:0003824//catalytic activity;GO:0016491//oxidoreductase activity	GO:0044699//single-organism process;GO:0044238//primary metabolic process;GO:0044710//single-organism metabolic process;GO:0008152//metabolic process
Gene009925	CIL0987S0038	Isoform022066	CIL0987S0038	new	FAD2-2	omega-6 fatty acid desaturase, endoplasmic reticulum isozyme 2-like; K10256 omega-6 fatty acid desaturase (delta-12 desaturase) [EC:1.14.19.-]	Metabolism	Global and Overview;Lipid metabolism	ko01212//Fatty acid metabolism;ko01040//Biosynthesis of unsaturated fatty acids	K10256	GO:0043227//membrane-bounded organelle;GO:0031090//organelle membrane;GO:0044425//membrane part;GO:0044422//organelle part;GO:0016020//membrane;GO:0043226//organelle;GO:0031224//intrinsic component of membrane	GO:0016705//oxidoreductase activity, acting on paired donors, with incorporation or reduction of molecular oxygen;GO:0003824//catalytic activity;GO:0016491//oxidoreductase activity	GO:0009987//cellular process;GO:0046394//carboxylic acid biosynthetic process;GO:0044763//single-organism cellular process;GO:0016053//organic acid biosynthetic process;GO:0044249//cellular biosynthetic process;GO:0044710//single-organism metabolic process;GO:0008152//metabolic process;GO:0006629//lipid metabolic process;GO:0044238//primary metabolic process;GO:0044283//small molecule biosyntheti…
Gene004820	CIL1604S0003	Isoform010630	CIL1604S0003	new	FAD3	omega-3 fatty acid desaturase, endoplasmic reticulum-like; K10257 omega-3 fatty acid desaturase (delta-15 desaturase) [EC:1.14.19.-]	Metabolism	Global and Overview;Lipid metabolism	ko01212//Fatty acid metabolism;ko01040//Biosynthesis of unsaturated fatty acids	K10257	-	-	-
Gene004820	CIL1604S0003	Isoform010631	CIL1604S0003	new	FAD3	omega-3 fatty acid desaturase, endoplasmic reticulum-like; K10257 omega-3 fatty acid desaturase (delta-15 desaturase) [EC:1.14.19.-]	Metabolism	Global and Overview;Lipid metabolism	ko01212//Fatty acid metabolism;ko01040//Biosynthesis of unsaturated fatty acids	K10257	-	-	-
Gene010765	CIL1021S0079	Isoform023989	CIL1021S0079	new	FAD7	POPTRDRAFT_724446; chloroplast omega-3 desaturase family protein; K10257 omega-3 fatty acid desaturase (delta-15 desaturase) [EC:1.14.19.-]	Metabolism	Lipid metabolism;Global and Overview	ko01212//Fatty acid metabolism;ko01040//Biosynthesis of unsaturated fatty acids	K10257	-	GO:0003824//catalytic activity;GO:0016705//oxidoreductase activity, acting on paired donors, with incorporation or reduction of molecular oxygen;GO:0016491//oxidoreductase activity	GO:0044699//single-organism process;GO:0008152//metabolic process;GO:0044710//single-organism metabolic process
Gene010765	CIL1021S0079	Isoform023990	CIL1021S0079	new	FAD7	POPTRDRAFT_724446; chloroplast omega-3 desaturase family protein; K10257 omega-3 fatty acid desaturase (delta-15 desaturase) [EC:1.14.19.-]	Metabolism	Lipid metabolism;Global and Overview	ko01212//Fatty acid metabolism;ko01040//Biosynthesis of unsaturated fatty acids	K10257	-	GO:0003824//catalytic activity;GO:0016705//oxidoreductase activity, acting on paired donors, with incorporation or reduction of molecular oxygen;GO:0016491//oxidoreductase activity	GO:0044699//single-organism process;GO:0008152//metabolic process;GO:0044710//single-organism metabolic process
Gene000189	CIL1264S0069	Isoform000392	CIL1264S0069	known	FAD7	PREDICTED: omega-3 fatty acid desaturase, chloroplastic-like [Juglans regia]	-	-	-	-	-	GO:0016491//oxidoreductase activity;GO:0016705//oxidoreductase activity, acting on paired donors, with incorporation or reduction of molecular oxygen;GO:0003824//catalytic activity	GO:0044710//single-organism metabolic process;GO:0044699//single-organism process;GO:0008152//metabolic process
Gene002945	CIL1445S0018	Isoform006428	CIL1445S0018	known	FATA	PREDICTED: oleoyl-acyl carrier protein thioesterase 1, chloroplastic-like [Juglans regia]	Metabolism	Lipid metabolism	ko00061//Fatty acid biosynthesis	K10782	-	GO:0016788//hydrolase activity, acting on ester bonds;GO:0003824//catalytic activity;GO:0016787//hydrolase activity	-
Gene002945	CIL1445S0018	Isoform006429	CIL1445S0018	new	FATA	oleoyl-acyl carrier protein thioesterase 1, chloroplastic-like; K10782 fatty acyl-ACP thioesterase A [EC:3.1.2.14]	Metabolism	Lipid metabolism	ko00061//Fatty acid biosynthesis	K10782	-	GO:0003824//catalytic activity;GO:0016787//hydrolase activity;GO:0016788//hydrolase activity, acting on ester bonds	-
Gene002945	CIL1445S0018	Isoform006430	CIL1445S0018	new	FATA	oleoyl-acyl carrier protein thioesterase 1, chloroplastic-like; K10782 fatty acyl-ACP thioesterase A [EC:3.1.2.14]	Metabolism	Lipid metabolism	ko00061//Fatty acid biosynthesis	K10782	-	GO:0003824//catalytic activity;GO:0016787//hydrolase activity;GO:0016788//hydrolase activity, acting on ester bonds	-
Gene002945	CIL1445S0018	Isoform006431	CIL1445S0018	new	FATA	oleoyl-acyl carrier protein thioesterase 1, chloroplastic-like; K10782 fatty acyl-ACP thioesterase A [EC:3.1.2.14]	Metabolism	Lipid metabolism	ko00061//Fatty acid biosynthesis	K10782	-	-	-
Gene010131	CIL0992S0068	Isoform022485	CIL0992S0068	new	FATA	oleoyl-acyl carrier protein thioesterase, chloroplastic; K10782 fatty acyl-ACP thioesterase A [EC:3.1.2.14]	Metabolism	Lipid metabolism	ko00061//Fatty acid biosynthesis	K10782	GO:0044444//cytoplasmic part;GO:0044464//cell part;GO:0005623//cell;GO:0009536//plastid;GO:0043227//membrane-bounded organelle;GO:0043226//organelle;GO:0043231//intracellular membrane-bounded organelle;GO:0043229//intracellular organelle;GO:0044424//intracellular part;GO:0005622//intracellular;GO:0005737//cytoplasm	GO:0016788//hydrolase activity, acting on ester bonds;GO:0016747//transferase activity, transferring acyl groups other than amino-acyl groups;GO:0016740//transferase activity;GO:0016787//hydrolase activity;GO:0003824//catalytic activity;GO:0016746//transferase activity, transferring acyl groups;GO:0016790//thiolester hydrolase activity;GO:0016297//acyl-[acyl-carrier-protein] hydrolase activity;GO…	GO:0044699//single-organism process;GO:0044281//small molecule metabolic process;GO:0044238//primary metabolic process;GO:0071704//organic substance metabolic process;GO:0009987//cellular process;GO:0044237//cellular metabolic process;GO:0006629//lipid metabolic process;GO:0043436//oxoacid metabolic process;GO:0006631//fatty acid metabolic process;GO:0044710//single-organism metabolic process;GO:…
Gene006859	CIL0895S0249	Isoform015011	CIL0895S0249	new	FATB1	palmitoyl-acyl carrier protein thioesterase, chloroplastic-like; K10781 fatty acyl-ACP thioesterase B [EC:3.1.2.14 3.1.2.21]	Metabolism	Global and Overview;Lipid metabolism	ko01100//Metabolic pathways;ko01212//Fatty acid metabolism;ko00061//Fatty acid biosynthesis	K10781	GO:0043229//intracellular organelle;GO:0005622//intracellular;GO:0043227//membrane-bounded organelle;GO:0009536//plastid;GO:0044464//cell part;GO:0044444//cytoplasmic part;GO:0043231//intracellular membrane-bounded organelle;GO:0044424//intracellular part;GO:0043226//organelle;GO:0005623//cell;GO:0005737//cytoplasm	GO:0016788//hydrolase activity, acting on ester bonds;GO:0016740//transferase activity;GO:0016746//transferase activity, transferring acyl groups;GO:0016747//transferase activity, transferring acyl groups other than amino-acyl groups;GO:0003824//catalytic activity;GO:0004312//fatty acid synthase activity;GO:0016787//hydrolase activity	GO:0071704//organic substance metabolic process;GO:0044238//primary metabolic process;GO:0044281//small molecule metabolic process;GO:0044237//cellular metabolic process;GO:0044710//single-organism metabolic process;GO:0032787//monocarboxylic acid metabolic process;GO:0006629//lipid metabolic process;GO:0044255//cellular lipid metabolic process;GO:0044699//single-organism process;GO:0044763//sing…
Gene006859	CIL0895S0249	Isoform015012	CIL0895S0249	new	FATB1	palmitoyl-acyl carrier protein thioesterase, chloroplastic-like; K10781 fatty acyl-ACP thioesterase B [EC:3.1.2.14 3.1.2.21]	Metabolism	Global and Overview;Lipid metabolism	ko01100//Metabolic pathways;ko01212//Fatty acid metabolism;ko00061//Fatty acid biosynthesis	K10781	GO:0043227//membrane-bounded organelle;GO:0043229//intracellular organelle;GO:0044444//cytoplasmic part;GO:0005623//cell;GO:0005622//intracellular;GO:0043226//organelle;GO:0043231//intracellular membrane-bounded organelle;GO:0044464//cell part;GO:0009536//plastid;GO:0005737//cytoplasm;GO:0044424//intracellular part	GO:0016740//transferase activity;GO:0003824//catalytic activity;GO:0016787//hydrolase activity;GO:0016747//transferase activity, transferring acyl groups other than amino-acyl groups;GO:0016788//hydrolase activity, acting on ester bonds;GO:0004312//fatty acid synthase activity;GO:0016746//transferase activity, transferring acyl groups	GO:0008152//metabolic process;GO:0019752//carboxylic acid metabolic process;GO:0044255//cellular lipid metabolic process;GO:0044281//small molecule metabolic process;GO:0044710//single-organism metabolic process;GO:0006629//lipid metabolic process;GO:0044763//single-organism cellular process;GO:0044238//primary metabolic process;GO:0044699//single-organism process;GO:0071704//organic substance me…
Gene015001	CIL1173S0086	Isoform033660	CIL1173S0086	new	FATB1	palmitoyl-acyl carrier protein thioesterase, chloroplastic; K10781 fatty acyl-ACP thioesterase B [EC:3.1.2.14 3.1.2.21]	Metabolism	Global and Overview;Lipid metabolism	ko01100//Metabolic pathways;ko01212//Fatty acid metabolism;ko00061//Fatty acid biosynthesis	K10781	GO:0043229//intracellular organelle;GO:0005623//cell;GO:0005622//intracellular;GO:0009536//plastid;GO:0043231//intracellular membrane-bounded organelle;GO:0043227//membrane-bounded organelle;GO:0043226//organelle;GO:0044424//intracellular part;GO:0044444//cytoplasmic part;GO:0005737//cytoplasm;GO:0044464//cell part	GO:0016787//hydrolase activity;GO:0016788//hydrolase activity, acting on ester bonds;GO:0003824//catalytic activity;GO:0016740//transferase activity;GO:0016747//transferase activity, transferring acyl groups other than amino-acyl groups;GO:0016746//transferase activity, transferring acyl groups;GO:0004312//fatty acid synthase activity	GO:0032787//monocarboxylic acid metabolic process;GO:0008152//metabolic process;GO:0071704//organic substance metabolic process;GO:0044699//single-organism process;GO:0043436//oxoacid metabolic process;GO:0044281//small molecule metabolic process;GO:0044763//single-organism cellular process;GO:0044237//cellular metabolic process;GO:0006629//lipid metabolic process;GO:0019752//carboxylic acid meta…
Gene015001	CIL1173S0086	Isoform033661	CIL1173S0086	new	FATB1	palmitoyl-acyl carrier protein thioesterase, chloroplastic; K10781 fatty acyl-ACP thioesterase B [EC:3.1.2.14 3.1.2.21]	Metabolism	Global and Overview;Lipid metabolism	ko01100//Metabolic pathways;ko01212//Fatty acid metabolism;ko00061//Fatty acid biosynthesis	K10781	GO:0005622//intracellular;GO:0044444//cytoplasmic part;GO:0044464//cell part;GO:0005737//cytoplasm;GO:0005623//cell;GO:0043227//membrane-bounded organelle;GO:0043231//intracellular membrane-bounded organelle;GO:0043226//organelle;GO:0044424//intracellular part;GO:0043229//intracellular organelle;GO:0009536//plastid	GO:0016746//transferase activity, transferring acyl groups;GO:0003824//catalytic activity;GO:0016747//transferase activity, transferring acyl groups other than amino-acyl groups;GO:0016787//hydrolase activity;GO:0004312//fatty acid synthase activity;GO:0016788//hydrolase activity, acting on ester bonds;GO:0016740//transferase activity	GO:0044763//single-organism cellular process;GO:0019752//carboxylic acid metabolic process;GO:0008152//metabolic process;GO:0044281//small molecule metabolic process;GO:0044237//cellular metabolic process;GO:0044699//single-organism process;GO:0044255//cellular lipid metabolic process;GO:0043436//oxoacid metabolic process;GO:0006082//organic acid metabolic process;GO:0071704//organic substance me…
Gene015001	CIL1173S0086	Isoform033662	CIL1173S0086	new	FATB1	palmitoyl-acyl carrier protein thioesterase, chloroplastic; K10781 fatty acyl-ACP thioesterase B [EC:3.1.2.14 3.1.2.21]	Metabolism	Global and Overview;Lipid metabolism	ko01100//Metabolic pathways;ko01212//Fatty acid metabolism;ko00061//Fatty acid biosynthesis	K10781	GO:0044464//cell part;GO:0005737//cytoplasm;GO:0009536//plastid;GO:0044424//intracellular part;GO:0005622//intracellular;GO:0043231//intracellular membrane-bounded organelle;GO:0043226//organelle;GO:0043229//intracellular organelle;GO:0005623//cell;GO:0044444//cytoplasmic part;GO:0043227//membrane-bounded organelle	GO:0003824//catalytic activity;GO:0016788//hydrolase activity, acting on ester bonds;GO:0004312//fatty acid synthase activity;GO:0016747//transferase activity, transferring acyl groups other than amino-acyl groups;GO:0016746//transferase activity, transferring acyl groups;GO:0016740//transferase activity;GO:0016787//hydrolase activity	GO:0043436//oxoacid metabolic process;GO:0044699//single-organism process;GO:0008152//metabolic process;GO:0019752//carboxylic acid metabolic process;GO:0044255//cellular lipid metabolic process;GO:0044710//single-organism metabolic process;GO:0044238//primary metabolic process;GO:0032787//monocarboxylic acid metabolic process;GO:0071704//organic substance metabolic process;GO:0044763//single-org…
Gene015001	CIL1173S0086	Isoform033664	CIL1173S0086	new	FATB1	palmitoyl-acyl carrier protein thioesterase, chloroplastic; K10781 fatty acyl-ACP thioesterase B [EC:3.1.2.14 3.1.2.21]	Metabolism	Lipid metabolism;Global and Overview	ko01100//Metabolic pathways;ko01212//Fatty acid metabolism;ko00061//Fatty acid biosynthesis	K10781	GO:0043231//intracellular membrane-bounded organelle;GO:0044424//intracellular part;GO:0044464//cell part;GO:0005737//cytoplasm;GO:0005622//intracellular;GO:0043227//membrane-bounded organelle;GO:0005623//cell;GO:0043226//organelle;GO:0043229//intracellular organelle;GO:0044444//cytoplasmic part;GO:0009536//plastid	GO:0016787//hydrolase activity;GO:0016788//hydrolase activity, acting on ester bonds;GO:0004312//fatty acid synthase activity;GO:0016747//transferase activity, transferring acyl groups other than amino-acyl groups;GO:0016746//transferase activity, transferring acyl groups;GO:0016740//transferase activity;GO:0003824//catalytic activity	GO:0006082//organic acid metabolic process;GO:0044238//primary metabolic process;GO:0019752//carboxylic acid metabolic process;GO:0006631//fatty acid metabolic process;GO:0044710//single-organism metabolic process;GO:0071704//organic substance metabolic process;GO:0044255//cellular lipid metabolic process;GO:0008152//metabolic process;GO:0043436//oxoacid metabolic process;GO:0044699//single-organ…
Gene015001	CIL1173S0086	Isoform033665	CIL1173S0086	new	FATB1	palmitoyl-acyl carrier protein thioesterase, chloroplastic; K10781 fatty acyl-ACP thioesterase B [EC:3.1.2.14 3.1.2.21]	Metabolism	Global and Overview;Lipid metabolism	ko01100//Metabolic pathways;ko01212//Fatty acid metabolism;ko00061//Fatty acid biosynthesis	K10781	GO:0043227//membrane-bounded organelle;GO:0005623//cell;GO:0043229//intracellular organelle;GO:0005737//cytoplasm;GO:0009536//plastid;GO:0005622//intracellular;GO:0044424//intracellular part;GO:0043226//organelle;GO:0044464//cell part;GO:0044444//cytoplasmic part;GO:0043231//intracellular membrane-bounded organelle	GO:0016747//transferase activity, transferring acyl groups other than amino-acyl groups;GO:0016740//transferase activity;GO:0003824//catalytic activity;GO:0016788//hydrolase activity, acting on ester bonds;GO:0004312//fatty acid synthase activity;GO:0016746//transferase activity, transferring acyl groups;GO:0016787//hydrolase activity	GO:0044238//primary metabolic process;GO:0009987//cellular process;GO:0019752//carboxylic acid metabolic process;GO:0006629//lipid metabolic process;GO:0071704//organic substance metabolic process;GO:0006631//fatty acid metabolic process;GO:0044281//small molecule metabolic process;GO:0044255//cellular lipid metabolic process;GO:0032787//monocarboxylic acid metabolic process;GO:0006082//organic a…
Gene003949	CIL1516S0016	Isoform008614	CIL1516S0016	known	FDH	PREDICTED: 3-ketoacyl-CoA synthase 10 [Juglans regia]	Metabolism;Organismal Systems	Global and Overview;Lipid metabolism;Environmental adaptation	ko01100//Metabolic pathways;ko01110//Biosynthesis of secondary metabolites;ko04626//Plant-pathogen interaction;ko00062//Fatty acid elongation	K15397	GO:0005622//intracellular;GO:0044425//membrane part;GO:0016020//membrane;GO:0044424//intracellular part;GO:0005623//cell;GO:0043231//intracellular membrane-bounded organelle;GO:0043229//intracellular organelle;GO:0031224//intrinsic component of membrane;GO:0043226//organelle;GO:0043227//membrane-bounded organelle;GO:0044464//cell part	GO:0016740//transferase activity;GO:0016746//transferase activity, transferring acyl groups;GO:0003824//catalytic activity	GO:0032501//multicellular organismal process;GO:0006629//lipid metabolic process;GO:0044710//single-organism metabolic process;GO:0071704//organic substance metabolic process;GO:0044699//single-organism process;GO:0044767//single-organism developmental process;GO:0009987//cellular process;GO:0044707//single-multicellular organism process;GO:0043436//oxoacid metabolic process;GO:0044281//small mol…
Gene003949	CIL1516S0016	Isoform008615	CIL1516S0016	new	FDH	3-ketoacyl-CoA synthase 10-like; K15397 3-ketoacyl-CoA synthase [EC:2.3.1.199]	Metabolism	Lipid metabolism;Global and Overview	ko01110//Biosynthesis of secondary metabolites;ko00062//Fatty acid elongation	K15397	-	GO:0016740//transferase activity;GO:0016746//transferase activity, transferring acyl groups;GO:0003824//catalytic activity	GO:0044281//small molecule metabolic process;GO:0019752//carboxylic acid metabolic process;GO:0006631//fatty acid metabolic process;GO:0009987//cellular process;GO:0071704//organic substance metabolic process;GO:0006629//lipid metabolic process;GO:0044255//cellular lipid metabolic process;GO:0044763//single-organism cellular process;GO:0008152//metabolic process;GO:0044237//cellular metabolic pro…
Gene003949	CIL1516S0016	Isoform008616	CIL1516S0016	new	FDH	3-ketoacyl-CoA synthase 10; K15397 3-ketoacyl-CoA synthase [EC:2.3.1.199]	Metabolism	Lipid metabolism;Global and Overview	ko01110//Biosynthesis of secondary metabolites;ko00062//Fatty acid elongation	K15397	GO:0044425//membrane part;GO:0044464//cell part;GO:0043226//organelle;GO:0043229//intracellular organelle;GO:0005623//cell;GO:0031224//intrinsic component of membrane;GO:0016020//membrane;GO:0044424//intracellular part;GO:0043231//intracellular membrane-bounded organelle;GO:0005622//intracellular;GO:0043227//membrane-bounded organelle	GO:0016740//transferase activity;GO:0003824//catalytic activity;GO:0016746//transferase activity, transferring acyl groups	GO:0007275//multicellular organism development;GO:0009987//cellular process;GO:0043436//oxoacid metabolic process;GO:0044763//single-organism cellular process;GO:0032501//multicellular organismal process;GO:0071704//organic substance metabolic process;GO:0019752//carboxylic acid metabolic process;GO:0008152//metabolic process;GO:0044707//single-multicellular organism process;GO:0044237//cellular …
Gene002321	CIL1399S0009	Isoform005107	CIL1399S0009	known	Gba2	PREDICTED: non-lysosomal glucosylceramidase-like isoform X1 [Juglans regia]	Metabolism	Global and Overview;Lipid metabolism;Glycan biosynthesis and metabolism	ko01100//Metabolic pathways;ko00600//Sphingolipid metabolism;ko00511//Other glycan degradation	K17108	-	-	-
Gene002321	CIL1399S0009	Isoform005108	CIL1399S0009	new	Gba2	non-lysosomal glucosylceramidase; K17108 non-lysosomal glucosylceramidase [EC:3.2.1.45]	Metabolism	Lipid metabolism;Glycan biosynthesis and metabolism;Global and Overview	ko01100//Metabolic pathways;ko00600//Sphingolipid metabolism;ko00511//Other glycan degradation	K17108	-	-	-
Gene002321	CIL1399S0009	Isoform005109	CIL1399S0009	new	Gba2	non-lysosomal glucosylceramidase; K17108 non-lysosomal glucosylceramidase [EC:3.2.1.45]	Metabolism	Glycan biosynthesis and metabolism;Lipid metabolism;Global and Overview	ko01100//Metabolic pathways;ko00600//Sphingolipid metabolism;ko00511//Other glycan degradation	K17108	-	-	-
Gene002321	CIL1399S0009	Isoform005110	CIL1399S0009	new	Gba2	non-lysosomal glucosylceramidase; K17108 non-lysosomal glucosylceramidase [EC:3.2.1.45]	Metabolism	Global and Overview;Lipid metabolism;Glycan biosynthesis and metabolism	ko01100//Metabolic pathways;ko00600//Sphingolipid metabolism;ko00511//Other glycan degradation	K17108	-	-	-
Gene004280	CIL1549S0007	Isoform009342	CIL1549S0007	new	Gba2	Beta-glucosidase, GBA2 type family protein isoform 1; K17108 non-lysosomal glucosylceramidase [EC:3.2.1.45]	Metabolism	Lipid metabolism;Glycan biosynthesis and metabolism;Global and Overview	ko01100//Metabolic pathways;ko00600//Sphingolipid metabolism;ko00511//Other glycan degradation	K17108	GO:0031224//intrinsic component of membrane;GO:0016020//membrane;GO:0044425//membrane part	GO:0003824//catalytic activity;GO:0004553//hydrolase activity, hydrolyzing O-glycosyl compounds;GO:0016798//hydrolase activity, acting on glycosyl bonds;GO:0016787//hydrolase activity	GO:0006664//glycolipid metabolic process;GO:0006807//nitrogen compound metabolic process;GO:0006643//membrane lipid metabolic process;GO:0044710//single-organism metabolic process;GO:1903509//liposaccharide metabolic process;GO:0044763//single-organism cellular process;GO:0044255//cellular lipid metabolic process;GO:1901564//organonitrogen compound metabolic process;GO:0006629//lipid metabolic pr…
Gene004280	CIL1549S0007	Isoform009343	CIL1549S0007	known	Gba2	PREDICTED: non-lysosomal glucosylceramidase-like isoform X1 [Juglans regia]	Metabolism	Lipid metabolism;Glycan biosynthesis and metabolism;Global and Overview	ko01100//Metabolic pathways;ko00600//Sphingolipid metabolism;ko00511//Other glycan degradation	K17108	GO:0031224//intrinsic component of membrane;GO:0044425//membrane part;GO:0016020//membrane	GO:0003824//catalytic activity;GO:0004553//hydrolase activity, hydrolyzing O-glycosyl compounds;GO:0016787//hydrolase activity;GO:0016798//hydrolase activity, acting on glycosyl bonds	GO:0043603//cellular amide metabolic process;GO:0009987//cellular process;GO:0044710//single-organism metabolic process;GO:0006678//glucosylceramide metabolic process;GO:0071704//organic substance metabolic process;GO:0006807//nitrogen compound metabolic process;GO:0006672//ceramide metabolic process;GO:0006687//glycosphingolipid metabolic process;GO:1901135//carbohydrate derivative metabolic pro…
Gene004280	CIL1549S0007	Isoform009344	CIL1549S0007	new	Gba2	non-lysosomal glucosylceramidase; K17108 non-lysosomal glucosylceramidase [EC:3.2.1.45]	Metabolism	Global and Overview;Lipid metabolism;Glycan biosynthesis and metabolism	ko01100//Metabolic pathways;ko00600//Sphingolipid metabolism;ko00511//Other glycan degradation	K17108	GO:0016020//membrane;GO:0031224//intrinsic component of membrane;GO:0044425//membrane part	GO:0003824//catalytic activity;GO:0004553//hydrolase activity, hydrolyzing O-glycosyl compounds;GO:0016787//hydrolase activity;GO:0016798//hydrolase activity, acting on glycosyl bonds	GO:0006629//lipid metabolic process;GO:0044763//single-organism cellular process;GO:0006678//glucosylceramide metabolic process;GO:0009987//cellular process;GO:0044238//primary metabolic process;GO:0006664//glycolipid metabolic process;GO:0006677//glycosylceramide metabolic process;GO:1901564//organonitrogen compound metabolic process;GO:0044255//cellular lipid metabolic process;GO:0006687//glyco…
Gene004280	CIL1549S0007	Isoform009345	CIL1549S0007	new	Gba2	non-lysosomal glucosylceramidase; K17108 non-lysosomal glucosylceramidase [EC:3.2.1.45]	Metabolism	Glycan biosynthesis and metabolism;Lipid metabolism;Global and Overview	ko01100//Metabolic pathways;ko00600//Sphingolipid metabolism;ko00511//Other glycan degradation	K17108	GO:0016020//membrane;GO:0044425//membrane part;GO:0031224//intrinsic component of membrane	GO:0016787//hydrolase activity;GO:0003824//catalytic activity;GO:0004553//hydrolase activity, hydrolyzing O-glycosyl compounds;GO:0016798//hydrolase activity, acting on glycosyl bonds	GO:0006665//sphingolipid metabolic process;GO:0044699//single-organism process;GO:0009987//cellular process;GO:0006629//lipid metabolic process;GO:0071704//organic substance metabolic process;GO:0044710//single-organism metabolic process;GO:1903509//liposaccharide metabolic process;GO:0006687//glycosphingolipid metabolic process;GO:0006664//glycolipid metabolic process;GO:0044763//single-organism…
Gene004280	CIL1549S0007	Isoform009346	CIL1549S0007	new	Gba2	non-lysosomal glucosylceramidase; K17108 non-lysosomal glucosylceramidase [EC:3.2.1.45]	Metabolism	Glycan biosynthesis and metabolism;Lipid metabolism;Global and Overview	ko01100//Metabolic pathways;ko00600//Sphingolipid metabolism;ko00511//Other glycan degradation	K17108	-	-	-
Gene009212	CIL0962S0117,CIL0962S0118	Isoform020419	CIL0962S0117,CIL0962S0118	new	Gba2	non-lysosomal glucosylceramidase-like; K17108 non-lysosomal glucosylceramidase [EC:3.2.1.45]	Metabolism	Global and Overview;Lipid metabolism;Glycan biosynthesis and metabolism	ko01100//Metabolic pathways;ko00600//Sphingolipid metabolism;ko00511//Other glycan degradation	K17108	GO:0031224//intrinsic component of membrane;GO:0044425//membrane part;GO:0016020//membrane	GO:0016798//hydrolase activity, acting on glycosyl bonds;GO:0016787//hydrolase activity;GO:0004553//hydrolase activity, hydrolyzing O-glycosyl compounds;GO:0003824//catalytic activity	GO:1901564//organonitrogen compound metabolic process;GO:0006664//glycolipid metabolic process;GO:0044255//cellular lipid metabolic process;GO:0071704//organic substance metabolic process;GO:0043603//cellular amide metabolic process;GO:0006629//lipid metabolic process;GO:0006672//ceramide metabolic process;GO:0044237//cellular metabolic process;GO:1901135//carbohydrate derivative metabolic proces…
Gene009212	CIL0962S0117,CIL0962S0118	Isoform020420	CIL0962S0117,CIL0962S0118	new	Gba2	non-lysosomal glucosylceramidase-like; K17108 non-lysosomal glucosylceramidase [EC:3.2.1.45]	Metabolism	Global and Overview;Glycan biosynthesis and metabolism;Lipid metabolism	ko01100//Metabolic pathways;ko00600//Sphingolipid metabolism;ko00511//Other glycan degradation	K17108	GO:0044425//membrane part;GO:0031224//intrinsic component of membrane;GO:0016020//membrane	GO:0016798//hydrolase activity, acting on glycosyl bonds;GO:0016787//hydrolase activity;GO:0003824//catalytic activity;GO:0004553//hydrolase activity, hydrolyzing O-glycosyl compounds	GO:1901564//organonitrogen compound metabolic process;GO:0009987//cellular process;GO:0008152//metabolic process;GO:0006678//glucosylceramide metabolic process;GO:0044237//cellular metabolic process;GO:0006687//glycosphingolipid metabolic process;GO:0044255//cellular lipid metabolic process;GO:1901135//carbohydrate derivative metabolic process;GO:0044763//single-organism cellular process;GO:00066…
Gene009390	CIL0972S0059	Isoform020898	CIL0972S0059	new	GBA2	Non-lysosomal glucosylceramidase; K17108 non-lysosomal glucosylceramidase [EC:3.2.1.45]	Metabolism	Global and Overview;Lipid metabolism;Glycan biosynthesis and metabolism	ko01100//Metabolic pathways;ko00600//Sphingolipid metabolism;ko00511//Other glycan degradation	K17108	GO:0043231//intracellular membrane-bounded organelle;GO:0044424//intracellular part;GO:0016020//membrane;GO:0043227//membrane-bounded organelle;GO:0043226//organelle;GO:0044425//membrane part;GO:0031224//intrinsic component of membrane;GO:0043229//intracellular organelle;GO:0044464//cell part;GO:0005623//cell;GO:0005622//intracellular	GO:0004553//hydrolase activity, hydrolyzing O-glycosyl compounds;GO:0016798//hydrolase activity, acting on glycosyl bonds;GO:0003824//catalytic activity;GO:0016787//hydrolase activity	GO:1903509//liposaccharide metabolic process;GO:0006665//sphingolipid metabolic process;GO:0008152//metabolic process;GO:0006678//glucosylceramide metabolic process;GO:0006629//lipid metabolic process;GO:0044699//single-organism process;GO:0044763//single-organism cellular process;GO:1901564//organonitrogen compound metabolic process;GO:0044255//cellular lipid metabolic process;GO:0044238//primar…
Gene003381	CIL1476S0021	Isoform007338	CIL1476S0021	new	gbkr1	POPTRDRAFT_726104; 3-oxoacyl-[acyl-carrier-protein] reductase; K00059 3-oxoacyl-[acyl-carrier protein] reductase [EC:1.1.1.100]	Metabolism	Lipid metabolism;Metabolism of cofactors and vitamins;Global and Overview	ko01100//Metabolic pathways;ko01212//Fatty acid metabolism;ko00061//Fatty acid biosynthesis;ko01040//Biosynthesis of unsaturated fatty acids;ko00780//Biotin metabolism	K00059	GO:0043227//membrane-bounded organelle;GO:0044422//organelle part;GO:0009536//plastid;GO:0044435//plastid part;GO:0005623//cell;GO:0031975//envelope;GO:0044444//cytoplasmic part;GO:0043231//intracellular membrane-bounded organelle;GO:0031967//organelle envelope;GO:0005622//intracellular;GO:0044464//cell part;GO:0005737//cytoplasm;GO:0044424//intracellular part;GO:0044446//intracellular organelle …	GO:0046914//transition metal ion binding;GO:0005488//binding;GO:0097159//organic cyclic compound binding;GO:0016740//transferase activity;GO:0046872//metal ion binding;GO:0043167//ion binding;GO:0000166//nucleotide binding;GO:1901265//nucleoside phosphate binding;GO:0016747//transferase activity, transferring acyl groups other than amino-acyl groups;GO:0036094//small molecule binding;GO:0016746//…	GO:0050896//response to stimulus;GO:0044237//cellular metabolic process;GO:0006950//response to stress;GO:0006631//fatty acid metabolic process;GO:0006082//organic acid metabolic process;GO:0007275//multicellular organism development;GO:0032502//developmental process;GO:0044699//single-organism process;GO:0044255//cellular lipid metabolic process;GO:0071704//organic substance metabolic process;GO…
Gene003381	CIL1476S0021	Isoform007339	CIL1476S0021	new	gbkr1	POPTRDRAFT_726104; 3-oxoacyl-[acyl-carrier-protein] reductase; K00059 3-oxoacyl-[acyl-carrier protein] reductase [EC:1.1.1.100]	Metabolism	Metabolism of cofactors and vitamins;Lipid metabolism;Global and Overview	ko01100//Metabolic pathways;ko01212//Fatty acid metabolism;ko00061//Fatty acid biosynthesis;ko01040//Biosynthesis of unsaturated fatty acids;ko00780//Biotin metabolism	K00059	GO:0009536//plastid;GO:0005737//cytoplasm;GO:0043227//membrane-bounded organelle;GO:0005623//cell;GO:0043231//intracellular membrane-bounded organelle;GO:0044446//intracellular organelle part;GO:0031967//organelle envelope;GO:0031975//envelope;GO:0009526//plastid envelope;GO:0044464//cell part;GO:0005622//intracellular;GO:0043226//organelle;GO:0044422//organelle part;GO:0044444//cytoplasmic part;…	GO:0005488//binding;GO:0004312//fatty acid synthase activity;GO:0000166//nucleotide binding;GO:0003824//catalytic activity;GO:0016747//transferase activity, transferring acyl groups other than amino-acyl groups;GO:1901265//nucleoside phosphate binding;GO:0016740//transferase activity;GO:0046914//transition metal ion binding;GO:0097159//organic cyclic compound binding;GO:1901363//heterocyclic comp…	GO:0006950//response to stress;GO:0007275//multicellular organism development;GO:0050896//response to stimulus;GO:0043436//oxoacid metabolic process;GO:0044763//single-organism cellular process;GO:0044237//cellular metabolic process;GO:0044238//primary metabolic process;GO:0008152//metabolic process;GO:0006631//fatty acid metabolic process;GO:0009987//cellular process;GO:0044707//single-multicell…
Gene003381	CIL1476S0021	Isoform007340	CIL1476S0021	new	gbkr1	POPTRDRAFT_726104; 3-oxoacyl-[acyl-carrier-protein] reductase; K00059 3-oxoacyl-[acyl-carrier protein] reductase [EC:1.1.1.100]	Metabolism	Metabolism of cofactors and vitamins;Lipid metabolism;Global and Overview	ko01100//Metabolic pathways;ko01212//Fatty acid metabolism;ko00061//Fatty acid biosynthesis;ko01040//Biosynthesis of unsaturated fatty acids;ko00780//Biotin metabolism	K00059	GO:0043229//intracellular organelle;GO:0031967//organelle envelope;GO:0031975//envelope;GO:0044444//cytoplasmic part;GO:0044446//intracellular organelle part;GO:0044435//plastid part;GO:0044464//cell part;GO:0009536//plastid;GO:0043226//organelle;GO:0043231//intracellular membrane-bounded organelle;GO:0005622//intracellular;GO:0043227//membrane-bounded organelle;GO:0044424//intracellular part;GO:…	GO:0043167//ion binding;GO:0000166//nucleotide binding;GO:0097159//organic cyclic compound binding;GO:0004312//fatty acid synthase activity;GO:0046872//metal ion binding;GO:0043169//cation binding;GO:0005488//binding;GO:1901265//nucleoside phosphate binding;GO:0003824//catalytic activity;GO:0016740//transferase activity;GO:0016746//transferase activity, transferring acyl groups;GO:0036094//small …	GO:0019752//carboxylic acid metabolic process;GO:0006631//fatty acid metabolic process;GO:0008152//metabolic process;GO:0006629//lipid metabolic process;GO:0050896//response to stimulus;GO:0044710//single-organism metabolic process;GO:0032501//multicellular organismal process;GO:0009987//cellular process;GO:0071704//organic substance metabolic process;GO:0044707//single-multicellular organism pro…
Gene002813	CIL1434S0010	Isoform006159	CIL1434S0010	known	GGT1	PREDICTED: gamma-glutamyltranspeptidase 1 [Juglans regia]	Metabolism	Metabolism of other amino acids;Lipid metabolism;Global and Overview	ko01100//Metabolic pathways;ko00480//Glutathione metabolism;ko00460//Cyanoamino acid metabolism;ko00430//Taurine and hypotaurine metabolism;ko00590//Arachidonic acid metabolism	K18592	-	-	GO:0009987//cellular process;GO:0008152//metabolic process;GO:0044237//cellular metabolic process;GO:0006790//sulfur compound metabolic process
Gene000088	CIL1259S0081	Isoform000194	CIL1259S0081	new	GGT3	gamma-glutamyltranspeptidase 3; K18592 gamma-glutamyltranspeptidase / glutathione hydrolase / leukotriene-C4 hydrolase [EC:2.3.2.2 3.4.19.13 3.4.19.14]	Metabolism	Global and Overview;Lipid metabolism;Metabolism of other amino acids	ko01100//Metabolic pathways;ko00480//Glutathione metabolism;ko00460//Cyanoamino acid metabolism;ko00430//Taurine and hypotaurine metabolism;ko00590//Arachidonic acid metabolism	K18592	-	-	-
Gene004928	CIL0146S0014	Isoform010842	CIL0146S0014	known	GGT3	PREDICTED: gamma-glutamyltranspeptidase 3-like [Juglans regia]	Metabolism	Global and Overview;Metabolism of other amino acids;Lipid metabolism	ko01100//Metabolic pathways;ko00480//Glutathione metabolism;ko00460//Cyanoamino acid metabolism;ko00430//Taurine and hypotaurine metabolism;ko00590//Arachidonic acid metabolism	K18592	GO:0043227//membrane-bounded organelle;GO:0044464//cell part;GO:0044424//intracellular part;GO:0031224//intrinsic component of membrane;GO:0016020//membrane;GO:0005622//intracellular;GO:0044422//organelle part;GO:0043226//organelle;GO:0031090//organelle membrane;GO:0005623//cell;GO:0043229//intracellular organelle;GO:0044425//membrane part;GO:0043231//intracellular membrane-bounded organelle	GO:0008238//exopeptidase activity;GO:0016740//transferase activity;GO:0016755//transferase activity, transferring amino-acyl groups;GO:0008233//peptidase activity;GO:0003824//catalytic activity;GO:0016787//hydrolase activity;GO:0070011//peptidase activity, acting on L-amino acid peptides;GO:0016746//transferase activity, transferring acyl groups;GO:0008242//omega peptidase activity	GO:0008152//metabolic process;GO:0042221//response to chemical;GO:0043170//macromolecule metabolic process;GO:0006807//nitrogen compound metabolic process;GO:0071704//organic substance metabolic process;GO:0043603//cellular amide metabolic process;GO:0019538//protein metabolic process;GO:0044237//cellular metabolic process;GO:0006790//sulfur compound metabolic process;GO:1901564//organonitrogen c…
Gene004928	CIL0146S0014	Isoform010843	CIL0146S0014	new	GGT3	gamma-glutamyltranspeptidase 3; K18592 gamma-glutamyltranspeptidase / glutathione hydrolase / leukotriene-C4 hydrolase [EC:2.3.2.2 3.4.19.13 3.4.19.14]	Metabolism	Metabolism of other amino acids;Lipid metabolism;Global and Overview	ko01100//Metabolic pathways;ko00480//Glutathione metabolism;ko00460//Cyanoamino acid metabolism;ko00430//Taurine and hypotaurine metabolism;ko00590//Arachidonic acid metabolism	K18592	-	-	-
Gene004928	CIL0146S0014	Isoform010844	CIL0146S0014	new	GGT3	gamma-glutamyltranspeptidase 3; K18592 gamma-glutamyltranspeptidase / glutathione hydrolase / leukotriene-C4 hydrolase [EC:2.3.2.2 3.4.19.13 3.4.19.14]	Metabolism	Global and Overview;Lipid metabolism;Metabolism of other amino acids	ko01100//Metabolic pathways;ko00480//Glutathione metabolism;ko00460//Cyanoamino acid metabolism;ko00430//Taurine and hypotaurine metabolism;ko00590//Arachidonic acid metabolism	K18592	GO:0044422//organelle part;GO:0044424//intracellular part;GO:0043226//organelle;GO:0031090//organelle membrane;GO:0043231//intracellular membrane-bounded organelle;GO:0031224//intrinsic component of membrane;GO:0005622//intracellular;GO:0016020//membrane;GO:0043227//membrane-bounded organelle;GO:0005623//cell;GO:0043229//intracellular organelle;GO:0044464//cell part;GO:0044425//membrane part	GO:0008238//exopeptidase activity;GO:0008233//peptidase activity;GO:0016746//transferase activity, transferring acyl groups;GO:0016787//hydrolase activity;GO:0016755//transferase activity, transferring amino-acyl groups;GO:0003824//catalytic activity;GO:0016740//transferase activity;GO:0008242//omega peptidase activity;GO:0070011//peptidase activity, acting on L-amino acid peptides	GO:0006518//peptide metabolic process;GO:1901564//organonitrogen compound metabolic process;GO:0042221//response to chemical;GO:0043170//macromolecule metabolic process;GO:0006749//glutathione metabolic process;GO:0043603//cellular amide metabolic process;GO:0006575//cellular modified amino acid metabolic process;GO:0044237//cellular metabolic process;GO:0034641//cellular nitrogen compound metabo…
Gene009145	CIL0957S0186	Isoform020189	CIL0957S0186	new	GLPK	glycerol kinase; K00864 glycerol kinase [EC:2.7.1.30]	Organismal Systems;Metabolism	Lipid metabolism;Environmental adaptation;Global and Overview	ko01100//Metabolic pathways;ko04626//Plant-pathogen interaction;ko00561//Glycerolipid metabolism	K00864	GO:0044464//cell part;GO:0005622//intracellular;GO:0005737//cytoplasm;GO:0005623//cell;GO:0044424//intracellular part;GO:0044444//cytoplasmic part	GO:0016301//kinase activity;GO:0032550//purine ribonucleoside binding;GO:0097367//carbohydrate derivative binding;GO:0097159//organic cyclic compound binding;GO:0005488//binding;GO:0003824//catalytic activity;GO:0001883//purine nucleoside binding;GO:0001882//nucleoside binding;GO:0016772//transferase activity, transferring phosphorus-containing groups;GO:0036094//small molecule binding;GO:0032549…	GO:0044242//cellular lipid catabolic process;GO:0019400//alditol metabolic process;GO:0019752//carboxylic acid metabolic process;GO:0019751//polyol metabolic process;GO:0006082//organic acid metabolic process;GO:1901615//organic hydroxy compound metabolic process;GO:0019637//organophosphate metabolic process;GO:0044710//single-organism metabolic process;GO:0044712//single-organism catabolic proce…
Gene009145	CIL0957S0186	Isoform020190	CIL0957S0186	new	GLPK	Actin-like ATPase superfamily protein isoform 1; K00864 glycerol kinase [EC:2.7.1.30]	Organismal Systems;Metabolism	Global and Overview;Lipid metabolism;Environmental adaptation	ko01100//Metabolic pathways;ko04626//Plant-pathogen interaction;ko00561//Glycerolipid metabolism	K00864	GO:0005623//cell;GO:0005737//cytoplasm;GO:0044464//cell part;GO:0044424//intracellular part;GO:0005622//intracellular;GO:0044444//cytoplasmic part	GO:0003824//catalytic activity;GO:0036094//small molecule binding;GO:0016740//transferase activity;GO:0032550//purine ribonucleoside binding;GO:0001882//nucleoside binding;GO:1901363//heterocyclic compound binding;GO:0005488//binding;GO:0001883//purine nucleoside binding;GO:0097367//carbohydrate derivative binding;GO:0032549//ribonucleoside binding;GO:0016772//transferase activity, transferring p…	GO:0009617//response to bacterium;GO:0006950//response to stress;GO:0005975//carbohydrate metabolic process;GO:0043436//oxoacid metabolic process;GO:0009605//response to external stimulus;GO:0009056//catabolic process;GO:0044248//cellular catabolic process;GO:0019400//alditol metabolic process;GO:0019637//organophosphate metabolic process;GO:0009987//cellular process;GO:0046395//carboxylic acid c…
Gene005941	CIL0385S0028	Isoform013113	CIL0385S0028	known	GLYK	PREDICTED: D-glycerate 3-kinase, chloroplastic [Juglans regia]	Metabolism	Global and Overview;Carbohydrate metabolism;Lipid metabolism;Amino acid metabolism	ko01100//Metabolic pathways;ko01110//Biosynthesis of secondary metabolites;ko01200//Carbon metabolism;ko00630//Glyoxylate and dicarboxylate metabolism;ko00561//Glycerolipid metabolism;ko00260//Glycine, serine and threonine metabolism	K15918	GO:0031975//envelope;GO:0044444//cytoplasmic part;GO:0043229//intracellular organelle;GO:0043227//membrane-bounded organelle;GO:0044446//intracellular organelle part;GO:0009532//plastid stroma;GO:0044435//plastid part;GO:0005623//cell;GO:0009526//plastid envelope;GO:0043231//intracellular membrane-bounded organelle;GO:0044422//organelle part;GO:0044464//cell part;GO:0005737//cytoplasm;GO:0044424/…	GO:0032549//ribonucleoside binding;GO:0036094//small molecule binding;GO:0097159//organic cyclic compound binding;GO:0003824//catalytic activity;GO:0001882//nucleoside binding;GO:0005488//binding;GO:1901363//heterocyclic compound binding;GO:0001883//purine nucleoside binding;GO:0097367//carbohydrate derivative binding;GO:0016740//transferase activity;GO:0032550//purine ribonucleoside binding;GO:0…	GO:0044249//cellular biosynthetic process;GO:0009853//photorespiration;GO:0009058//biosynthetic process;GO:0043094//cellular metabolic compound salvage;GO:0009987//cellular process;GO:0006796//phosphate-containing compound metabolic process;GO:0044237//cellular metabolic process;GO:0008152//metabolic process;GO:0006793//phosphorus metabolic process
Gene015422	CIL1192S0008	Isoform034574	CIL1192S0008	new	GPAT6	ER glycerol-phosphate acyltransferase; K13508 glycerol-3-phosphate acyltransferase [EC:2.3.1.15]	Metabolism	Lipid metabolism;Global and Overview	ko01100//Metabolic pathways;ko01110//Biosynthesis of secondary metabolites;ko00564//Glycerophospholipid metabolism;ko00561//Glycerolipid metabolism	K13508	-	-	-
Gene009708	CIL0982S0002	Isoform021630	CIL0982S0002	new	GPAT8	probable glycerol-3-phosphate acyltransferase 8; K13508 glycerol-3-phosphate acyltransferase [EC:2.3.1.15]	Metabolism	Lipid metabolism;Global and Overview	ko01100//Metabolic pathways;ko01110//Biosynthesis of secondary metabolites;ko00564//Glycerophospholipid metabolism;ko00561//Glycerolipid metabolism	K13508	-	-	-
Gene007886	CIL0922S0157	Isoform017377	CIL0922S0157	new	GPDH	glycerol-3-phosphate dehydrogenase [NAD(+)]-like; K00006 glycerol-3-phosphate dehydrogenase (NAD+) [EC:1.1.1.8]	Metabolism	Lipid metabolism;Global and Overview	ko01110//Biosynthesis of secondary metabolites;ko00564//Glycerophospholipid metabolism	K00006	GO:0005623//cell;GO:0005622//intracellular;GO:0005737//cytoplasm;GO:0044444//cytoplasmic part;GO:0044464//cell part;GO:0044424//intracellular part	GO:0005515//protein binding;GO:0048037//cofactor binding;GO:0003824//catalytic activity;GO:0046983//protein dimerization activity;GO:0016491//oxidoreductase activity;GO:0036094//small molecule binding;GO:0097159//organic cyclic compound binding;GO:0005488//binding;GO:1901363//heterocyclic compound binding;GO:1901265//nucleoside phosphate binding;GO:0000166//nucleotide binding;GO:0016614//oxidored…	GO:0008152//metabolic process;GO:0006793//phosphorus metabolic process;GO:0071704//organic substance metabolic process;GO:0052646//alditol phosphate metabolic process;GO:0009987//cellular process;GO:1901135//carbohydrate derivative metabolic process;GO:0044238//primary metabolic process;GO:0044710//single-organism metabolic process;GO:0044237//cellular metabolic process;GO:0006796//phosphate-cont…
Gene007886	CIL0922S0157	Isoform017378	CIL0922S0157	new	GPDH	NAD-dependent glycerol-3-phosphate dehydrogenase family protein; K00006 glycerol-3-phosphate dehydrogenase (NAD+) [EC:1.1.1.8]	Metabolism	Lipid metabolism;Global and Overview	ko01110//Biosynthesis of secondary metabolites;ko00564//Glycerophospholipid metabolism	K00006	-	-	-
Gene007886	CIL0922S0157	Isoform017379	CIL0922S0157	new	GPDH	glycerol-3-phosphate dehydrogenase [NAD(+)]-like; K00006 glycerol-3-phosphate dehydrogenase (NAD+) [EC:1.1.1.8]	Metabolism	Lipid metabolism;Global and Overview	ko01110//Biosynthesis of secondary metabolites;ko00564//Glycerophospholipid metabolism	K00006	GO:0005737//cytoplasm;GO:0005622//intracellular;GO:0044444//cytoplasmic part;GO:0005623//cell;GO:0044464//cell part;GO:0044424//intracellular part	GO:0000166//nucleotide binding;GO:0005515//protein binding;GO:0016614//oxidoreductase activity, acting on CH-OH group of donors;GO:0005488//binding;GO:0046983//protein dimerization activity;GO:1901363//heterocyclic compound binding;GO:0016491//oxidoreductase activity;GO:0003824//catalytic activity;GO:1901265//nucleoside phosphate binding;GO:0048037//cofactor binding;GO:0097159//organic cyclic com…	GO:0071704//organic substance metabolic process;GO:0044710//single-organism metabolic process;GO:0019637//organophosphate metabolic process;GO:0044237//cellular metabolic process;GO:1901135//carbohydrate derivative metabolic process;GO:0008152//metabolic process;GO:0006793//phosphorus metabolic process;GO:0006072//glycerol-3-phosphate metabolic process;GO:0052646//alditol phosphate metabolic proc…
Gene007886	CIL0922S0157	Isoform017380	CIL0922S0157	new	GPDH	NAD-dependent glycerol-3-phosphate dehydrogenase family protein; K00006 glycerol-3-phosphate dehydrogenase (NAD+) [EC:1.1.1.8]	Metabolism	Global and Overview;Lipid metabolism	ko01110//Biosynthesis of secondary metabolites;ko00564//Glycerophospholipid metabolism	K00006	GO:0044424//intracellular part;GO:0005623//cell;GO:0044444//cytoplasmic part;GO:0044464//cell part;GO:0005737//cytoplasm;GO:0005622//intracellular	GO:0046983//protein dimerization activity;GO:0005488//binding;GO:0016491//oxidoreductase activity;GO:0036094//small molecule binding;GO:1901265//nucleoside phosphate binding;GO:0016614//oxidoreductase activity, acting on CH-OH group of donors;GO:1901363//heterocyclic compound binding;GO:0003824//catalytic activity;GO:0097159//organic cyclic compound binding;GO:0000166//nucleotide binding;GO:00480…	GO:0044699//single-organism process;GO:0006796//phosphate-containing compound metabolic process;GO:0052646//alditol phosphate metabolic process;GO:0044237//cellular metabolic process;GO:1901135//carbohydrate derivative metabolic process;GO:0008152//metabolic process;GO:0006072//glycerol-3-phosphate metabolic process;GO:0006793//phosphorus metabolic process;GO:0044238//primary metabolic process;GO…
Gene007886	CIL0922S0157	Isoform017381	CIL0922S0157	new	GPDH	glycerol-3-phosphate dehydrogenase [NAD(+)]-like; K00006 glycerol-3-phosphate dehydrogenase (NAD+) [EC:1.1.1.8]	Metabolism	Global and Overview;Lipid metabolism	ko01110//Biosynthesis of secondary metabolites;ko00564//Glycerophospholipid metabolism	K00006	GO:0005622//intracellular;GO:0044464//cell part;GO:0005623//cell;GO:0044444//cytoplasmic part;GO:0044424//intracellular part;GO:0005737//cytoplasm	GO:1901363//heterocyclic compound binding;GO:0036094//small molecule binding;GO:0046983//protein dimerization activity;GO:0048037//cofactor binding;GO:0000166//nucleotide binding;GO:0097159//organic cyclic compound binding;GO:0005488//binding;GO:0016491//oxidoreductase activity;GO:1901265//nucleoside phosphate binding;GO:0005515//protein binding;GO:0003824//catalytic activity;GO:0016614//oxidored…	GO:0071704//organic substance metabolic process;GO:0006796//phosphate-containing compound metabolic process;GO:0019637//organophosphate metabolic process;GO:0044710//single-organism metabolic process;GO:0044237//cellular metabolic process;GO:0044238//primary metabolic process;GO:0006072//glycerol-3-phosphate metabolic process;GO:0006793//phosphorus metabolic process;GO:0009987//cellular process;G…
Gene004736	CIL1596S0004	Isoform010435	CIL1596S0004	known	GPDHC1	PREDICTED: glycerol-3-phosphate dehydrogenase [NAD(+)] GPDHC1, cytosolic [Juglans regia]	Metabolism	Global and Overview;Lipid metabolism	ko01110//Biosynthesis of secondary metabolites;ko00564//Glycerophospholipid metabolism	K00006	-	-	-
Gene000787	CIL1300S0062	Isoform001619	CIL1300S0062	known	GPX1	PREDICTED: probable phospholipid hydroperoxide glutathione peroxidase [Juglans regia]	Metabolism	Lipid metabolism;Metabolism of other amino acids	ko00480//Glutathione metabolism;ko00590//Arachidonic acid metabolism	K00432	-	GO:0016684//oxidoreductase activity, acting on peroxide as acceptor;GO:0016491//oxidoreductase activity;GO:0016209//antioxidant activity;GO:0004601//peroxidase activity;GO:0003824//catalytic activity	GO:0006950//response to stress;GO:0044710//single-organism metabolic process;GO:0044699//single-organism process;GO:0008152//metabolic process;GO:0050896//response to stimulus
Gene011072	CIL1031S0110,CIL1031S0115,CIL1031S0117,CIL1031S0119,CIL1031S0122	Isoform024617	CIL1031S0122	new	GPX1	phospholipid hydroperoxide glutathione peroxidase 1, chloroplastic; K00432 glutathione peroxidase [EC:1.11.1.9]	Metabolism	Metabolism of other amino acids;Lipid metabolism	ko00480//Glutathione metabolism;ko00590//Arachidonic acid metabolism	K00432	-	GO:0004601//peroxidase activity;GO:0016209//antioxidant activity;GO:0016684//oxidoreductase activity, acting on peroxide as acceptor;GO:0003824//catalytic activity;GO:0016491//oxidoreductase activity	GO:0044710//single-organism metabolic process;GO:0044699//single-organism process;GO:0006950//response to stress;GO:0008152//metabolic process;GO:0050896//response to stimulus
Gene006032	CIL0413S0004	Isoform013310	CIL0413S0004	new	GPX3	probable phospholipid hydroperoxide glutathione peroxidase; K00432 glutathione peroxidase [EC:1.11.1.9]	Metabolism	Metabolism of other amino acids;Lipid metabolism	ko00480//Glutathione metabolism;ko00590//Arachidonic acid metabolism	K00432	GO:0043231//intracellular membrane-bounded organelle;GO:0044424//intracellular part;GO:0031984//organelle subcompartment;GO:0005623//cell;GO:0005622//intracellular;GO:0043226//organelle;GO:0044464//cell part;GO:0043227//membrane-bounded organelle;GO:0043229//intracellular organelle;GO:0044446//intracellular organelle part;GO:0044422//organelle part	GO:0003824//catalytic activity;GO:0016491//oxidoreductase activity;GO:0004601//peroxidase activity;GO:0016209//antioxidant activity;GO:0016684//oxidoreductase activity, acting on peroxide as acceptor	GO:0009404//toxin metabolic process;GO:0044710//single-organism metabolic process;GO:0071310//cellular response to organic substance;GO:0009415//response to water;GO:0009987//cellular process;GO:0044237//cellular metabolic process;GO:0065007//biological regulation;GO:0000302//response to reactive oxygen species;GO:0050896//response to stimulus;GO:0051716//cellular response to stimulus;GO:0006950/…
Gene003668	CIL1497S0048	Isoform008007	CIL1497S0048	known	GPX6	PREDICTED: probable phospholipid hydroperoxide glutathione peroxidase [Juglans regia]	Metabolism	Lipid metabolism;Metabolism of other amino acids	ko00480//Glutathione metabolism;ko00590//Arachidonic acid metabolism	K00432	GO:0005622//intracellular;GO:0043227//membrane-bounded organelle;GO:0005623//cell;GO:0043231//intracellular membrane-bounded organelle;GO:0044464//cell part;GO:0043226//organelle;GO:0005737//cytoplasm;GO:0044444//cytoplasmic part;GO:0044424//intracellular part;GO:0043229//intracellular organelle	GO:0016209//antioxidant activity;GO:0016684//oxidoreductase activity, acting on peroxide as acceptor;GO:0004601//peroxidase activity;GO:0003824//catalytic activity;GO:0016491//oxidoreductase activity	GO:0009987//cellular process;GO:0044763//single-organism cellular process;GO:0044237//cellular metabolic process;GO:0044710//single-organism metabolic process;GO:0019748//secondary metabolic process;GO:0006950//response to stress;GO:0008152//metabolic process;GO:0009404//toxin metabolic process;GO:0050896//response to stimulus;GO:0044699//single-organism process
Gene010296	CIL1001S0083	Isoform022912	CIL1001S0083	new	HACD2	very-long-chain (3R)-3-hydroxyacyl-CoA dehydratase 2; K10703 very-long-chain (3R)-3-hydroxyacyl-CoA dehydratase [EC:4.2.1.134]	Metabolism	Lipid metabolism;Global and Overview	ko01110//Biosynthesis of secondary metabolites;ko01212//Fatty acid metabolism;ko01040//Biosynthesis of unsaturated fatty acids;ko00062//Fatty acid elongation	K10703	-	-	-
Gene005258	CIL0213S0001	Isoform011564	CIL0213S0001	known	HMGCL	PREDICTED: hydroxymethylglutaryl-CoA lyase, mitochondrial [Juglans regia]	Cellular Processes;Metabolism	Carbohydrate metabolism;Amino acid metabolism;Transport and catabolism;Lipid metabolism;Global and Overview	ko01100//Metabolic pathways;ko04146//Peroxisome;ko00280//Valine, leucine and isoleucine degradation;ko00650//Butanoate metabolism;ko00072//Synthesis and degradation of ketone bodies	K01640	GO:0044424//intracellular part;GO:0044444//cytoplasmic part;GO:0005739//mitochondrion;GO:0005622//intracellular;GO:0044429//mitochondrial part;GO:0044422//organelle part;GO:0043227//membrane-bounded organelle;GO:0043226//organelle;GO:0043231//intracellular membrane-bounded organelle;GO:0043229//intracellular organelle;GO:0044446//intracellular organelle part;GO:0044464//cell part;GO:0005623//cell…	GO:0043169//cation binding;GO:0016833//oxo-acid-lyase activity;GO:0016829//lyase activity;GO:0003824//catalytic activity;GO:0016830//carbon-carbon lyase activity;GO:0043167//ion binding;GO:0005488//binding	-
Gene013888	CIL1136S0040	Isoform030948	CIL1136S0040	new	HMGCL	hydroxymethylglutaryl-CoA lyase, mitochondrial; K01640 hydroxymethylglutaryl-CoA lyase [EC:4.1.3.4]	Metabolism;Cellular Processes	Global and Overview;Transport and catabolism;Amino acid metabolism;Lipid metabolism;Carbohydrate metabolism	ko01100//Metabolic pathways;ko04146//Peroxisome;ko00280//Valine, leucine and isoleucine degradation;ko00650//Butanoate metabolism;ko00072//Synthesis and degradation of ketone bodies	K01640	-	GO:0016830//carbon-carbon lyase activity;GO:0016829//lyase activity;GO:0016833//oxo-acid-lyase activity;GO:0003824//catalytic activity	-
Gene013888	CIL1136S0040	Isoform030949	CIL1136S0040	new	HMGCL	hydroxymethylglutaryl-CoA lyase, mitochondrial; K01640 hydroxymethylglutaryl-CoA lyase [EC:4.1.3.4]	Metabolism;Cellular Processes	Lipid metabolism;Amino acid metabolism;Transport and catabolism;Carbohydrate metabolism;Global and Overview	ko01100//Metabolic pathways;ko04146//Peroxisome;ko00280//Valine, leucine and isoleucine degradation;ko00650//Butanoate metabolism;ko00072//Synthesis and degradation of ketone bodies	K01640	-	GO:0016830//carbon-carbon lyase activity;GO:0016829//lyase activity;GO:0003824//catalytic activity;GO:0016833//oxo-acid-lyase activity	-
Gene013888	CIL1136S0040	Isoform030950	CIL1136S0040	new	HMGCL	hydroxymethylglutaryl-CoA lyase, mitochondrial; K01640 hydroxymethylglutaryl-CoA lyase [EC:4.1.3.4]	Cellular Processes;Metabolism	Carbohydrate metabolism;Lipid metabolism;Amino acid metabolism;Transport and catabolism;Global and Overview	ko01100//Metabolic pathways;ko04146//Peroxisome;ko00280//Valine, leucine and isoleucine degradation;ko00650//Butanoate metabolism;ko00072//Synthesis and degradation of ketone bodies	K01640	-	GO:0003824//catalytic activity;GO:0016833//oxo-acid-lyase activity;GO:0016829//lyase activity;GO:0016830//carbon-carbon lyase activity	-
Gene013888	CIL1136S0040	Isoform030951	CIL1136S0040	new	HMGCL	hydroxymethylglutaryl-CoA lyase, mitochondrial-like; K01640 hydroxymethylglutaryl-CoA lyase [EC:4.1.3.4]	Cellular Processes;Metabolism	Global and Overview;Transport and catabolism;Amino acid metabolism;Lipid metabolism;Carbohydrate metabolism	ko01100//Metabolic pathways;ko04146//Peroxisome;ko00280//Valine, leucine and isoleucine degradation;ko00650//Butanoate metabolism;ko00072//Synthesis and degradation of ketone bodies	K01640	-	-	-
Gene016116	CIL1226S0025	Isoform036133	CIL1226S0025	new	HMGCL	hydroxymethylglutaryl-CoA lyase, mitochondrial; K01640 hydroxymethylglutaryl-CoA lyase [EC:4.1.3.4]	Cellular Processes;Metabolism	Amino acid metabolism;Transport and catabolism;Lipid metabolism;Carbohydrate metabolism;Global and Overview	ko01100//Metabolic pathways;ko04146//Peroxisome;ko00280//Valine, leucine and isoleucine degradation;ko00650//Butanoate metabolism;ko00072//Synthesis and degradation of ketone bodies	K01640	-	GO:0003824//catalytic activity	-
Gene006013	CIL0407S0007	Isoform013270	CIL0407S0007	known	HMGS	PREDICTED: hydroxymethylglutaryl-CoA synthase-like [Juglans regia]	Metabolism	Global and Overview;Amino acid metabolism;Metabolism of terpenoids and polyketides;Lipid metabolism;Carbohydrate metabolism	ko01100//Metabolic pathways;ko01110//Biosynthesis of secondary metabolites;ko00280//Valine, leucine and isoleucine degradation;ko00900//Terpenoid backbone biosynthesis;ko00650//Butanoate metabolism;ko00072//Synthesis and degradation of ketone bodies	K01641	GO:0005911//cell-cell junction;GO:0044424//intracellular part;GO:0005737//cytoplasm;GO:0044464//cell part;GO:0005622//intracellular;GO:0030054//cell junction;GO:0044444//cytoplasmic part;GO:0005623//cell	GO:0003824//catalytic activity;GO:0016740//transferase activity;GO:0046912//transferase activity, transferring acyl groups, acyl groups converted into alkyl on transfer;GO:0016746//transferase activity, transferring acyl groups	GO:0006629//lipid metabolic process;GO:0044710//single-organism metabolic process;GO:0006720//isoprenoid metabolic process;GO:0008152//metabolic process;GO:0008610//lipid biosynthetic process;GO:0044763//single-organism cellular process;GO:0008202//steroid metabolic process;GO:0006793//phosphorus metabolic process;GO:0009987//cellular process;GO:0071704//organic substance metabolic process;GO:004…
Gene006013	CIL0407S0007	Isoform013271	CIL0407S0007	new	HMGS	hydroxymethylglutaryl-CoA synthase-like; K01641 hydroxymethylglutaryl-CoA synthase [EC:2.3.3.10]	Metabolism	Carbohydrate metabolism;Amino acid metabolism;Lipid metabolism;Metabolism of terpenoids and polyketides;Global and Overview	ko01100//Metabolic pathways;ko01110//Biosynthesis of secondary metabolites;ko01130//Biosynthesis of antibiotics;ko00280//Valine, leucine and isoleucine degradation;ko00900//Terpenoid backbone biosynthesis;ko00650//Butanoate metabolism;ko00072//Synthesis and degradation of ketone bodies	K01641	GO:0044464//cell part;GO:0005623//cell;GO:0044444//cytoplasmic part;GO:0030054//cell junction;GO:0005737//cytoplasm;GO:0005622//intracellular;GO:0044424//intracellular part;GO:0005911//cell-cell junction	GO:0016740//transferase activity;GO:0046912//transferase activity, transferring acyl groups, acyl groups converted into alkyl on transfer;GO:0003824//catalytic activity;GO:0016746//transferase activity, transferring acyl groups	GO:0006637//acyl-CoA metabolic process;GO:0008152//metabolic process;GO:0008610//lipid biosynthetic process;GO:1901362//organic cyclic compound biosynthetic process;GO:1901360//organic cyclic compound metabolic process;GO:0044238//primary metabolic process;GO:0009987//cellular process;GO:0008202//steroid metabolic process;GO:0035383//thioester metabolic process;GO:0006629//lipid metabolic process…
Gene008061	CIL0923S0126	Isoform017824	CIL0923S0126	new	HMGS	Hydroxymethylglutaryl-CoA synthase / HMG-CoA synthase / 3-hydroxy-3-methylglutaryl coenzyme A synthase; K01641 hydroxymethylglutaryl-CoA synthase [EC:2.3.3.10]	Metabolism	Global and Overview;Metabolism of terpenoids and polyketides;Lipid metabolism;Amino acid metabolism;Carbohydrate metabolism	ko01100//Metabolic pathways;ko01110//Biosynthesis of secondary metabolites;ko01130//Biosynthesis of antibiotics;ko00280//Valine, leucine and isoleucine degradation;ko00900//Terpenoid backbone biosynthesis;ko00650//Butanoate metabolism;ko00072//Synthesis and degradation of ketone bodies	K01641	GO:0044444//cytoplasmic part;GO:0005623//cell;GO:0005737//cytoplasm;GO:0030054//cell junction;GO:0005911//cell-cell junction;GO:0005622//intracellular;GO:0044424//intracellular part;GO:0044464//cell part	GO:0016746//transferase activity, transferring acyl groups;GO:0046912//transferase activity, transferring acyl groups, acyl groups converted into alkyl on transfer;GO:0003824//catalytic activity;GO:0016740//transferase activity	GO:0006637//acyl-CoA metabolic process;GO:0071704//organic substance metabolic process;GO:1901576//organic substance biosynthetic process;GO:0008202//steroid metabolic process;GO:0035383//thioester metabolic process;GO:0044238//primary metabolic process;GO:0006793//phosphorus metabolic process;GO:1901360//organic cyclic compound metabolic process;GO:0044710//single-organism metabolic process;GO:0…
Gene008061	CIL0923S0126	Isoform017825	CIL0923S0126	new	HMGS	Hydroxymethylglutaryl-CoA synthase / HMG-CoA synthase / 3-hydroxy-3-methylglutaryl coenzyme A synthase; K01641 hydroxymethylglutaryl-CoA synthase [EC:2.3.3.10]	Metabolism	Global and Overview;Metabolism of terpenoids and polyketides;Lipid metabolism;Amino acid metabolism;Carbohydrate metabolism	ko01100//Metabolic pathways;ko01110//Biosynthesis of secondary metabolites;ko01130//Biosynthesis of antibiotics;ko00280//Valine, leucine and isoleucine degradation;ko00900//Terpenoid backbone biosynthesis;ko00650//Butanoate metabolism;ko00072//Synthesis and degradation of ketone bodies	K01641	GO:0005737//cytoplasm;GO:0044424//intracellular part;GO:0005911//cell-cell junction;GO:0044464//cell part;GO:0030054//cell junction;GO:0044444//cytoplasmic part;GO:0005622//intracellular;GO:0005623//cell	GO:0003824//catalytic activity;GO:0016740//transferase activity;GO:0016746//transferase activity, transferring acyl groups;GO:0046912//transferase activity, transferring acyl groups, acyl groups converted into alkyl on transfer	GO:0008202//steroid metabolic process;GO:0008152//metabolic process;GO:0009058//biosynthetic process;GO:0044710//single-organism metabolic process;GO:0044255//cellular lipid metabolic process;GO:0044237//cellular metabolic process;GO:0009987//cellular process;GO:0006084//acetyl-CoA metabolic process;GO:0051186//cofactor metabolic process;GO:1901576//organic substance biosynthetic process;GO:19013…
Gene001064	CIL1317S0065	Isoform002270	CIL1317S0065	known	HTH	PREDICTED: protein HOTHEAD-like [Juglans regia]	Metabolism	Lipid metabolism	ko00073//Cutin, suberine and wax biosynthesis	K15403	-	GO:1901363//heterocyclic compound binding;GO:0005488//binding;GO:0016829//lyase activity;GO:0097159//organic cyclic compound binding;GO:0016830//carbon-carbon lyase activity;GO:1901265//nucleoside phosphate binding;GO:0000166//nucleotide binding;GO:0016832//aldehyde-lyase activity;GO:0003824//catalytic activity;GO:0016614//oxidoreductase activity, acting on CH-OH group of donors;GO:0016491//oxido…	GO:0044710//single-organism metabolic process;GO:0048229//gametophyte development;GO:0044255//cellular lipid metabolic process;GO:0043436//oxoacid metabolic process;GO:0032501//multicellular organismal process;GO:0006629//lipid metabolic process;GO:0044699//single-organism process;GO:0034440//lipid oxidation;GO:0007154//cell communication;GO:0008152//metabolic process;GO:0071704//organic substanc…
Gene006038	CIL0046S0009,CIL0046S0013,CIL0046S0014	Isoform013321	CIL0046S0014	new	IBR3	acyl-CoA dehydrogenase family member 10-like; K00249 acyl-CoA dehydrogenase [EC:1.3.8.7]	Metabolism	Amino acid metabolism;Lipid metabolism;Metabolism of other amino acids;Carbohydrate metabolism;Global and Overview	ko01100//Metabolic pathways;ko01110//Biosynthesis of secondary metabolites;ko01130//Biosynthesis of antibiotics;ko01200//Carbon metabolism;ko01212//Fatty acid metabolism;ko00071//Fatty acid degradation;ko00280//Valine, leucine and isoleucine degradation;ko00640//Propanoate metabolism;ko00410//beta-Alanine metabolism	K00249	-	GO:0016740//transferase activity;GO:0003824//catalytic activity;GO:0036094//small molecule binding;GO:0097159//organic cyclic compound binding;GO:0005488//binding;GO:0000166//nucleotide binding;GO:0016491//oxidoreductase activity;GO:1901265//nucleoside phosphate binding;GO:1901363//heterocyclic compound binding	GO:0009608//response to symbiont;GO:0040007//growth;GO:0044763//single-organism cellular process;GO:0048468//cell development;GO:0048588//developmental cell growth;GO:0009607//response to biotic stimulus;GO:0044699//single-organism process;GO:0048869//cellular developmental process;GO:0051704//multi-organism process;GO:0009987//cellular process;GO:0030154//cell differentiation;GO:0016049//cell gr…
Gene006038	CIL0046S0009,CIL0046S0013,CIL0046S0014	Isoform013322	CIL0046S0014	new	IBR3	acyl-CoA dehydrogenase family member 10; K00249 acyl-CoA dehydrogenase [EC:1.3.8.7]	Metabolism	Global and Overview;Carbohydrate metabolism;Amino acid metabolism;Metabolism of other amino acids;Lipid metabolism	ko01100//Metabolic pathways;ko01110//Biosynthesis of secondary metabolites;ko01130//Biosynthesis of antibiotics;ko01200//Carbon metabolism;ko01212//Fatty acid metabolism;ko00071//Fatty acid degradation;ko00280//Valine, leucine and isoleucine degradation;ko00640//Propanoate metabolism;ko00410//beta-Alanine metabolism	K00249	-	GO:0036094//small molecule binding;GO:0003824//catalytic activity;GO:0000166//nucleotide binding;GO:0097159//organic cyclic compound binding;GO:1901363//heterocyclic compound binding;GO:0016491//oxidoreductase activity;GO:0005488//binding;GO:1901265//nucleoside phosphate binding;GO:0016740//transferase activity	GO:0044710//single-organism metabolic process;GO:0044699//single-organism process;GO:0008152//metabolic process
Gene006038	CIL0046S0009,CIL0046S0013,CIL0046S0014	Isoform013325	CIL0046S0014	known	IBR3	PREDICTED: probable acyl-CoA dehydrogenase IBR3 [Juglans regia]	Metabolism	Global and Overview;Amino acid metabolism;Metabolism of other amino acids;Lipid metabolism;Carbohydrate metabolism	ko01100//Metabolic pathways;ko01110//Biosynthesis of secondary metabolites;ko01200//Carbon metabolism;ko01212//Fatty acid metabolism;ko00071//Fatty acid degradation;ko00280//Valine, leucine and isoleucine degradation;ko00640//Propanoate metabolism;ko00410//beta-Alanine metabolism	K00249	-	GO:0016491//oxidoreductase activity;GO:0000166//nucleotide binding;GO:1901363//heterocyclic compound binding;GO:0003824//catalytic activity;GO:0097159//organic cyclic compound binding;GO:0005488//binding;GO:0036094//small molecule binding;GO:1901265//nucleoside phosphate binding;GO:0016740//transferase activity	GO:0044710//single-organism metabolic process;GO:0016049//cell growth;GO:0043207//response to external biotic stimulus;GO:0044767//single-organism developmental process;GO:0044763//single-organism cellular process;GO:0032502//developmental process;GO:0009607//response to biotic stimulus;GO:0009987//cellular process;GO:0040007//growth;GO:0048589//developmental growth;GO:0050896//response to stimul…
Gene006038	CIL0046S0009,CIL0046S0013,CIL0046S0014	Isoform013326	CIL0046S0014	new	IBR3	Acyl-CoA dehydrogenase-related isoform 1; K00249 acyl-CoA dehydrogenase [EC:1.3.8.7]	Metabolism	Global and Overview;Carbohydrate metabolism;Lipid metabolism;Metabolism of other amino acids;Amino acid metabolism	ko01100//Metabolic pathways;ko01110//Biosynthesis of secondary metabolites;ko01130//Biosynthesis of antibiotics;ko01200//Carbon metabolism;ko01212//Fatty acid metabolism;ko00071//Fatty acid degradation;ko00280//Valine, leucine and isoleucine degradation;ko00640//Propanoate metabolism;ko00410//beta-Alanine metabolism	K00249	-	GO:0036094//small molecule binding;GO:1901265//nucleoside phosphate binding;GO:1901363//heterocyclic compound binding;GO:0005488//binding;GO:0000166//nucleotide binding;GO:0097159//organic cyclic compound binding;GO:0016491//oxidoreductase activity;GO:0003824//catalytic activity;GO:0016740//transferase activity	GO:0048468//cell development;GO:0044699//single-organism process;GO:0009608//response to symbiont;GO:0044763//single-organism cellular process;GO:0040007//growth;GO:0044767//single-organism developmental process;GO:0051707//response to other organism;GO:0048589//developmental growth;GO:0048588//developmental cell growth;GO:0050896//response to stimulus;GO:0009607//response to biotic stimulus;GO:0…
Gene001088	CIL1317S0072,CIL1317S0073	Isoform002309	CIL1317S0073	new	IDD11	Beta-galactosidase 17; K12309 beta-galactosidase [EC:3.2.1.23]	Metabolism	Lipid metabolism;Carbohydrate metabolism;Glycan biosynthesis and metabolism;Global and Overview	ko01100//Metabolic pathways;ko00052//Galactose metabolism;ko00600//Sphingolipid metabolism;ko00511//Other glycan degradation;ko00531//Glycosaminoglycan degradation;ko00604//Glycosphingolipid biosynthesis - ganglio series	K12309	GO:0005576//extracellular region	GO:0043169//cation binding;GO:0016798//hydrolase activity, acting on glycosyl bonds;GO:0043167//ion binding;GO:0004553//hydrolase activity, hydrolyzing O-glycosyl compounds;GO:0005488//binding;GO:0015925//galactosidase activity;GO:0016787//hydrolase activity;GO:0003824//catalytic activity	GO:0010383//cell wall polysaccharide metabolic process;GO:0005976//polysaccharide metabolic process;GO:0043170//macromolecule metabolic process;GO:0006464//cellular protein modification process;GO:0003006//developmental process involved in reproduction;GO:0072593//reactive oxygen species metabolic process;GO:0071704//organic substance metabolic process;GO:0000003//reproduction;GO:0043412//macromo…
Gene001088	CIL1317S0072,CIL1317S0073	Isoform002319	CIL1317S0073	new	IDD11	beta-galactosidase 17; K12309 beta-galactosidase [EC:3.2.1.23]	Metabolism	Global and Overview;Lipid metabolism;Carbohydrate metabolism;Glycan biosynthesis and metabolism	ko01100//Metabolic pathways;ko00052//Galactose metabolism;ko00600//Sphingolipid metabolism;ko00511//Other glycan degradation;ko00531//Glycosaminoglycan degradation;ko00604//Glycosphingolipid biosynthesis - ganglio series	K12309	-	-	-
Gene013670	CIL1131S0058	Isoform030508	CIL1131S0058	new	IDD11	beta-galactosidase 17; K12309 beta-galactosidase [EC:3.2.1.23]	Metabolism	Global and Overview;Lipid metabolism;Glycan biosynthesis and metabolism;Carbohydrate metabolism	ko01100//Metabolic pathways;ko00052//Galactose metabolism;ko00600//Sphingolipid metabolism;ko00511//Other glycan degradation;ko00531//Glycosaminoglycan degradation;ko00604//Glycosphingolipid biosynthesis - ganglio series	K12309	-	-	-
Gene001088	CIL1317S0072,CIL1317S0073	Isoform002310	CIL1317S0073	new	IDD7	beta-galactosidase 17; K12309 beta-galactosidase [EC:3.2.1.23]	Metabolism	Lipid metabolism;Carbohydrate metabolism;Glycan biosynthesis and metabolism;Global and Overview	ko01100//Metabolic pathways;ko00052//Galactose metabolism;ko00600//Sphingolipid metabolism;ko00511//Other glycan degradation;ko00531//Glycosaminoglycan degradation;ko00604//Glycosphingolipid biosynthesis - ganglio series	K12309	-	-	-
Gene001088	CIL1317S0072,CIL1317S0073	Isoform002311	CIL1317S0073	new	IDD7	beta-galactosidase 17; K12309 beta-galactosidase [EC:3.2.1.23]	Metabolism	Lipid metabolism;Glycan biosynthesis and metabolism;Carbohydrate metabolism;Global and Overview	ko01100//Metabolic pathways;ko00052//Galactose metabolism;ko00600//Sphingolipid metabolism;ko00511//Other glycan degradation;ko00531//Glycosaminoglycan degradation;ko00604//Glycosphingolipid biosynthesis - ganglio series	K12309	-	-	-
Gene001088	CIL1317S0072,CIL1317S0073	Isoform002312	CIL1317S0073	new	IDD7	beta-galactosidase 17; K12309 beta-galactosidase [EC:3.2.1.23]	Metabolism	Lipid metabolism;Carbohydrate metabolism;Glycan biosynthesis and metabolism;Global and Overview	ko01100//Metabolic pathways;ko00052//Galactose metabolism;ko00600//Sphingolipid metabolism;ko00511//Other glycan degradation;ko00531//Glycosaminoglycan degradation;ko00604//Glycosphingolipid biosynthesis - ganglio series	K12309	-	-	-
Gene014317	CIL1148S0019	Isoform031942	CIL1148S0019	new	JMT	7-methylxanthosine synthase 1-like; K08241 jasmonate O-methyltransferase [EC:2.1.1.141]	Metabolism	Global and Overview;Lipid metabolism	ko01110//Biosynthesis of secondary metabolites;ko00592//alpha-Linolenic acid metabolism	K08241	-	-	-
Gene013625	CIL1130S0005	Isoform030378	CIL1130S0005	new	KAS	3-oxoacyl-[acyl-carrier-protein] synthase, mitochondrial; K09458 3-oxoacyl-[acyl-carrier-protein] synthase II [EC:2.3.1.179]	Metabolism	Lipid metabolism;Metabolism of cofactors and vitamins;Global and Overview	ko01100//Metabolic pathways;ko01212//Fatty acid metabolism;ko00061//Fatty acid biosynthesis;ko00780//Biotin metabolism	K09458	GO:0043231//intracellular membrane-bounded organelle;GO:0043227//membrane-bounded organelle;GO:0005622//intracellular;GO:0043229//intracellular organelle;GO:0044424//intracellular part;GO:0043226//organelle;GO:0044464//cell part;GO:0005623//cell	GO:0003824//catalytic activity;GO:0016747//transferase activity, transferring acyl groups other than amino-acyl groups;GO:0016746//transferase activity, transferring acyl groups;GO:0004312//fatty acid synthase activity;GO:0016740//transferase activity	GO:0071704//organic substance metabolic process;GO:0008152//metabolic process;GO:0032787//monocarboxylic acid metabolic process;GO:0006082//organic acid metabolic process;GO:0006631//fatty acid metabolic process;GO:0009987//cellular process;GO:0019752//carboxylic acid metabolic process;GO:0044707//single-multicellular organism process;GO:0044255//cellular lipid metabolic process;GO:0044710//singl…
Gene013625	CIL1130S0005	Isoform030379	CIL1130S0005	new	KAS	3-oxoacyl-[acyl-carrier-protein] synthase, mitochondrial; K09458 3-oxoacyl-[acyl-carrier-protein] synthase II [EC:2.3.1.179]	Metabolism	Metabolism of cofactors and vitamins;Lipid metabolism;Global and Overview	ko01100//Metabolic pathways;ko01212//Fatty acid metabolism;ko00061//Fatty acid biosynthesis;ko00780//Biotin metabolism	K09458	-	-	-
Gene013625	CIL1130S0005	Isoform030380	CIL1130S0005	new	KAS	3-oxoacyl-[acyl-carrier-protein] synthase, mitochondrial; K09458 3-oxoacyl-[acyl-carrier-protein] synthase II [EC:2.3.1.179]	Metabolism	Lipid metabolism;Metabolism of cofactors and vitamins;Global and Overview	ko01100//Metabolic pathways;ko01212//Fatty acid metabolism;ko00061//Fatty acid biosynthesis;ko00780//Biotin metabolism	K09458	-	-	-
Gene002271	CIL1393S0019	Isoform005022	CIL1393S0019	known	KAS1	PREDICTED: 3-oxoacyl-[acyl-carrier-protein] synthase I, chloroplastic [Juglans regia]	Metabolism	Lipid metabolism;Metabolism of cofactors and vitamins;Global and Overview	ko01100//Metabolic pathways;ko01212//Fatty acid metabolism;ko00061//Fatty acid biosynthesis;ko00780//Biotin metabolism	K09458	-	GO:0003824//catalytic activity;GO:0016740//transferase activity;GO:0016746//transferase activity, transferring acyl groups	GO:0043436//oxoacid metabolic process;GO:0044763//single-organism cellular process;GO:0019752//carboxylic acid metabolic process;GO:0044699//single-organism process;GO:0071704//organic substance metabolic process;GO:0009987//cellular process;GO:0044281//small molecule metabolic process;GO:0044255//cellular lipid metabolic process;GO:0044710//single-organism metabolic process;GO:0006631//fatty aci…
Gene002271	CIL1393S0019	Isoform005023	CIL1393S0019	new	KAS1	3-ketoacyl-acyl carrier protein synthase I isoform 1; K09458 3-oxoacyl-[acyl-carrier-protein] synthase II [EC:2.3.1.179]	Metabolism	Global and Overview;Lipid metabolism;Metabolism of cofactors and vitamins	ko01100//Metabolic pathways;ko01212//Fatty acid metabolism;ko00061//Fatty acid biosynthesis;ko00780//Biotin metabolism	K09458	-	GO:0016740//transferase activity;GO:0003824//catalytic activity;GO:0016746//transferase activity, transferring acyl groups	GO:0044281//small molecule metabolic process;GO:0043436//oxoacid metabolic process;GO:0006631//fatty acid metabolic process;GO:0044238//primary metabolic process;GO:0071704//organic substance metabolic process;GO:0044255//cellular lipid metabolic process;GO:0006082//organic acid metabolic process;GO:0008152//metabolic process;GO:0044710//single-organism metabolic process;GO:0006629//lipid metabol…
Gene002271	CIL1393S0019	Isoform005024	CIL1393S0019	new	KAS1	3-ketoacyl-acyl carrier protein synthase I isoform 1; K09458 3-oxoacyl-[acyl-carrier-protein] synthase II [EC:2.3.1.179]	Metabolism	Metabolism of cofactors and vitamins;Lipid metabolism;Global and Overview	ko01100//Metabolic pathways;ko01212//Fatty acid metabolism;ko00061//Fatty acid biosynthesis;ko00780//Biotin metabolism	K09458	-	GO:0003824//catalytic activity;GO:0016740//transferase activity;GO:0016746//transferase activity, transferring acyl groups	GO:0006082//organic acid metabolic process;GO:0032787//monocarboxylic acid metabolic process;GO:0044238//primary metabolic process;GO:0044255//cellular lipid metabolic process;GO:0044699//single-organism process;GO:0044710//single-organism metabolic process;GO:0009987//cellular process;GO:0006629//lipid metabolic process;GO:0019752//carboxylic acid metabolic process;GO:0044237//cellular metabolic…
Gene013294	CIL1113S0057	Isoform029607	CIL1113S0057	new	KAS1	50 kDa ketoavyl-ACP synthase (EC:2.3.1.41); K09458 3-oxoacyl-[acyl-carrier-protein] synthase II [EC:2.3.1.179]	Metabolism	Lipid metabolism;Metabolism of cofactors and vitamins;Global and Overview	ko01100//Metabolic pathways;ko01212//Fatty acid metabolism;ko00061//Fatty acid biosynthesis;ko00780//Biotin metabolism	K09458	-	GO:0016740//transferase activity;GO:0016746//transferase activity, transferring acyl groups;GO:0003824//catalytic activity	GO:0044710//single-organism metabolic process;GO:0044237//cellular metabolic process;GO:0032787//monocarboxylic acid metabolic process;GO:0006082//organic acid metabolic process;GO:0071704//organic substance metabolic process;GO:0044238//primary metabolic process;GO:0044255//cellular lipid metabolic process;GO:0044763//single-organism cellular process;GO:0043436//oxoacid metabolic process;GO:0019…
Gene001728	CIL1354S0030,CIL1354S0031,CIL1354S0032,CIL1354S0033	Isoform003754	CIL1354S0030,CIL1354S0031,CIL1354S0032,CIL1354S0033	new	KAS2	3-oxoacyl-[acyl-carrier-protein] synthase II, chloroplastic; K09458 3-oxoacyl-[acyl-carrier-protein] synthase II [EC:2.3.1.179]	Metabolism	Global and Overview;Metabolism of cofactors and vitamins;Lipid metabolism	ko01100//Metabolic pathways;ko01212//Fatty acid metabolism;ko00061//Fatty acid biosynthesis;ko00780//Biotin metabolism	K09458	-	GO:0016746//transferase activity, transferring acyl groups;GO:0016740//transferase activity;GO:0003824//catalytic activity	GO:0032787//monocarboxylic acid metabolic process;GO:0006082//organic acid metabolic process;GO:0044255//cellular lipid metabolic process;GO:0044237//cellular metabolic process;GO:0044763//single-organism cellular process;GO:0043436//oxoacid metabolic process;GO:0044710//single-organism metabolic process;GO:0044699//single-organism process;GO:0006631//fatty acid metabolic process;GO:0044281//smal…
Gene001728	CIL1354S0030,CIL1354S0031,CIL1354S0032,CIL1354S0033	Isoform003755	CIL1354S0030,CIL1354S0031,CIL1354S0032,CIL1354S0033	new	KAS2	3-oxoacyl-[acyl-carrier-protein] synthase II, chloroplastic; K09458 3-oxoacyl-[acyl-carrier-protein] synthase II [EC:2.3.1.179]	Metabolism	Global and Overview;Metabolism of cofactors and vitamins;Lipid metabolism	ko01100//Metabolic pathways;ko01212//Fatty acid metabolism;ko00061//Fatty acid biosynthesis;ko00780//Biotin metabolism	K09458	-	GO:0016740//transferase activity;GO:0016746//transferase activity, transferring acyl groups;GO:0003824//catalytic activity	GO:0044238//primary metabolic process;GO:0009987//cellular process;GO:0006631//fatty acid metabolic process;GO:0044763//single-organism cellular process;GO:0032787//monocarboxylic acid metabolic process;GO:0044281//small molecule metabolic process;GO:0006082//organic acid metabolic process;GO:0006629//lipid metabolic process;GO:0043436//oxoacid metabolic process;GO:0044699//single-organism proces…
Gene001728	CIL1354S0030,CIL1354S0031,CIL1354S0032,CIL1354S0033	Isoform003756	CIL1354S0030,CIL1354S0031,CIL1354S0032,CIL1354S0033	new	KAS2	3-oxoacyl-[acyl-carrier-protein] synthase II, chloroplastic; K09458 3-oxoacyl-[acyl-carrier-protein] synthase II [EC:2.3.1.179]	Metabolism	Metabolism of cofactors and vitamins;Lipid metabolism;Global and Overview	ko01100//Metabolic pathways;ko01212//Fatty acid metabolism;ko00061//Fatty acid biosynthesis;ko00780//Biotin metabolism	K09458	-	GO:0016746//transferase activity, transferring acyl groups;GO:0016740//transferase activity;GO:0003824//catalytic activity	GO:0044237//cellular metabolic process;GO:0008152//metabolic process;GO:0009987//cellular process;GO:0043436//oxoacid metabolic process;GO:0006082//organic acid metabolic process;GO:0044763//single-organism cellular process;GO:0044281//small molecule metabolic process;GO:0044699//single-organism process;GO:0071704//organic substance metabolic process;GO:0019752//carboxylic acid metabolic process;…
Gene001728	CIL1354S0030,CIL1354S0031,CIL1354S0032,CIL1354S0033	Isoform003757	CIL1354S0030	new	KAS2	3-oxoacyl-[acyl-carrier-protein] synthase II, chloroplastic; K09458 3-oxoacyl-[acyl-carrier-protein] synthase II [EC:2.3.1.179]	Metabolism	Metabolism of cofactors and vitamins;Lipid metabolism;Global and Overview	ko01100//Metabolic pathways;ko01212//Fatty acid metabolism;ko00061//Fatty acid biosynthesis;ko00780//Biotin metabolism	K09458	-	GO:0016740//transferase activity;GO:0016746//transferase activity, transferring acyl groups;GO:0003824//catalytic activity	GO:0008152//metabolic process;GO:0044255//cellular lipid metabolic process;GO:0044237//cellular metabolic process;GO:0044699//single-organism process;GO:0044238//primary metabolic process;GO:0006082//organic acid metabolic process;GO:0043436//oxoacid metabolic process;GO:0044763//single-organism cellular process;GO:0006629//lipid metabolic process;GO:0044710//single-organism metabolic process;GO:…
Gene012553	CIL1087S0023	Isoform027816	CIL1087S0023	new	KAS2	Fatty acid biosynthesis 1 isoform 1; K09458 3-oxoacyl-[acyl-carrier-protein] synthase II [EC:2.3.1.179]	Metabolism	Global and Overview;Lipid metabolism;Metabolism of cofactors and vitamins	ko01100//Metabolic pathways;ko01212//Fatty acid metabolism;ko00061//Fatty acid biosynthesis;ko00780//Biotin metabolism	K09458	-	GO:0003824//catalytic activity;GO:0016746//transferase activity, transferring acyl groups;GO:0016740//transferase activity	GO:0044281//small molecule metabolic process;GO:0044710//single-organism metabolic process;GO:0044238//primary metabolic process;GO:0006631//fatty acid metabolic process;GO:0006629//lipid metabolic process;GO:0044237//cellular metabolic process;GO:0044255//cellular lipid metabolic process;GO:0008152//metabolic process;GO:0019752//carboxylic acid metabolic process;GO:0006082//organic acid metaboli…
Gene012553	CIL1087S0023	Isoform027817	CIL1087S0023	new	KAS2	FATTY ACID BIOSYNTHESIS 1 family protein; K09458 3-oxoacyl-[acyl-carrier-protein] synthase II [EC:2.3.1.179]	Metabolism	Lipid metabolism;Metabolism of cofactors and vitamins;Global and Overview	ko01100//Metabolic pathways;ko01212//Fatty acid metabolism;ko00061//Fatty acid biosynthesis;ko00780//Biotin metabolism	K09458	-	GO:0003824//catalytic activity;GO:0016740//transferase activity;GO:0004312//fatty acid synthase activity;GO:0016746//transferase activity, transferring acyl groups;GO:0016747//transferase activity, transferring acyl groups other than amino-acyl groups	GO:0006629//lipid metabolic process;GO:0043436//oxoacid metabolic process;GO:0044281//small molecule metabolic process;GO:0044763//single-organism cellular process;GO:0006082//organic acid metabolic process;GO:0032787//monocarboxylic acid metabolic process;GO:0044238//primary metabolic process;GO:0044699//single-organism process;GO:0044255//cellular lipid metabolic process;GO:0006631//fatty acid …
Gene012553	CIL1087S0023	Isoform027818	CIL1087S0023	new	KAS2	FATTY ACID BIOSYNTHESIS 1 family protein; K09458 3-oxoacyl-[acyl-carrier-protein] synthase II [EC:2.3.1.179]	Metabolism	Metabolism of cofactors and vitamins;Lipid metabolism;Global and Overview	ko01100//Metabolic pathways;ko01212//Fatty acid metabolism;ko00061//Fatty acid biosynthesis;ko00780//Biotin metabolism	K09458	-	GO:0016747//transferase activity, transferring acyl groups other than amino-acyl groups;GO:0004312//fatty acid synthase activity;GO:0016740//transferase activity;GO:0003824//catalytic activity;GO:0016746//transferase activity, transferring acyl groups	GO:0044710//single-organism metabolic process;GO:0008152//metabolic process;GO:0044238//primary metabolic process;GO:0044699//single-organism process;GO:0044281//small molecule metabolic process;GO:0044255//cellular lipid metabolic process;GO:0006631//fatty acid metabolic process;GO:0006629//lipid metabolic process;GO:0044763//single-organism cellular process;GO:0006082//organic acid metabolic pr…
Gene012553	CIL1087S0023	Isoform027819	CIL1087S0023	new	KAS2	Fatty acid biosynthesis 1 isoform 1; K09458 3-oxoacyl-[acyl-carrier-protein] synthase II [EC:2.3.1.179]	Metabolism	Metabolism of cofactors and vitamins;Lipid metabolism;Global and Overview	ko01100//Metabolic pathways;ko01212//Fatty acid metabolism;ko00061//Fatty acid biosynthesis;ko00780//Biotin metabolism	K09458	-	GO:0016746//transferase activity, transferring acyl groups;GO:0003824//catalytic activity;GO:0016740//transferase activity	GO:0071704//organic substance metabolic process;GO:0044699//single-organism process;GO:0006631//fatty acid metabolic process;GO:0044238//primary metabolic process;GO:0032787//monocarboxylic acid metabolic process;GO:0019752//carboxylic acid metabolic process;GO:0044237//cellular metabolic process;GO:0006082//organic acid metabolic process;GO:0044281//small molecule metabolic process;GO:0009987//c…
Gene012553	CIL1087S0023	Isoform027820	CIL1087S0023	new	KAS2	Fatty acid biosynthesis 1 isoform 1; K09458 3-oxoacyl-[acyl-carrier-protein] synthase II [EC:2.3.1.179]	Metabolism	Global and Overview;Lipid metabolism;Metabolism of cofactors and vitamins	ko01100//Metabolic pathways;ko01212//Fatty acid metabolism;ko00061//Fatty acid biosynthesis;ko00780//Biotin metabolism	K09458	-	GO:0016746//transferase activity, transferring acyl groups;GO:0003824//catalytic activity;GO:0016740//transferase activity	GO:0044237//cellular metabolic process;GO:0008152//metabolic process;GO:0044710//single-organism metabolic process;GO:0044699//single-organism process;GO:0044238//primary metabolic process;GO:0019752//carboxylic acid metabolic process;GO:0044255//cellular lipid metabolic process;GO:0009987//cellular process;GO:0006631//fatty acid metabolic process;GO:0071704//organic substance metabolic process;G…
Gene012553	CIL1087S0023	Isoform027821	CIL1087S0023	new	KAS2	Fatty acid biosynthesis 1 isoform 1; K09458 3-oxoacyl-[acyl-carrier-protein] synthase II [EC:2.3.1.179]	Metabolism	Lipid metabolism;Metabolism of cofactors and vitamins;Global and Overview	ko01100//Metabolic pathways;ko01212//Fatty acid metabolism;ko00061//Fatty acid biosynthesis;ko00780//Biotin metabolism	K09458	-	GO:0016746//transferase activity, transferring acyl groups;GO:0016740//transferase activity;GO:0003824//catalytic activity	GO:0044763//single-organism cellular process;GO:0006082//organic acid metabolic process;GO:0044237//cellular metabolic process;GO:0044255//cellular lipid metabolic process;GO:0009987//cellular process;GO:0032787//monocarboxylic acid metabolic process;GO:0006631//fatty acid metabolic process;GO:0044699//single-organism process;GO:0044710//single-organism metabolic process;GO:0071704//organic subst…
Gene007991	CIL0923S0064	Isoform017630	CIL0923S0064	new	KAS3B	3-oxoacyl-[acyl-carrier-protein] synthase 3 A, chloroplastic; K00648 3-oxoacyl-[acyl-carrier-protein] synthase III [EC:2.3.1.180]	Metabolism	Global and Overview;Lipid metabolism	ko01100//Metabolic pathways;ko01212//Fatty acid metabolism;ko00061//Fatty acid biosynthesis	K00648	GO:0043231//intracellular membrane-bounded organelle;GO:0043229//intracellular organelle;GO:0005623//cell;GO:0043226//organelle;GO:0009532//plastid stroma;GO:0009536//plastid;GO:0043227//membrane-bounded organelle;GO:0044446//intracellular organelle part;GO:0005622//intracellular;GO:0005737//cytoplasm;GO:0044464//cell part;GO:0044424//intracellular part;GO:0044422//organelle part;GO:0044444//cyto…	GO:0004312//fatty acid synthase activity;GO:0016746//transferase activity, transferring acyl groups;GO:0016740//transferase activity;GO:0016747//transferase activity, transferring acyl groups other than amino-acyl groups;GO:0003824//catalytic activity	GO:0006629//lipid metabolic process;GO:0044281//small molecule metabolic process;GO:0016129//phytosteroid biosynthetic process;GO:0044710//single-organism metabolic process;GO:0035383//thioester metabolic process;GO:0006082//organic acid metabolic process;GO:1901360//organic cyclic compound metabolic process;GO:0032502//developmental process;GO:0044763//single-organism cellular process;GO:0006631…
Gene013094	CIL0098S0006	Isoform029131	CIL0098S0006	new	KAS3B	3-oxoacyl-[acyl-carrier-protein] synthase III, chloroplastic-like; K00648 3-oxoacyl-[acyl-carrier-protein] synthase III [EC:2.3.1.180]	Metabolism	Global and Overview;Lipid metabolism	ko01100//Metabolic pathways;ko01212//Fatty acid metabolism;ko00061//Fatty acid biosynthesis	K00648	GO:0044444//cytoplasmic part;GO:0044464//cell part;GO:0043229//intracellular organelle;GO:0044424//intracellular part;GO:0043226//organelle;GO:0005737//cytoplasm;GO:0005623//cell;GO:0043227//membrane-bounded organelle;GO:0043231//intracellular membrane-bounded organelle;GO:0009536//plastid;GO:0005622//intracellular	GO:0016747//transferase activity, transferring acyl groups other than amino-acyl groups;GO:0016740//transferase activity;GO:0003824//catalytic activity;GO:0016746//transferase activity, transferring acyl groups	GO:0043436//oxoacid metabolic process;GO:0008152//metabolic process;GO:0006629//lipid metabolic process;GO:0006066//alcohol metabolic process;GO:0006082//organic acid metabolic process;GO:0044699//single-organism process;GO:0044710//single-organism metabolic process;GO:0046165//alcohol biosynthetic process;GO:1901617//organic hydroxy compound biosynthetic process;GO:0009987//cellular process;GO:0…
Gene003375	CIL1473S0011,CIL1473S0012,CIL1473S0013,CIL1473S0015	Isoform007332	CIL1473S0013	known	KCR1	PREDICTED: very-long-chain 3-oxoacyl-CoA reductase 1 [Juglans regia]	Metabolism	Global and Overview;Lipid metabolism	ko01100//Metabolic pathways;ko01110//Biosynthesis of secondary metabolites;ko01212//Fatty acid metabolism;ko01040//Biosynthesis of unsaturated fatty acids;ko00062//Fatty acid elongation	K10251	-	GO:0003824//catalytic activity	GO:0008152//metabolic process;GO:0044710//single-organism metabolic process;GO:0044699//single-organism process
Gene004065	CIL1526S0008,CIL1526S0009	Isoform008873	CIL1526S0008,CIL1526S0009	new	KCR2	very-long-chain 3-oxoacyl-CoA reductase-like protein At1g24470; K10251 17beta-estradiol 17-dehydrogenase / very-long-chain 3-oxoacyl-CoA reductase [EC:1.1.1.62 1.1.1.330]	Metabolism	Global and Overview;Lipid metabolism	ko01100//Metabolic pathways;ko01110//Biosynthesis of secondary metabolites;ko01212//Fatty acid metabolism;ko01040//Biosynthesis of unsaturated fatty acids;ko00062//Fatty acid elongation	K10251	-	GO:0003824//catalytic activity	GO:0008152//metabolic process;GO:0044699//single-organism process;GO:0044710//single-organism metabolic process
Gene015474	-	Isoform034691	-	novel	KCS1	3-ketoacyl-CoA synthase 1; K15397 3-ketoacyl-CoA synthase [EC:2.3.1.199]	Metabolism	Global and Overview;Lipid metabolism	ko01110//Biosynthesis of secondary metabolites;ko00062//Fatty acid elongation	K15397	-	GO:0003824//catalytic activity;GO:0016740//transferase activity;GO:0016746//transferase activity, transferring acyl groups	GO:0044237//cellular metabolic process;GO:0044699//single-organism process;GO:0032787//monocarboxylic acid metabolic process;GO:0008152//metabolic process;GO:0006082//organic acid metabolic process;GO:0044710//single-organism metabolic process;GO:0006629//lipid metabolic process;GO:0044238//primary metabolic process;GO:0043436//oxoacid metabolic process;GO:0019752//carboxylic acid metabolic proce…
Gene002329	CIL1400S0005	Isoform005125	CIL1400S0005	new	KCS11	3-ketoacyl-CoA synthase 11-like; K15397 3-ketoacyl-CoA synthase [EC:2.3.1.199]	Metabolism	Lipid metabolism;Global and Overview	ko01110//Biosynthesis of secondary metabolites;ko00062//Fatty acid elongation	K15397	-	GO:0003824//catalytic activity;GO:0016746//transferase activity, transferring acyl groups;GO:0016740//transferase activity	GO:0032787//monocarboxylic acid metabolic process;GO:0044238//primary metabolic process;GO:0044699//single-organism process;GO:0044710//single-organism metabolic process;GO:0006631//fatty acid metabolic process;GO:0019752//carboxylic acid metabolic process;GO:0044237//cellular metabolic process;GO:0044255//cellular lipid metabolic process;GO:0071704//organic substance metabolic process;GO:0043436…
Gene003774	CIL1502S0040,CIL1502S0041,CIL1502S0043	Isoform008268	CIL1502S0040,CIL1502S0041	new	KCS11	3-ketoacyl-CoA synthase 11-like; K15397 3-ketoacyl-CoA synthase [EC:2.3.1.199]	Metabolism	Lipid metabolism;Global and Overview	ko01110//Biosynthesis of secondary metabolites;ko00062//Fatty acid elongation	K15397	-	GO:0016746//transferase activity, transferring acyl groups;GO:0003824//catalytic activity;GO:0016740//transferase activity	GO:0032787//monocarboxylic acid metabolic process;GO:0071704//organic substance metabolic process;GO:0044237//cellular metabolic process;GO:0043436//oxoacid metabolic process;GO:0044710//single-organism metabolic process;GO:0008152//metabolic process;GO:0006082//organic acid metabolic process;GO:0006629//lipid metabolic process;GO:0044699//single-organism process;GO:0044281//small molecule metabo…
Gene003774	CIL1502S0040,CIL1502S0041,CIL1502S0043	Isoform008273	CIL1502S0040|CIL1502S0041	known|new	KCS11	PREDICTED: 3-ketoacyl-CoA synthase 11-like [Juglans regia]	Organismal Systems;Metabolism	Global and Overview;Lipid metabolism;Environmental adaptation	ko01100//Metabolic pathways;ko01110//Biosynthesis of secondary metabolites;ko04626//Plant-pathogen interaction;ko00062//Fatty acid elongation	K15397	-	GO:0003824//catalytic activity;GO:0016746//transferase activity, transferring acyl groups;GO:0016740//transferase activity	GO:0006631//fatty acid metabolic process;GO:0071704//organic substance metabolic process;GO:0019752//carboxylic acid metabolic process;GO:0008152//metabolic process;GO:0044237//cellular metabolic process;GO:0044699//single-organism process;GO:0044281//small molecule metabolic process;GO:0043436//oxoacid metabolic process;GO:0032787//monocarboxylic acid metabolic process;GO:0009987//cellular proce…
Gene003774	CIL1502S0040,CIL1502S0041,CIL1502S0043	Isoform008275	CIL1502S0040,CIL1502S0041	new	KCS11	3-ketoacyl-CoA synthase 11-like; K15397 3-ketoacyl-CoA synthase [EC:2.3.1.199]	Metabolism	Global and Overview;Lipid metabolism	ko01110//Biosynthesis of secondary metabolites;ko00062//Fatty acid elongation	K15397	-	GO:0016740//transferase activity;GO:0003824//catalytic activity;GO:0016746//transferase activity, transferring acyl groups	GO:0044281//small molecule metabolic process;GO:0008152//metabolic process;GO:0044763//single-organism cellular process;GO:0044238//primary metabolic process;GO:0044710//single-organism metabolic process;GO:0019752//carboxylic acid metabolic process;GO:0032787//monocarboxylic acid metabolic process;GO:0009987//cellular process;GO:0006631//fatty acid metabolic process;GO:0006082//organic acid meta…
Gene009270	CIL0967S0129	Isoform020654	CIL0967S0129	new	KCS11	3-ketoacyl-CoA synthase 11-like; K15397 3-ketoacyl-CoA synthase [EC:2.3.1.199]	Metabolism	Lipid metabolism;Global and Overview	ko01110//Biosynthesis of secondary metabolites;ko00062//Fatty acid elongation	K15397	-	GO:0016746//transferase activity, transferring acyl groups;GO:0003824//catalytic activity;GO:0016740//transferase activity	GO:0044710//single-organism metabolic process;GO:0044255//cellular lipid metabolic process;GO:0071704//organic substance metabolic process;GO:0044763//single-organism cellular process;GO:0006631//fatty acid metabolic process;GO:0043436//oxoacid metabolic process;GO:0006629//lipid metabolic process;GO:0006082//organic acid metabolic process;GO:0044237//cellular metabolic process;GO:0032787//monoca…
Gene009355	-	Isoform020823	-	novel	KCS17	3-ketoacyl-CoA synthase 19-like; K15397 3-ketoacyl-CoA synthase [EC:2.3.1.199]	Metabolism	Lipid metabolism;Global and Overview	ko01110//Biosynthesis of secondary metabolites;ko00062//Fatty acid elongation	K15397	-	-	-
Gene009356	-	Isoform020824	-	novel	KCS17	3-ketoacyl-CoA synthase 19-like; K15397 3-ketoacyl-CoA synthase [EC:2.3.1.199]	Metabolism	Global and Overview;Lipid metabolism	ko01110//Biosynthesis of secondary metabolites;ko00062//Fatty acid elongation	K15397	-	-	-
Gene002059	CIL0125S0009	Isoform004537	CIL0125S0009	known	KCS4	PREDICTED: 3-ketoacyl-CoA synthase 4-like [Juglans regia]	Metabolism;Organismal Systems	Global and Overview;Lipid metabolism;Environmental adaptation	ko01100//Metabolic pathways;ko01110//Biosynthesis of secondary metabolites;ko04626//Plant-pathogen interaction;ko00062//Fatty acid elongation	K15397	-	GO:0016740//transferase activity;GO:0003824//catalytic activity;GO:0016746//transferase activity, transferring acyl groups	GO:0044763//single-organism cellular process;GO:0006631//fatty acid metabolic process;GO:0008152//metabolic process;GO:0032787//monocarboxylic acid metabolic process;GO:0009987//cellular process;GO:0044237//cellular metabolic process;GO:0044255//cellular lipid metabolic process;GO:0071704//organic substance metabolic process;GO:0019752//carboxylic acid metabolic process;GO:0044710//single-organis…
Gene009310	CIL0970S0059	Isoform020733	CIL0970S0059	new	LACS1	long chain acyl-CoA synthetase 1; K01897 long-chain acyl-CoA synthetase [EC:6.2.1.3]	Metabolism;Cellular Processes	Global and Overview;Transport and catabolism;Lipid metabolism	ko01100//Metabolic pathways;ko01212//Fatty acid metabolism;ko04146//Peroxisome;ko00061//Fatty acid biosynthesis;ko00071//Fatty acid degradation	K01897	-	-	-
Gene009310	CIL0970S0059	Isoform020734	CIL0970S0059	new	LACS1	long chain acyl-CoA synthetase 1; K01897 long-chain acyl-CoA synthetase [EC:6.2.1.3]	Cellular Processes;Metabolism	Global and Overview;Lipid metabolism;Transport and catabolism	ko01100//Metabolic pathways;ko01212//Fatty acid metabolism;ko04146//Peroxisome;ko00061//Fatty acid biosynthesis;ko00071//Fatty acid degradation	K01897	-	-	-
Gene009310	CIL0970S0059	Isoform020735	CIL0970S0059	new	LACS1	long chain acyl-CoA synthetase 1; K01897 long-chain acyl-CoA synthetase [EC:6.2.1.3]	Cellular Processes;Metabolism	Transport and catabolism;Lipid metabolism;Global and Overview	ko01100//Metabolic pathways;ko01212//Fatty acid metabolism;ko04146//Peroxisome;ko00061//Fatty acid biosynthesis;ko00071//Fatty acid degradation	K01897	-	-	-
Gene009310	CIL0970S0059	Isoform020736	CIL0970S0059	new	LACS1	long chain acyl-CoA synthetase 1; K01897 long-chain acyl-CoA synthetase [EC:6.2.1.3]	Metabolism;Cellular Processes	Global and Overview;Lipid metabolism;Transport and catabolism	ko01100//Metabolic pathways;ko01212//Fatty acid metabolism;ko04146//Peroxisome;ko00061//Fatty acid biosynthesis;ko00071//Fatty acid degradation	K01897	-	-	-
Gene012195	CIL1075S0087	Isoform027079	CIL1075S0087	new	LACS1	long chain acyl-CoA synthetase 1-like; K01897 long-chain acyl-CoA synthetase [EC:6.2.1.3]	Metabolism;Cellular Processes	Transport and catabolism;Lipid metabolism;Global and Overview	ko01100//Metabolic pathways;ko01212//Fatty acid metabolism;ko04146//Peroxisome;ko00061//Fatty acid biosynthesis;ko00071//Fatty acid degradation	K01897	-	-	-
Gene012195	CIL1075S0087	Isoform027080	CIL1075S0087	new	LACS1	long chain acyl-CoA synthetase 1-like; K01897 long-chain acyl-CoA synthetase [EC:6.2.1.3]	Cellular Processes;Metabolism	Transport and catabolism;Lipid metabolism;Global and Overview	ko01100//Metabolic pathways;ko01212//Fatty acid metabolism;ko04146//Peroxisome;ko00061//Fatty acid biosynthesis;ko00071//Fatty acid degradation	K01897	-	GO:0003824//catalytic activity	-
Gene014790	CIL1164S0071	Isoform033129	CIL1164S0071	new	LACS2	long chain acyl-CoA synthetase 2-like; K01897 long-chain acyl-CoA synthetase [EC:6.2.1.3]	Metabolism;Cellular Processes	Transport and catabolism;Lipid metabolism;Global and Overview	ko01100//Metabolic pathways;ko01212//Fatty acid metabolism;ko04146//Peroxisome;ko00061//Fatty acid biosynthesis;ko00071//Fatty acid degradation	K01897	GO:0044424//intracellular part;GO:0043229//intracellular organelle;GO:0005911//cell-cell junction;GO:0005622//intracellular;GO:0044464//cell part;GO:0043231//intracellular membrane-bounded organelle;GO:0030054//cell junction;GO:0043226//organelle;GO:0005623//cell;GO:0043227//membrane-bounded organelle	GO:0015645//fatty acid ligase activity;GO:0016874//ligase activity;GO:0003824//catalytic activity;GO:0005488//binding;GO:0001882//nucleoside binding;GO:0032550//purine ribonucleoside binding;GO:0016877//ligase activity, forming carbon-sulfur bonds;GO:0097367//carbohydrate derivative binding;GO:0032549//ribonucleoside binding;GO:0001883//purine nucleoside binding;GO:0036094//small molecule binding…	GO:0043170//macromolecule metabolic process;GO:0044281//small molecule metabolic process;GO:0006629//lipid metabolic process;GO:0071704//organic substance metabolic process;GO:0009058//biosynthetic process;GO:0032501//multicellular organismal process;GO:0044255//cellular lipid metabolic process;GO:0044237//cellular metabolic process;GO:0009620//response to fungus;GO:0044767//single-organism devel…
Gene014790	CIL1164S0071	Isoform033130	CIL1164S0071	new	LACS2	Long-chain acyl-CoA synthetase 2 isoform 1; K01897 long-chain acyl-CoA synthetase [EC:6.2.1.3]	Cellular Processes;Metabolism	Global and Overview;Lipid metabolism;Transport and catabolism	ko01100//Metabolic pathways;ko01212//Fatty acid metabolism;ko04146//Peroxisome;ko00061//Fatty acid biosynthesis;ko00071//Fatty acid degradation	K01897	-	GO:0005488//binding;GO:0036094//small molecule binding;GO:0016874//ligase activity;GO:0016877//ligase activity, forming carbon-sulfur bonds;GO:0003824//catalytic activity;GO:0015645//fatty acid ligase activity;GO:0097159//organic cyclic compound binding;GO:1901363//heterocyclic compound binding	GO:0044238//primary metabolic process;GO:0032787//monocarboxylic acid metabolic process;GO:0071704//organic substance metabolic process;GO:0008152//metabolic process;GO:0044255//cellular lipid metabolic process;GO:0009058//biosynthetic process;GO:0009987//cellular process;GO:0043436//oxoacid metabolic process;GO:0009607//response to biotic stimulus;GO:0044237//cellular metabolic process;GO:004476…
Gene004413	CIL1564S0029	Isoform009593	CIL1564S0029	new	LACS4	long chain acyl-CoA synthetase 4-like; K01897 long-chain acyl-CoA synthetase [EC:6.2.1.3]	Metabolism;Cellular Processes	Transport and catabolism;Lipid metabolism;Global and Overview	ko01100//Metabolic pathways;ko01212//Fatty acid metabolism;ko04146//Peroxisome;ko00061//Fatty acid biosynthesis;ko00071//Fatty acid degradation	K01897	-	GO:0003824//catalytic activity	-
Gene004413	CIL1564S0029	Isoform009594	CIL1564S0029	new	LACS4	long chain acyl-CoA synthetase 4-like; K01897 long-chain acyl-CoA synthetase [EC:6.2.1.3]	Cellular Processes;Metabolism	Transport and catabolism;Lipid metabolism;Global and Overview	ko01100//Metabolic pathways;ko01212//Fatty acid metabolism;ko04146//Peroxisome;ko00061//Fatty acid biosynthesis;ko00071//Fatty acid degradation	K01897	-	-	-
Gene004413	CIL1564S0029	Isoform009595	CIL1564S0029	new	LACS4	long chain acyl-CoA synthetase 4; K01897 long-chain acyl-CoA synthetase [EC:6.2.1.3]	Metabolism;Cellular Processes	Transport and catabolism;Lipid metabolism;Global and Overview	ko01100//Metabolic pathways;ko01212//Fatty acid metabolism;ko04146//Peroxisome;ko00061//Fatty acid biosynthesis;ko00071//Fatty acid degradation	K01897	-	-	-
Gene004413	CIL1564S0029	Isoform009596	CIL1564S0029	new	LACS4	POPTRDRAFT_817412; acyl-coA synthetase family protein; K01897 long-chain acyl-CoA synthetase [EC:6.2.1.3]	Metabolism;Cellular Processes	Global and Overview;Transport and catabolism;Lipid metabolism	ko01100//Metabolic pathways;ko01212//Fatty acid metabolism;ko04146//Peroxisome;ko00061//Fatty acid biosynthesis;ko00071//Fatty acid degradation	K01897	-	-	-
Gene004413	CIL1564S0029	Isoform009597	CIL1564S0029	new	LACS4	long chain acyl-CoA synthetase 4-like; K01897 long-chain acyl-CoA synthetase [EC:6.2.1.3]	Metabolism;Cellular Processes	Transport and catabolism;Lipid metabolism;Global and Overview	ko01100//Metabolic pathways;ko01212//Fatty acid metabolism;ko04146//Peroxisome;ko00061//Fatty acid biosynthesis;ko00071//Fatty acid degradation	K01897	-	-	-
Gene004413	CIL1564S0029	Isoform009598	CIL1564S0029	new	LACS4	long chain acyl-CoA synthetase 4-like; K01897 long-chain acyl-CoA synthetase [EC:6.2.1.3]	Metabolism;Cellular Processes	Transport and catabolism;Lipid metabolism;Global and Overview	ko01100//Metabolic pathways;ko01212//Fatty acid metabolism;ko04146//Peroxisome;ko00061//Fatty acid biosynthesis;ko00071//Fatty acid degradation	K01897	-	GO:0003824//catalytic activity	-
Gene004413	CIL1564S0029	Isoform009599	CIL1564S0029	new	LACS4	long chain acyl-CoA synthetase 4-like; K01897 long-chain acyl-CoA synthetase [EC:6.2.1.3]	Cellular Processes;Metabolism	Global and Overview;Lipid metabolism;Transport and catabolism	ko01100//Metabolic pathways;ko01212//Fatty acid metabolism;ko04146//Peroxisome;ko00061//Fatty acid biosynthesis;ko00071//Fatty acid degradation	K01897	-	GO:0003824//catalytic activity	-
Gene007676	CIL0919S0011	Isoform016926	CIL0919S0011	new	LACS4	long chain acyl-CoA synthetase 4-like; K01897 long-chain acyl-CoA synthetase [EC:6.2.1.3]	Metabolism;Cellular Processes	Transport and catabolism;Lipid metabolism;Global and Overview	ko01100//Metabolic pathways;ko01212//Fatty acid metabolism;ko04146//Peroxisome;ko00061//Fatty acid biosynthesis;ko00071//Fatty acid degradation	K01897	-	-	-
Gene007676	CIL0919S0011	Isoform016927	CIL0919S0011	new	LACS4	long chain acyl-CoA synthetase 4-like; K01897 long-chain acyl-CoA synthetase [EC:6.2.1.3]	Metabolism;Cellular Processes	Global and Overview;Lipid metabolism;Transport and catabolism	ko01100//Metabolic pathways;ko01212//Fatty acid metabolism;ko04146//Peroxisome;ko00061//Fatty acid biosynthesis;ko00071//Fatty acid degradation	K01897	-	-	-
Gene007676	CIL0919S0011	Isoform016928	CIL0919S0011	new	LACS4	long chain acyl-CoA synthetase 4; K01897 long-chain acyl-CoA synthetase [EC:6.2.1.3]	Metabolism;Cellular Processes	Global and Overview;Lipid metabolism;Transport and catabolism	ko01100//Metabolic pathways;ko01212//Fatty acid metabolism;ko04146//Peroxisome;ko00061//Fatty acid biosynthesis;ko00071//Fatty acid degradation	K01897	-	-	-
Gene011765	CIL1057S0044	Isoform026196	CIL1057S0044	new	LACS6	long chain acyl-CoA synthetase 6, peroxisomal-like; K01897 long-chain acyl-CoA synthetase [EC:6.2.1.3]	Metabolism;Cellular Processes	Global and Overview;Lipid metabolism;Transport and catabolism	ko01100//Metabolic pathways;ko01212//Fatty acid metabolism;ko04146//Peroxisome;ko00061//Fatty acid biosynthesis;ko00071//Fatty acid degradation	K01897	-	-	-
[truncated: 311 more rows]
